# Supplementary material for: Unravelling Glucoraphanin and Glucoerucin Metabolism across Broccoli Sprout Development: Insights from Metabolite and Transcriptome Analysis
Source: MDPI journal article supplement (doi:10.3390/plants13060750), 2024-03-07
Supplement: s1 [file s1]

Table S1 The primers designed and used for qRT-PCR in this study.

| Primers | Sequence(5'-3')      | Length (bp) | Gene code    | Gene name     |
|---------|----------------------|-------------|--------------|---------------|
| 757-F   | CTGGGCTCGAAGTAGTGCAA | 164         | BolC1t04757H | <i>NSP2</i>   |
| 757-R   | AACAACCGCACTAGCGAAGA |             |              |               |
| 742-F   | GAAGTGGGTACAGTGTGCGA | 90          | BolC5t33742H | <i>NSP1-1</i> |
| 742-R   | ACCACCCAAACCTTCCCTTG |             |              |               |
| 748-F   | AAACCCTTTTGGAGGCCACA | 76          | BolC5t33748H | <i>NSP1-2</i> |
| 748-R   | AGCTGTCCATCCCCTGATCT |             |              |               |
| 690-F   | CGACGACACTCGCAGATACA | 78          | BolC2t11690H | <i>NSP5-2</i> |
| 690-R   | TCAACGGGAGACAGCAACTC |             |              |               |
| 753-F   | TGGGTCCGGGACAATTGATG | 76          | BolC5t33753H | <i>NSP1-3</i> |
| 753-R   | TGTGGCCTCCAAAAGGGTTT |             |              |               |
| 414-F   | CTGGGGAGGCTTGTAAGGG  | 134         | BolC7t44414H | <i>NSP5-1</i> |
| 414-R   | GGTCCATTTCCGGTAGCCA  |             |              |               |
