# Supplementary material for: Unravelling Glucoraphanin and Glucoerucin Metabolism across Broccoli Sprout Development: Insights from Metabolite and Transcriptome Analysis
Source: Plants (Basel). 2024 Mar 7;13(6):750. doi: 10.3390/plants13060750 (PMC10976094; doi:10.3390/plants13060750)
Supplement: Supplementary file 1 [file plants-13-00750-s001.zip]

Archive with 4 entries (4 files):
- Figure S1 and S2.pdf
- Table S1.pdf
- Table S2.xls
- Table S3.xls
