# Supplementary material for: Unravelling Glucoraphanin and Glucoerucin Metabolism across Broccoli Sprout Development: Insights from Metabolite and Transcriptome Analysis
Source: Plants (Basel). 2024 Mar 7;13(6):750. doi: 10.3390/plants13060750 (PMC10976094; doi:10.3390/plants13060750)
Supplement: Supplementary file 1 [file plants-13-00750-s001.zip › Table S2.xls]

Geneid	1d_A	1d_B	1d_C	3d_A	3d_B	3d_C	5d_A	5d_B	5d_C	Function
BolSC101t60211H	0.000	0.000	0.000	0.221	0.000	0.204	0.000	0.197	0.000	PREDICTED: 50S ribosomal protein L22-like isoform X1 [Brassica oleracea var. oleracea]
BolSC101t60212H	24.264	15.166	18.938	54.104	55.375	25.855	7.016	4.633	5.430	PREDICTED: glutathione S-transferase U9 [Raphanus sativus]
BolSC101t60213H	0.000	0.000	0.000	0.000	0.000	0.000	0.000	0.000	0.121	HVA22-like protein b [Brassica napus]
BolSC102t60214H	0.000	0.000	0.000	0.000	0.000	0.000	0.000	0.000	0.000	cysteine-rich receptor-like protein kinase 5 isoform X2 [Brassica napus]
BolSC103t60215H	0.000	0.000	0.000	0.000	0.000	0.000	0.000	0.000	0.000	unnamed protein product [Brassica oleracea]
BolSC103t60216H	0.000	0.000	0.000	0.000	0.000	0.000	0.000	0.000	0.000	unnamed protein product [Brassica oleracea]
BolSC120t60217H	0.000	0.000	0.000	0.059	0.000	0.054	0.000	0.000	0.112	PREDICTED: bidirectional sugar transporter SWEET3 [Raphanus sativus]
BolSC126t60218H	0.000	0.000	0.000	0.685	0.229	0.084	0.000	0.448	0.130	PREDICTED: beta-amylase 5-like [Raphanus sativus]
BolSC126t60219H	0.000	0.000	0.000	0.852	0.233	0.143	0.152	0.069	0.221	PREDICTED: beta-amylase 5-like [Raphanus sativus]
BolSC126t60220H	8.086	11.541	8.379	9.289	7.780	6.728	7.910	8.489	9.556	KIN17-like protein [Brassica napus]
BolSC132t60221H	0.149	0.000	0.085	0.244	0.489	0.000	0.080	0.072	0.154	phosphoglycerate mutase-like protein AT74 [Brassica napus]
BolSC132t60222H	0.700	0.716	1.256	2.965	3.178	2.553	6.373	6.037	2.930	PREDICTED: GDSL esterase/lipase At3g05180-like [Brassica oleracea var. oleracea]
BolSC21t60223H	1.945	2.174	1.700	10.617	10.022	8.428	10.409	10.514	9.178	PREDICTED: kinesin-like protein NACK2 isoform X2 [Brassica oleracea var. oleracea]
BolSC21t60224H	0.840	1.020	1.363	3.522	3.275	0.964	1.153	4.304	4.957	BnaCnng11930D [Brassica napus]
BolSC21t60225H	117.861	102.242	112.811	133.452	140.573	116.018	55.497	66.698	51.728	calmodulin-like [Brassica napus]
BolSC21t60226H	0.000	0.000	0.000	0.000	0.000	0.000	0.000	0.000	0.000	PREDICTED: uncharacterized protein LOC108869042 [Brassica rapa]
BolSC21t60227H	0.000	0.000	0.000	0.089	0.000	0.164	0.000	0.000	0.000	PREDICTED: E3 ubiquitin-protein ligase MBR2-like [Brassica oleracea var. oleracea]
BolSC21t60228H	0.000	0.000	0.000	0.000	0.000	0.000	0.000	0.000	0.120	uncharacterized protein LOC106371142 [Brassica napus]
BolSC21t60229H	37.095	34.844	38.600	15.360	14.840	12.519	12.090	13.194	12.507	PREDICTED: N-alpha-acetyltransferase 35, NatC auxiliary subunit [Brassica oleracea var. oleracea]
BolSC21t60230H	0.000	0.000	0.000	0.000	0.000	0.000	0.000	0.000	0.000	PREDICTED: uncharacterized protein LOC103853658 isoform X1 [Brassica rapa]
BolSC21t60231H	0.000	0.000	0.000	0.000	0.000	0.000	0.000	0.000	0.000	unnamed protein product, partial [Brassica oleracea]
BolSC21t60232H	0.071	0.000	0.000	0.000	0.000	0.000	0.151	0.000	0.000	hypothetical protein BRARA_F01930 [Brassica rapa]
BolSC21t60233H	2.237	2.083	2.513	2.350	2.035	2.819	3.687	3.854	3.105	hypothetical protein BRARA_F01978 [Brassica rapa]
BolSC21t60234H	1.102	1.471	1.165	1.886	1.810	1.599	5.287	2.950	2.783	indole-3-acetaldehyde oxidase-like isoform X2 [Brassica napus]
BolSC21t60235H	0.000	0.000	0.000	0.000	0.000	0.000	0.000	0.197	0.000	BnaA10g08980D [Brassica napus]
BolSC21t60236H	70.701	85.484	66.590	100.544	107.750	109.660	50.514	50.267	52.074	PREDICTED: protein FATTY ACID EXPORT 2, chloroplastic [Camelina sativa]
BolSC21t60237H	0.244	0.000	0.139	0.398	0.133	0.123	0.000	0.000	0.000	hypothetical protein F2Q70_00011891 [Brassica cretica]
BolSC21t60238H	0.000	0.000	0.000	0.000	0.000	0.000	0.000	0.000	0.000	hypothetical protein DY000_00022769 [Brassica cretica]
BolSC21t60239H	0.000	0.000	0.000	0.000	0.000	0.000	0.000	0.000	0.000	unnamed protein product, partial [Brassica oleracea]
BolSC21t60240H	0.053	0.000	0.000	0.000	0.000	0.000	0.000	0.000	0.000	uncharacterized protein At4g02000-like isoform X2 [Brassica napus]
BolSC21t60241H	0.000	0.224	0.000	0.000	0.000	0.000	0.000	0.000	0.000	hypothetical protein F2Q68_00022598 [Brassica cretica]
BolSC21t60242H	0.000	0.000	0.175	0.168	0.000	0.000	1.153	1.346	0.637	hypothetical protein F2Q70_00020633 [Brassica cretica]
BolSC21t60243H	0.154	0.187	0.351	0.503	0.337	0.930	2.471	1.645	1.753	hypothetical protein F2Q70_00020633 [Brassica cretica]
BolSC21t60244H	0.000	0.000	0.000	0.000	0.000	0.000	0.000	0.000	0.000	uncharacterized protein LOC106369614 [Brassica napus]
BolSC21t60245H	0.000	0.000	0.000	0.000	0.000	0.000	0.000	0.000	0.000	uncharacterized protein LOC106422369 [Brassica napus]
BolSC21t60246H	0.000	0.000	0.000	0.000	0.000	0.000	0.000	0.000	0.000	unnamed protein product [Brassica oleracea]
BolSC21t60247H	0.000	0.000	0.000	0.000	0.000	0.000	0.000	0.000	0.000	ATP-dependent DNA helicase PIF1-like [Brassica napus]
BolSC21t60248H	0.000	0.000	0.000	0.000	0.000	0.000	0.000	0.000	0.000	PREDICTED: uncharacterized protein LOC106323807 [Brassica oleracea var. oleracea]
BolSC21t60249H	0.593	0.000	0.000	0.000	0.216	0.000	0.000	0.000	0.204	unnamed protein product [Brassica oleracea]
BolSC21t60250H	0.000	0.000	0.000	0.000	0.000	0.000	0.000	0.000	0.000	unnamed protein product, partial [Brassica oleracea]
BolSC21t60251H	0.107	0.000	0.000	0.000	0.059	0.054	0.000	0.052	0.055	unnamed protein product [Brassica oleracea]
BolSC21t60252H	51.534	48.897	61.816	53.377	45.558	56.585	94.203	90.172	79.043	uncharacterized protein LOC111212954 [Brassica napus]
BolSC21t60253H	80.064	57.564	67.429	44.189	40.798	30.321	15.598	21.702	17.135	PREDICTED: brefeldin A-inhibited guanine nucleotide-exchange protein 5 [Brassica oleracea var. oleracea]
BolSC21t60254H	0.000	0.000	0.541	0.000	0.000	0.000	0.000	0.000	0.000	unnamed protein product [Brassica oleracea]
BolSC21t60255H	0.000	0.000	0.483	0.000	0.000	0.000	0.000	0.000	0.000	unnamed protein product [Brassica oleracea]
BolSC21t60256H	0.000	0.198	0.093	0.089	0.000	0.000	0.087	0.000	0.084	AT-rich interactive domain-containing protein 4 [Brassica napus]
BolSC21t60257H	14.999	15.187	10.986	16.617	13.188	13.379	24.858	23.290	27.166	BnaCnng11930D [Brassica napus]
BolSC21t60258H	0.000	0.000	0.000	0.000	0.000	0.000	0.000	0.000	0.000	endoglucanase 16-like [Brassica napus]
BolSC21t60259H	0.000	0.000	0.000	0.000	0.000	0.000	0.000	0.000	0.000	PREDICTED: molybdopterin synthase catalytic subunit-like [Raphanus sativus]
BolSC21t60260H	11.087	13.184	10.608	10.486	10.983	12.104	16.364	16.826	15.511	PREDICTED: endoribonuclease Dicer homolog 3 isoform X2 [Brassica oleracea var. oleracea]
BolSC21t60261H	0.000	0.000	0.000	0.000	0.000	0.361	0.000	1.047	0.000	unnamed protein product [Brassica rapa]
BolSC21t60262H	90.667	89.298	88.284	72.783	66.068	59.064	54.526	56.281	50.712	PREDICTED: nicalin-1-like [Brassica rapa]
BolSC21t60263H	0.000	0.000	0.155	0.000	0.000	0.000	0.000	0.000	0.000	unnamed protein product, partial [Brassica oleracea]
BolSC21t60264H	0.000	0.000	0.262	0.000	0.000	0.000	0.000	0.000	0.000	unnamed protein product, partial [Brassica oleracea]
BolSC21t60265H	0.000	0.000	0.000	0.000	0.000	0.000	0.000	0.000	0.000	BnaC03g53990D [Brassica napus]
BolSC21t60266H	0.000	0.000	0.000	0.000	0.000	0.000	0.000	0.000	0.000	PREDICTED: uncharacterized protein LOC103864190 [Brassica rapa]
BolSC21t60267H	0.000	0.000	0.000	0.000	0.000	0.000	0.000	0.000	0.000	unnamed protein product [Brassica rapa]
BolSC21t60268H	0.000	0.000	0.000	0.000	0.000	0.000	0.000	0.000	0.000	unnamed protein product [Brassica oleracea]
BolSC21t60269H	0.000	0.000	0.000	0.000	0.000	0.000	0.000	0.000	0.000	hypothetical protein DY000_00007137 [Brassica cretica]
BolSC21t60270H	0.000	0.000	0.000	0.000	0.000	0.000	0.000	0.000	0.000	PREDICTED: pentatricopeptide repeat-containing protein At3g53360, mitochondrial [Brassica rapa]
BolSC21t60271H	0.000	0.000	0.000	0.000	0.000	0.000	0.000	0.000	0.000	BnaC03g53960D [Brassica napus]
BolSC21t60272H	0.000	0.000	0.118	0.338	0.226	0.624	5.309	3.164	0.910	putative NAC domain-containing protein 61 [Brassica napus]
BolSC21t60273H	0.000	0.000	0.032	3.127	3.513	1.458	6.172	0.607	30.175	probable fatty acyl-CoA reductase 4 [Brassica napus]
BolSC21t60274H	48.036	40.637	45.140	55.127	57.479	69.663	126.922	133.776	105.429	PREDICTED: protein pleiotropic regulatory locus 1-like isoform X2 [Brassica oleracea var. oleracea]
BolSC21t60275H	0.000	0.000	0.000	0.000	0.000	0.000	0.000	0.000	0.000	unnamed protein product, partial [Brassica oleracea]
BolSC21t60276H	0.000	0.000	0.000	0.000	0.000	0.000	0.000	0.000	0.000	hypothetical protein F2Q68_00021119 [Brassica cretica]
BolSC21t60277H	0.000	0.000	0.000	0.000	0.000	0.000	0.000	0.000	0.000	BnaC02g25830D [Brassica napus]
BolSC21t60278H	0.129	0.000	0.000	1.820	1.406	0.259	0.825	0.375	0.665	PREDICTED: extradiol ring-cleavage dioxygenase-like [Brassica oleracea var. oleracea]
BolSC21t60279H	0.111	0.135	0.000	3.150	2.068	0.895	1.071	0.648	1.841	PREDICTED: extradiol ring-cleavage dioxygenase-like [Brassica oleracea var. oleracea]
BolSC21t60280H	0.000	0.000	0.000	0.000	0.000	0.000	0.000	0.000	0.000	unnamed protein product [Brassica oleracea]
BolSC21t60281H	0.000	0.000	0.000	0.000	0.000	0.000	0.000	0.000	0.000	uncharacterized protein LOC106373566 [Brassica napus]
BolSC21t60282H	0.312	1.137	0.780	3.392	6.472	5.388	2.398	2.843	2.062	PREDICTED: shugoshin-1 [Raphanus sativus]
BolSC21t60283H	9.407	10.940	14.597	7.776	5.784	7.315	8.767	6.291	10.943	unnamed protein product [Brassica oleracea]
BolSC21t60284H	6.166	7.071	5.447	6.329	6.729	8.596	7.677	6.639	9.548	unnamed protein product, partial [Brassica oleracea]
BolSC21t60285H	0.000	0.000	0.000	0.000	0.000	0.000	0.000	0.000	0.000	PREDICTED: mediator of DNA damage checkpoint protein 1 isoform X1 [Brassica rapa]
BolSC21t60286H	0.000	0.000	0.000	0.000	0.000	0.000	0.000	0.000	0.000	_
BolSC21t60287H	0.000	0.000	0.000	0.000	0.000	0.000	0.000	0.000	0.000	hypothetical protein F2Q70_00021789 [Brassica cretica]
BolSC21t60288H	0.000	0.000	0.000	0.000	0.000	0.000	0.000	0.000	0.000	PREDICTED: cation/H(+) antiporter 10-like [Brassica oleracea var. oleracea]
BolSC21t60289H	0.000	0.000	0.000	0.096	0.000	0.000	0.000	0.043	0.000	PREDICTED: putative phospholipid:diacylglycerol acyltransferase 2 [Camelina sativa]
BolSC21t60290H	0.000	0.000	0.000	0.000	0.000	0.000	0.000	0.000	0.000	PREDICTED: uncharacterized protein LOC106297409 [Brassica oleracea var. oleracea]
BolSC21t60291H	0.000	0.000	0.000	0.000	0.000	0.000	0.000	0.000	0.000	uncharacterized protein LOC106429422 [Brassica napus]
BolSC21t60292H	0.000	0.000	0.000	0.000	0.000	0.000	0.000	0.000	0.000	unnamed protein product [Brassica oleracea]
BolSC21t60293H	0.000	0.000	0.000	0.000	0.000	0.147	0.000	0.000	0.000	LOW QUALITY PROTEIN: jacalin-related lectin 20 [Arabidopsis lyrata subsp. lyrata]
BolSC21t60294H	1.124	1.164	1.239	6.464	4.688	2.886	5.325	2.914	6.107	arogenate dehydratase 4, chloroplastic-like [Brassica napus]
BolSC21t60295H	0.000	0.000	0.000	0.000	0.000	0.000	0.000	0.132	0.000	notchless protein homolog isoform X2 [Brassica napus]
BolSC21t60296H	0.000	0.000	0.000	0.000	0.000	0.000	0.000	0.000	0.000	hypothetical protein F2Q70_00011469 [Brassica cretica]
BolSC21t60297H	0.000	0.000	0.000	0.000	0.025	0.000	0.000	0.000	0.000	probable L-type lectin-domain containing receptor kinase I.6 [Brassica napus]
BolSC21t60298H	11.203	13.142	11.163	3.758	3.412	1.426	2.250	1.721	6.039	PREDICTED: asparagine synthetase [glutamine-hydrolyzing]-like isoform X1 [Brassica oleracea var. oleracea]
BolSC21t60299H	185.044	179.806	190.300	114.609	114.285	97.693	71.523	81.894	67.918	unnamed protein product [Brassica oleracea]
BolSC21t60300H	0.000	0.000	0.000	0.000	0.000	0.000	0.000	0.000	0.000	BnaC05g09110D [Brassica napus]
BolSC21t60301H	2.374	1.121	3.145	1.791	1.079	0.927	0.915	1.725	2.519	PREDICTED: E3 ubiquitin ligase BIG BROTHER-related [Brassica oleracea var. oleracea]
BolSC21t60302H	0.000	0.000	0.000	0.000	0.000	0.000	0.000	0.000	0.000	unnamed protein product [Brassica oleracea]
BolSC22t60303H	0.000	0.000	0.000	0.000	0.000	0.000	0.000	0.000	0.000	uncharacterized protein LOC111215837 [Brassica napus]
BolSC22t60304H	0.000	0.000	0.000	0.000	0.000	0.000	0.000	0.000	0.000	uncharacterized protein LOC106393460 [Brassica napus]
BolSC28t60305H	0.000	0.000	0.000	0.000	0.000	0.000	0.000	0.000	0.000	NADH dehydrogenase subunit 9 [Brassica oxyrrhina]
BolSC28t60306H	0.000	0.000	0.000	0.000	0.000	0.000	0.000	0.000	0.000	cytochrome c biogenesis protein ccmFN2 [Raphanus sativus]
BolSC28t60307H	0.000	0.000	0.000	0.000	0.000	0.000	0.000	0.000	0.000	FO-ATPase subunit 6, partial [Brassica napus]
BolSC28t60308H	0.160	0.194	0.725	0.000	0.000	0.000	0.000	0.000	0.000	predicted protein [Arabidopsis lyrata subsp. lyrata]
BolSC28t60309H	0.000	0.295	0.069	0.132	0.066	0.061	0.065	0.059	0.063	ATP synthase protein MI25 [Morella rubra]
BolSC28t60310H	1.652	1.672	1.564	0.599	0.150	0.276	0.147	0.133	0.000	orf101b [Brassica carinata]
BolSC28t60311H	0.000	0.000	0.000	0.000	0.000	0.000	0.000	0.000	0.000	cytochrome oxidase subunit 1-2 [Daucus carota]
BolSC28t60312H	0.000	0.000	0.000	0.000	0.000	0.000	0.000	0.000	0.000	hypothetical chloroplast RF19 [Cakile arabica]
BolSC28t60313H	1.829	1.110	0.816	0.000	0.143	0.197	0.209	0.127	0.000	NADH dehydrogenase subunit 2 [Brassica nigra]
BolSC28t60314H	1.363	2.036	0.833	0.000	0.114	0.316	0.000	0.102	0.000	NADH dehydrogenase subunit 2 [Arabis alpina]
BolSC28t60315H	0.793	0.441	0.263	0.144	0.036	0.597	0.141	0.160	0.102	ribosomal protein small subunit 3 [Brassica oxyrrhina]
BolSC28t60316H	0.156	0.095	0.089	0.000	0.000	0.235	0.000	0.000	0.000	ribosomal protein L16 [Arabidopsis thaliana]
BolSC28t60317H	0.000	0.000	0.000	0.000	0.000	0.000	0.000	0.000	0.000	ribosomal protein L5 [Arabis alpina]
BolSC28t60318H	0.287	0.000	0.651	0.311	0.000	0.000	0.306	0.278	0.000	unnamed protein product [Brassica oleracea]
BolSC28t60319H	0.095	0.402	0.054	0.000	0.000	0.000	0.000	0.000	0.000	cytochrome c oxidase subunit 2-1 [Brassica juncea var. tumida]
BolSC28t60320H	0.057	0.069	0.064	0.185	0.062	0.000	0.000	0.000	0.000	cytochrome c biogenesis ccmC [Schrenkiella parvula]
BolSC28t60321H	0.665	0.706	0.378	0.271	0.272	0.083	0.266	0.000	0.000	NADH dehydrogenase subunit 2 [Brassica juncea]
BolSC28t60322H	0.890	0.376	0.439	0.210	0.169	0.233	0.165	0.037	0.000	ribosomal protein S4 [Boechera stricta]
BolSC28t60323H	0.900	0.656	0.818	0.000	0.000	0.000	0.000	0.000	0.000	ORF105B protein [Turritis glabra]
BolSC28t60324H	1.329	1.037	1.186	0.309	0.104	0.572	0.101	0.184	0.000	Nad7 [Utricularia reniformis]
BolSC28t60325H	1.155	1.705	1.382	0.780	0.886	1.472	0.233	0.363	0.193	hypothetical protein E3N88_44230 [Mikania micrantha]
BolSC28t60326H	1.024	0.855	0.763	0.382	0.489	0.706	0.478	0.155	0.000	ATPase subunit 8 [Lepidium densiflorum]
BolSC28t60327H	0.108	0.198	0.062	0.000	0.000	0.000	0.000	0.000	0.000	orf314 [Eruca vesicaria subsp. sativa]
BolSC28t60328H	1.264	1.705	2.074	0.611	0.153	0.141	0.150	0.408	0.000	NADH dehydrogenase subunit 1, partial [Arabidopsis thaliana]
BolSC28t60329H	0.542	0.228	0.237	0.068	0.000	0.188	0.044	0.000	0.043	maturase, partial [Brassica nigra]
BolSC28t60330H	0.000	0.000	0.000	0.000	0.000	0.000	0.000	0.000	0.000	unnamed protein product [Brassica rapa]
BolSC28t60331H	0.204	0.124	0.231	0.000	0.222	0.102	0.000	0.000	0.000	orf159 [Brassica carinata]
BolSC28t60332H	18.800	3.760	5.150	3.365	6.397	9.768	6.491	1.286	0.343	unnamed protein product [Arabidopsis thaliana]
BolSC28t60333H	2.734	1.030	1.499	1.024	1.440	2.649	1.911	0.457	0.000	ribosomal protein S7 [Morus notabilis]
BolSC28t60334H	0.826	1.003	1.689	0.000	0.000	0.000	0.000	0.000	0.000	unnamed protein product [Brassica oleracea]
BolSC28t60335H	0.000	0.000	0.000	0.000	0.000	0.000	0.000	0.000	0.000	unknown, partial [Arabidopsis thaliana]
BolSC28t60336H	3.423	0.959	1.695	0.477	0.383	0.441	0.375	0.255	0.272	NADH-ubiquinone oxidoreductase chain 1 [Spatholobus suberectus]
BolSC28t60337H	3.703	3.721	4.785	0.833	0.418	1.025	0.681	0.742	0.000	unnamed protein product [Brassica rapa]
BolSC28t60338H	0.000	0.000	0.077	0.000	0.000	0.068	0.073	0.000	0.000	NADH dehydrogenase subunit 6 [Hemiptelea davidii]
BolSC28t60339H	0.214	0.052	0.438	0.000	0.047	0.043	0.000	0.000	0.000	ribulose-1,5-bisphosphate carboxylase/oxygenase large subunit, partial [Cleomella sparsifolia]
BolSC28t60340H	0.125	0.000	0.107	0.000	0.000	0.000	0.000	0.000	0.000	orf448 [Brassica carinata]
BolSC28t60341H	0.000	0.141	0.264	0.000	0.127	0.000	0.000	0.000	0.000	unnamed protein product [Brassica rapa]
BolSC28t60342H	1.976	1.842	2.124	0.537	0.308	0.496	0.113	0.137	0.146	BnaCnng12400D [Brassica napus]
BolSC28t60343H	3.128	2.085	0.488	0.267	0.000	0.185	0.000	0.059	0.063	NADH dehydrogenase subunit 4 [Ammopiptanthus mongolicus]
BolSC28t60344H	5.936	2.461	3.453	1.495	1.422	2.398	0.232	0.842	0.673	hypothetical protein VITISV_038988 [Vitis vinifera]
BolSC28t60345H	0.752	0.406	1.139	0.000	0.000	0.000	0.000	0.000	0.000	unnamed protein product [Brassica oleracea]
BolSC28t60346H	1.422	0.540	1.413	0.097	0.097	0.000	0.000	0.000	0.000	unnamed protein product [Microthlaspi erraticum]
BolSC28t60347H	1.801	1.530	1.718	0.157	0.275	0.542	0.115	0.105	0.000	Nucleic acid-binding, OB-fold-like protein [Arabidopsis thaliana]
BolSC28t60348H	0.145	0.703	0.164	0.000	0.000	0.000	0.000	0.000	0.000	unnamed protein product [Brassica oleracea]
BolSC28t60349H	0.000	0.000	0.000	0.000	0.000	0.000	0.000	0.000	0.000	orf121b [Eruca vesicaria subsp. sativa]
BolSC28t60350H	0.380	0.230	0.000	0.000	0.000	0.000	0.000	0.000	0.000	unnamed protein product [Brassica oleracea]
BolSC28t60351H	12.303	3.995	4.710	2.344	1.931	3.746	2.567	1.018	0.285	ATPase subunit 1 [Arabidopsis thaliana]
BolSC28t60352H	0.051	0.124	0.000	0.000	0.000	0.000	0.000	0.000	0.000	orf112 [Brassica rapa subsp. oleifera]
BolSC28t60353H	0.826	0.000	0.313	0.299	0.000	0.000	0.000	0.000	0.000	unnamed protein product, partial [Brassica rapa]
BolSC28t60354H	2.646	1.977	2.312	0.074	0.074	0.409	0.434	0.066	0.070	cytochrome c biogenesis protein ccmB [Brassica oxyrrhina]
BolSC28t60355H	9.920	6.902	7.596	2.665	2.433	10.070	6.780	3.132	1.726	ribosomal protein S12 [Arabis alpina]
BolSC28t60356H	9.363	6.963	4.785	3.053	3.321	12.453	3.872	2.382	0.967	NADH dehydrogenase subunit 3 [Carica papaya]
BolSC28t60357H	5.492	4.701	4.039	1.027	0.983	4.428	0.769	0.698	0.465	transmembrane protein [Arabidopsis thaliana]
BolSC28t60358H	3.706	2.132	2.880	0.424	0.000	0.000	0.000	0.000	0.000	unnamed protein product, partial [Brassica rapa]
BolSC28t60359H	0.496	0.201	0.563	0.000	0.000	0.000	0.000	0.000	0.000	orf108c [Sinapis arvensis]
BolSC28t60360H	2.092	0.726	0.339	0.000	0.000	0.000	0.000	0.000	0.000	unnamed protein product [Brassica oleracea]
BolSC28t60361H	8.815	3.356	5.515	1.786	1.060	3.449	0.319	0.579	0.154	NADH dehydrogenase subunit 5 [Brassica juncea]
BolSC28t60362H	1.124	0.455	1.276	0.271	0.477	0.689	0.266	0.000	0.064	NADH dehydrogenase subunit 9 [Brassica oxyrrhina]
BolSC28t60363H	4.251	2.744	3.239	0.175	0.059	0.432	0.230	0.156	0.056	cytochrome c biogenesis protein ccmFN2 [Raphanus sativus]
BolSC28t60364H	0.804	0.651	1.461	0.350	0.468	0.484	0.057	0.052	0.055	FO-ATPase subunit 6, partial [Brassica napus]
BolSC28t60365H	0.608	0.295	0.138	0.198	0.199	0.366	0.130	0.118	0.000	ATP synthase protein MI25 [Morella rubra]
BolSC28t60366H	0.000	0.167	0.156	0.000	0.000	0.000	0.000	0.000	0.000	orf101b [Brassica carinata]
BolSC28t60367H	0.904	0.291	0.211	0.202	0.029	0.374	0.170	0.026	0.000	cytoplasmic male sterility-associated cytochrome oxidase subunit I [Brassica juncea]
BolSC28t60368H	0.000	0.000	0.000	0.000	0.000	0.000	0.000	0.000	0.000	hypothetical chloroplast RF19 [Cakile arabica]
BolSC28t60369H	0.000	0.000	0.000	0.000	0.000	0.000	0.000	0.000	0.000	NADH dehydrogenase subunit 2 [Arabis alpina]
BolSC28t60370H	1.873	2.842	2.924	0.000	0.000	0.235	0.000	0.000	0.000	NADH dehydrogenase subunit 2 [Cinnamomum micranthum f. kanehirae]
BolSC28t60371H	0.647	0.484	0.509	0.027	0.027	0.025	0.080	0.024	0.000	ribosomal protein S3 [Physaria ludoviciana]
BolSC28t60372H	0.906	0.458	0.343	0.574	0.577	1.061	0.242	0.220	0.000	ribosomal protein L5 [Brassica juncea]
BolSC28t60373H	0.470	0.456	0.267	0.153	0.051	0.424	0.351	0.091	0.048	apocytochrome b [Batis maritima]
BolSC28t60374H	0.000	0.000	0.000	0.000	0.000	0.000	0.000	0.000	0.000	cytochrome c oxidase subunit 2-1 [Brassica juncea var. tumida]
BolSC28t60375H	0.000	0.000	0.000	0.000	0.000	0.000	0.000	0.000	0.000	unnamed protein product [Brassica oleracea]
BolSC28t60376H	1.170	0.294	0.275	0.132	0.176	0.122	0.129	0.196	0.000	CcmFC [Bombax ceiba]
BolSC28t60377H	0.000	0.000	0.259	0.000	0.000	0.000	0.000	0.000	0.000	unknown protein [Arabidopsis thaliana]
BolSC28t60378H	0.000	0.000	0.153	0.000	0.000	0.000	0.000	0.000	0.000	orf146 [Brassica oleracea]
BolSC28t60379H	1.478	0.962	2.099	0.689	1.210	1.590	1.352	0.716	0.055	cytochrome c oxidase subunit 3 [Brassica oxyrrhina]
BolSC28t60380H	0.000	0.000	0.000	0.000	0.000	0.000	0.000	0.000	0.000	hypothetical protein EUTSA_v10002987mg, partial [Eutrema salsugineum]
BolSC28t60381H	0.216	0.656	0.614	0.117	0.236	0.108	0.000	0.000	0.000	NADH dehydrogenase subunit 5, mitochondrial [Tanacetum cinerariifolium]
BolSC28t60382H	0.000	0.000	0.000	0.000	0.000	0.000	0.000	0.000	0.000	NADH dehydrogenase subunit 1 [Vaccinium macrocarpon]
BolSC28t60383H	0.000	0.000	0.000	0.000	0.000	0.000	0.000	0.000	0.000	cytochrome c assembly protein [Sinapis arvensis]
BolSC28t60384H	0.000	0.000	0.000	0.000	0.000	0.000	0.000	0.000	0.000	H+-transporting two-sector ATPase (EC 3.6.3.14) chain 9.1 - radish mitochondrion [Raphanus sativus]
BolSC28t60385H	0.000	0.000	0.000	0.000	0.000	0.000	0.000	0.000	0.000	NADH dehydrogenase subunit 5 [Brassica juncea]
BolSC28t60386H	0.000	0.000	0.000	0.000	0.000	0.000	0.000	0.000	0.000	NADH dehydrogenase subunit 5 [Ammopiptanthus nanus]
BolSC28t60387H	0.000	0.000	0.000	0.000	0.000	0.000	0.000	0.000	0.000	ORF111 protein [Turritis glabra]
BolSC28t60388H	0.000	0.000	0.000	0.000	0.000	0.000	0.000	0.000	0.000	cytochrome c oxidase subunit 2 [Brassica napus]
BolSC28t60389H	0.000	0.000	0.000	0.000	0.000	0.000	0.000	0.000	0.000	cytochrome c oxidase subunit II [Sinapis arvensis]
BolSC28t60390H	0.062	0.000	0.000	0.000	0.000	0.000	0.000	0.000	0.000	cytochrome c biogenesis ccmC [Schrenkiella parvula]
BolSC28t60391H	0.661	0.602	0.375	0.000	0.000	0.000	0.000	0.000	0.000	cytochrome c oxidase subunit 2 [Raphanus sativus]
BolSC28t60392H	1.470	1.785	1.855	1.065	0.356	1.967	0.523	0.475	0.169	H+-transporting two-sector ATPase (EC 3.6.3.14) chain 9.1 - radish mitochondrion [Raphanus sativus]
BolSC28t60393H	0.000	0.000	0.000	0.000	0.000	0.000	0.000	0.000	0.000	unnamed protein product [Brassica oleracea]
BolSC28t60394H	0.000	0.000	0.000	0.000	0.000	0.000	0.000	0.000	0.000	Ribulose bisphosphate carboxylase large chain [Capsicum annuum]
BolSC28t60395H	0.000	0.000	0.000	0.000	0.000	0.000	0.000	0.000	0.000	orf225 [Sinapis arvensis]
BolSC28t60396H	0.000	0.000	0.000	0.000	0.000	0.000	0.000	0.000	0.000	unnamed protein product [Brassica oleracea]
BolSC28t60397H	0.000	0.083	0.000	0.148	0.000	0.068	0.000	0.000	0.000	NADH dehydrogenase subunit 6 [Hemiptelea davidii]
BolSC28t60398H	0.000	0.000	0.000	0.000	0.000	0.000	0.000	0.000	0.000	unnamed protein product [Brassica rapa]
BolSC28t60399H	0.000	0.000	0.000	0.000	0.000	0.000	0.000	0.000	0.000	PREDICTED: LOW QUALITY PROTEIN: uncharacterized protein LOC100853704, partial [Vitis vinifera]
BolSC28t60400H	0.000	0.213	0.000	0.000	0.000	0.000	0.000	0.000	0.000	NADH-ubiquinone oxidoreductase chain 1 [Spatholobus suberectus]
BolSC28t60401H	0.000	0.000	0.000	0.000	0.000	0.000	0.000	0.000	0.000	unknown, partial [Arabidopsis thaliana]
BolSC28t60402H	1.322	0.803	1.689	0.000	0.000	0.166	0.000	0.000	0.000	unnamed protein product [Brassica oleracea]
BolSC28t60403H	0.000	0.000	0.000	0.000	0.000	0.000	0.000	0.000	0.000	orf161 [Brassica rapa subsp. oleifera]
BolSC28t60404H	0.153	0.000	0.087	0.083	0.000	0.154	0.000	0.000	0.000	maturase, partial [Trifolium pratense]
BolSC28t60405H	0.000	0.000	0.000	0.000	0.000	0.000	0.000	0.000	0.000	maturase, partial [Eutrema salsugineum]
BolSC28t60406H	0.111	0.000	0.000	0.000	0.000	0.000	0.000	0.000	0.000	NADH dehydrogenase subunit 5 [Brassica juncea]
BolSC28t60407H	0.463	0.000	0.000	0.000	0.000	0.000	0.000	0.000	0.000	ORF111 protein [Turritis glabra]
BolSC28t60408H	0.000	0.000	0.000	0.228	0.000	0.000	0.000	0.000	0.000	cytochrome c oxidase subunit II [Sinapis arvensis]
BolSC28t60409H	0.000	0.000	0.000	0.000	0.000	0.000	0.000	0.000	0.000	unnamed protein product [Brassica oleracea]
BolSC28t60410H	0.887	0.737	0.477	0.203	0.458	0.422	0.000	0.045	0.096	cytochrome c-type biogenesis protein CcmF, mitochondrion [Artemisia annua]
BolSC28t60411H	4.256	1.766	1.934	0.424	0.116	0.249	0.114	0.172	0.037	cytochrome c biogenesis orf452 [Arabidopsis thaliana]
BolSC28t60412H	5.006	1.520	2.053	2.116	3.490	3.489	2.374	1.078	0.287	orf101e [Eruca vesicaria subsp. sativa]
BolSC28t60413H	1.003	0.256	0.360	0.516	0.346	0.689	0.620	0.205	0.055	cytochrome c oxidase subunit 3 [Brassica oxyrrhina]
BolSC28t60414H	0.000	0.000	0.000	0.000	0.000	0.000	0.000	0.000	0.000	hypothetical protein EUTSA_v10002987mg, partial [Eutrema salsugineum]
BolSC28t60415H	0.073	0.177	0.413	0.000	0.000	0.000	0.000	0.000	0.000	NADH dehydrogenase subunit 1 [Vaccinium macrocarpon]
BolSC28t60416H	0.194	0.000	0.000	0.000	0.000	0.000	0.000	0.000	0.000	cytochrome c biogenesis orf382 [Arabidopsis thaliana]
BolSC28t60417H	0.000	0.059	0.000	0.000	0.027	0.000	0.000	0.000	0.000	RNA polymerase beta subunit [Brassica rapa]
BolSC28t60418H	0.163	0.793	0.185	0.710	0.356	1.147	0.174	0.316	0.000	H+-transporting two-sector ATPase (EC 3.6.3.14) chain 9.1 - radish mitochondrion [Raphanus sativus]
BolSC28t60419H	0.661	0.803	0.563	0.000	0.000	0.663	0.000	0.000	0.000	NADH dehydrogenase subunit 5 [Spondias mombin]
BolSC28t60420H	0.242	0.196	0.244	0.438	0.293	0.297	0.086	0.052	0.083	NADH dehydrogenase subunit 5 [Brassica juncea]
BolSC28t60421H	0.000	0.000	0.000	0.000	0.000	0.000	0.000	0.000	0.000	ORF111 protein [Turritis glabra]
BolSC28t60422H	0.000	0.000	0.000	0.000	0.000	0.000	0.000	0.000	0.000	cytochrome c biogenesis protein ccmC [Brassica nigra]
BolSC28t60423H	0.884	0.119	0.223	0.000	0.000	0.493	0.000	0.000	0.000	NADH dehydrogenase subunit 2 [Arabis alpina]
BolSC28t60424H	0.000	0.000	0.000	0.000	0.000	0.000	0.000	0.000	0.000	ribosomal protein S4 [Boechera stricta]
BolSC28t60425H	0.000	0.000	0.000	0.000	0.000	0.000	0.000	0.000	0.000	ORF105B protein [Turritis glabra]
BolSC28t60426H	0.000	0.000	0.000	0.000	0.000	0.000	0.000	0.000	0.000	Nad7 [Utricularia reniformis]
BolSC28t60427H	1.706	1.944	1.222	0.770	0.802	1.054	0.252	0.331	0.325	hypothetical protein E3N88_44230 [Mikania micrantha]
BolSC28t60428H	0.000	0.000	0.000	0.000	0.000	0.000	0.000	0.000	0.000	nad7 [Brassica juncea]
BolSC28t60429H	0.000	0.000	0.000	0.000	0.000	0.000	0.000	0.000	0.000	PREDICTED: LOW QUALITY PROTEIN: uncharacterized mitochondrial protein AtMg00500 [Brassica oleracea var. oleracea]
BolSC28t60430H	0.000	0.000	0.000	0.449	0.000	0.000	0.000	0.000	0.000	ATPase subunit 8 [Lepidium densiflorum]
BolSC28t60431H	1.796	0.727	1.051	0.177	0.119	0.164	0.000	0.000	0.000	orf287 [Brassica oleracea var. botrytis]
BolSC28t60432H	0.000	0.000	0.000	0.000	0.000	0.000	0.000	0.000	0.000	NADH dehydrogenase subunit 1, partial [Arabidopsis thaliana]
BolSC28t60433H	0.042	0.102	0.000	0.000	0.000	0.000	0.000	0.041	0.000	maturase, partial [Brassica nigra]
BolSC28t60434H	0.595	0.723	0.270	0.259	0.130	0.239	0.000	0.000	0.000	unnamed protein product [Brassica rapa]
BolSC28t60435H	0.255	0.000	0.290	0.000	0.000	0.256	0.000	0.000	0.000	unnamed protein product [Brassica oleracea]
BolSC28t60436H	0.227	0.275	0.000	0.000	0.247	0.227	0.000	0.000	0.000	unnamed protein product [Brassica oleracea]
BolSC28t60437H	0.000	0.000	0.000	0.000	0.000	0.000	0.000	0.000	0.000	ribosomal protein S7 [Morus notabilis]
BolSC28t60438H	0.000	0.219	0.205	0.000	0.000	0.181	0.000	0.000	0.000	NADH dehydrogenase subunit 4 [Cleomella serrulata]
BolSC28t60439H	0.000	0.000	0.000	0.000	0.000	0.220	0.000	0.000	0.000	NADH dehydrogenase subunit 4 [Arabidopsis thaliana]
BolSC28t60440H	0.000	0.284	0.000	0.000	0.000	0.000	0.000	0.000	0.000	NADH-ubiquinone oxidoreductase chain, putative [Ricinus communis]
BolSC29t60441H	0.000	0.000	0.000	0.000	0.000	0.000	0.000	0.000	0.000	ribosomal protein L23 [Chaenomeles speciosa]
BolSC29t60442H	0.000	0.000	0.000	0.000	0.000	0.000	0.000	0.000	0.000	ribosomal protein L2 [Pluchea indica]
BolSC29t60443H	0.000	0.000	0.000	0.000	0.000	0.000	0.000	0.000	0.000	photosystem II D1 protein, partial [Sagittaria montevidensis]
BolSC29t60444H	0.000	0.000	0.000	0.000	0.000	0.000	0.000	0.000	0.000	maturase K [Brassica oleracea]
BolSC29t60445H	0.000	0.000	0.000	0.000	0.000	0.000	0.000	0.000	0.000	unnamed protein product, partial [Brassica oleracea]
BolSC29t60446H	0.000	0.000	0.000	0.000	0.000	0.000	0.000	0.000	0.000	AtpA [Brassica oleracea var. italica]
BolSC29t60447H	0.140	0.682	0.000	0.000	0.460	2.538	2.698	0.680	0.000	ATP synthase CF0 B subunit [Arabidopsis lyrata subsp. lyrata]
BolSC29t60448H	0.000	0.000	0.000	0.000	0.000	0.000	0.000	0.000	0.000	_
BolSC29t60449H	0.000	0.000	0.000	0.000	0.000	0.000	0.000	0.000	0.000	ATP synthase CF0 A subunit [Ionopsidium megalospermum]
BolSC29t60450H	0.000	0.000	0.000	0.000	0.000	0.000	0.000	0.000	0.000	ribosomal protein S2 [Bunias orientalis]
BolSC29t60451H	0.048	0.019	0.036	0.000	0.000	0.032	0.000	0.000	0.000	RpoC2 [Raphanus sativus var. raphanistroides]
BolSC29t60452H	0.000	0.000	0.000	0.000	0.000	0.000	0.000	0.000	0.000	photosystem II reaction center protein M [Brassica oleracea var. italica]
BolSC29t60453H	0.025	0.000	0.000	0.027	0.027	0.098	0.052	0.048	0.000	photosynthetic reaction centre, L/M, Photosystem antenna protein-like protein, plastid [Artemisia annua]
BolSC29t60454H	0.000	0.000	0.000	0.000	0.243	0.000	0.000	0.000	0.000	photosystem II protein Z [Santalum boninense]
BolSC29t60455H	0.000	0.000	0.000	0.000	0.096	0.382	0.094	0.000	0.000	photosystem I P700 chlorophyll a apoprotein A2 [Cochlearia scotica]
BolSC29t60456H	0.093	0.000	0.106	0.000	0.305	0.467	0.397	0.180	0.000	photosystem I P700 apoprotein A1 [Ludwigia octovalvis]
BolSC29t60457H	0.000	0.205	0.000	0.184	0.000	0.000	0.000	0.000	0.000	hypothetical chloroplast RF34 [Plagiobothrys nothofulvus]
BolSC29t60458H	0.000	0.000	0.000	0.000	0.000	0.000	0.000	0.000	0.000	ribosomal protein S4 [Sinalliaria limprichtiana]
BolSC29t60459H	0.000	0.000	0.000	0.000	0.000	0.118	0.000	0.000	0.000	NADH-plastoquinone oxidoreductase subunit J [Morettia canescens]
BolSC29t60460H	0.000	0.000	0.000	0.000	0.000	0.000	0.000	0.000	0.000	unnamed protein product [Brassica oleracea]
BolSC29t60461H	0.000	0.000	0.000	0.000	0.000	0.000	0.000	0.000	0.000	unnamed protein product [Brassica oleracea]
BolSC29t60462H	0.000	0.000	0.000	0.115	0.346	0.530	0.113	0.102	0.000	ATPase epsilon subunit [Lepidium virginicum]
BolSC29t60463H	0.000	0.000	0.000	0.000	0.071	0.197	0.139	0.000	0.067	AtpB [Brassica nigra]
BolSC29t60464H	0.029	0.000	0.033	0.254	0.224	0.822	0.656	0.142	0.030	ribulose 1,5-bisphosphate carboxylase/oxygenase large subunit [Crambe hispanica subsp. abyssinica]
BolSC29t60465H	0.046	0.056	0.000	0.050	0.101	0.000	0.000	0.000	0.048	RecName: Full=Acetyl-coenzyme A carboxylase carboxyl transferase subunit beta, chloroplastic; Short=ACCase subunit beta; Short=Acetyl-CoA carboxylase carboxyltransferase subunit beta [Brassica napus]
BolSC29t60466H	0.000	0.000	0.000	0.000	0.000	1.113	0.000	0.358	0.000	photosystem I subunit VIII [Chorispora tenella]
BolSC29t60467H	0.076	0.093	0.000	0.000	0.000	0.077	0.163	0.000	0.079	photosystem I assembly protein Ycf4 [Thlaspi arvense]
BolSC29t60468H	0.000	0.257	0.000	0.230	0.154	0.283	0.000	0.205	0.000	cytochrome f [Isatis tinctoria]
BolSC29t60469H	0.000	0.000	0.000	0.000	0.374	1.375	0.000	0.332	0.000	PsbJ [Heracleum candicans]
BolSC29t60470H	0.720	1.312	0.000	0.000	0.393	0.361	0.384	1.047	0.744	photosystem II protein L [Lespedeza floribunda]
BolSC29t60471H	0.702	1.279	0.000	0.000	0.383	0.000	1.124	1.021	1.812	photosystem II cytochrome b559 beta chain [Solenopsis bivonae]
BolSC29t60472H	0.502	0.812	0.190	0.000	0.365	0.336	1.071	1.296	1.726	cytochrome b559 alpha chain [Dipteronia sinensis]
BolSC29t60473H	0.000	0.000	0.000	0.402	0.000	0.371	0.000	0.000	0.000	cytochrome b6-F complex subunit 5 [Medicago truncatula]
BolSC29t60474H	0.000	0.000	0.000	0.000	0.000	0.000	0.000	0.000	0.000	PSI J protein [Clausia aprica]
BolSC29t60475H	0.000	0.000	0.238	0.000	0.229	0.210	0.000	0.000	0.000	ribosomal protein L33 [Ricotia cretica]
BolSC29t60476H	0.000	0.000	0.000	0.000	0.000	0.000	0.000	0.000	0.000	30S ribosomal protein S18 [Turritis glabra]
BolSC29t60477H	0.000	0.000	0.000	0.000	0.000	0.000	0.000	0.000	0.000	ribosomal protein L20 [Brassica juncea subsp. integrifolia]
BolSC29t60478H	0.000	0.000	0.000	0.000	0.000	0.000	0.000	0.000	0.000	ribosomal protein S12 [Ranunculus austro-oreganus]
BolSC29t60479H	0.096	0.117	0.109	0.105	0.525	0.097	0.000	0.093	0.000	ClpP [Raphanus sativus var. raphanistroides]
BolSC29t60480H	0.000	0.517	0.725	0.000	0.929	0.214	0.681	0.206	0.879	ATP-dependent protease subunit [Ricotia cretica]
BolSC29t60481H	0.000	0.000	0.000	0.000	0.000	0.000	0.000	0.000	0.000	Photosystem antenna protein-like protein [Corchorus capsularis]
BolSC29t60482H	0.000	0.000	0.000	0.000	0.000	0.829	0.441	0.400	0.000	photosystem II protein T [Eutrema tenue]
BolSC29t60483H	0.000	0.000	0.000	0.000	0.000	0.000	0.000	0.000	0.000	photosystem II protein N [Paris tetraphylla]
BolSC29t60484H	0.000	0.000	0.000	0.000	0.000	0.000	0.000	0.000	0.000	photosystem II protein H [Arabis hirsuta]
BolSC29t60485H	0.000	0.000	0.000	0.000	0.000	0.000	0.000	0.000	0.000	RpoA [Brassica juncea subsp. integrifolia]
BolSC29t60486H	0.198	0.600	0.000	0.107	0.108	0.000	0.000	0.000	0.102	ribosomal protein S11 [Ionopsidium megalospermum]
BolSC29t60487H	0.000	0.000	0.000	0.000	0.000	0.000	0.000	0.000	0.000	ribosomal protein L2 [Sinalliaria limprichtiana]
BolSC29t60488H	0.000	0.000	0.000	0.000	0.000	0.000	0.000	0.000	0.000	ribosomal protein L23 [Chaenomeles speciosa]
BolSC29t60489H	0.000	0.000	0.000	0.000	0.000	0.000	0.000	0.000	0.000	Ycf2 [Brassica nigra]
BolSC29t60490H	0.000	0.000	0.000	0.000	0.000	0.000	0.000	0.000	0.000	unnamed protein product [Brassica oleracea]
BolSC29t60491H	0.000	0.000	0.000	0.000	0.000	0.000	0.000	0.000	0.000	ycf2 [Brassica napus]
BolSC29t60492H	0.000	0.000	0.000	0.000	0.000	0.000	0.000	0.000	0.000	ycf2 [Brassica napus]
BolSC29t60493H	0.000	0.000	0.000	0.000	0.000	0.000	0.000	0.000	0.000	ORF77 [Isatis tinctoria]
BolSC29t60494H	0.000	0.103	0.048	0.000	0.000	0.000	0.000	0.041	0.000	NdhB [Brassica juncea subsp. integrifolia]
BolSC29t60495H	0.000	0.000	0.000	0.000	0.000	0.000	0.000	0.000	0.000	ribosomal protein S7 [Panax quinquefolius]
BolSC29t60496H	0.000	0.000	0.000	0.000	0.000	0.000	0.000	0.000	0.000	unnamed protein product [Brassica oleracea]
BolSC29t60497H	0.000	0.000	0.000	0.058	0.117	0.375	0.000	0.000	0.000	unnamed protein product, partial [Brassica oleracea]
BolSC29t60498H	0.223	0.000	0.000	0.000	0.243	0.895	0.000	0.000	0.000	hypothetical protein E3N88_13121 [Mikania micrantha]
BolSC29t60499H	0.385	0.234	0.437	0.836	1.890	4.055	1.232	2.424	1.192	unnamed protein product [Microthlaspi erraticum]
BolSC29t60500H	0.000	0.000	0.000	0.000	0.000	0.000	0.000	0.000	0.000	Ycf1 [Brassica oleracea var. italica]
BolSC29t60501H	0.000	0.000	0.000	0.000	0.000	0.000	0.053	0.000	0.000	NdhF [Brassica oleracea var. capitata]
BolSC29t60502H	0.000	0.000	0.000	0.288	0.289	0.798	0.000	0.770	0.547	ribosomal protein L32 [Neotorularia korolkowii]
BolSC29t60503H	0.000	0.000	0.000	0.000	0.000	0.000	0.000	0.000	0.000	cytochrome c biogenesis protein [Sisymbrium irio]
BolSC29t60504H	0.000	0.000	0.000	0.031	0.000	0.056	0.030	0.000	0.000	NdhD [Raphanus sativus var. sativus]
BolSC29t60505H	0.000	0.000	0.000	0.000	0.000	0.000	0.000	0.000	0.000	photosystem I subunit VII [Aconitum sinomontanum]
BolSC29t60506H	0.000	0.000	0.000	0.000	0.000	0.000	0.000	0.000	0.000	NADH dehydrogenase ND4L [Draba nemorosa]
BolSC29t60507H	0.000	0.000	0.090	0.000	0.000	0.000	0.085	0.154	0.000	NdhG [Brassica napus var. napus]
BolSC29t60508H	0.000	0.000	0.000	0.000	0.000	0.000	0.000	0.000	0.000	NADH dehydrogenase 18 kDa subunit [Arabis hirsuta]
BolSC29t60509H	0.065	0.000	0.000	0.071	0.071	0.131	0.069	0.000	0.000	NdhA [Brassica juncea subsp. integrifolia]
BolSC29t60510H	0.000	0.000	0.000	0.000	0.047	0.000	0.000	0.000	0.000	NADH dehydrogenase subunit 7 [Sisymbrium irio]
BolSC29t60511H	0.000	0.000	0.000	0.000	0.000	0.000	0.000	0.000	0.000	ribosomal protein S15 [Brassica napus]
BolSC29t60512H	0.000	0.000	0.000	0.000	0.000	0.000	0.000	0.000	0.000	hypothetical chloroplast RF19 [Brassica oleracea var. italica]
BolSC29t60513H	0.000	0.000	0.000	0.000	0.000	0.000	0.000	0.000	0.000	ycf1 [Arabidopsis arenosa]
BolSC29t60514H	0.000	0.000	0.000	0.000	0.000	0.000	0.000	0.000	0.000	metallocarboxypeptidase inhibitor [Tanacetum cinerariifolium]
BolSC29t60515H	0.000	0.000	0.000	0.000	0.000	0.000	0.000	0.000	0.000	ribosomal protein S12 [Abies chensiensis]
BolSC29t60516H	0.000	0.000	0.000	0.000	0.000	0.000	0.000	0.000	0.000	30S ribosomal protein S7 [Campynema lineare]
BolSC29t60517H	0.000	0.000	0.000	0.000	0.000	0.000	0.000	0.056	0.000	unnamed protein product [Brassica rapa]
BolSC29t60518H	0.000	0.000	0.000	0.000	0.000	0.000	0.000	0.000	0.000	Ycf2 [Brassica nigra]
BolSC29t60519H	0.000	0.000	0.000	0.000	0.000	0.000	0.000	0.000	0.000	ribosomal protein L23 [Chaenomeles speciosa]
BolSC29t60520H	0.000	0.000	0.000	0.000	0.000	0.000	0.000	0.000	0.000	ribosomal protein L2 [Pluchea indica]
BolSC29t60521H	0.000	0.000	0.124	0.118	0.000	0.656	0.000	0.000	0.000	PSII D1 protein [Prunus yedoensis]
BolSC29t60522H	0.000	0.000	0.000	0.000	0.000	0.000	0.000	0.000	0.000	ribosomal protein S16 [Farsetia stylosa]
BolSC29t60523H	0.000	0.000	0.000	0.000	0.000	0.000	0.000	0.000	0.000	photosystem II protein K [Orychophragmus taibaiensis]
BolSC29t60524H	0.000	0.000	0.000	0.000	0.000	0.000	0.000	0.000	0.000	photosystem II protein I [Bertholletia excelsa]
BolSC29t60525H	0.000	0.000	0.000	0.000	0.000	0.000	0.000	0.000	0.000	AtpH [Zantedeschia hybrid cultivar]
BolSC29t60526H	0.000	0.000	0.000	0.000	0.000	0.000	0.000	0.000	0.000	RpoA [Brassica juncea subsp. integrifolia]
BolSC29t60527H	0.000	0.000	0.000	0.000	0.000	0.000	0.000	0.000	0.000	ribosomal protein S11 [Arabidopsis neglecta subsp. neglecta]
BolSC29t60528H	0.000	0.449	0.000	0.803	0.000	0.371	0.000	0.000	0.382	ribosomal protein L36 [Dendrobium pseudotenellum]
BolSC29t60529H	0.000	0.000	0.000	0.000	0.114	0.104	0.000	0.000	0.000	ribosomal protein S8 [Dontostemon micranthus]
BolSC29t60530H	0.114	0.139	0.000	0.000	0.000	0.458	0.000	0.000	0.000	ribosomal protein L14 [Capsella bursa-pastoris]
BolSC29t60531H	0.000	0.000	0.000	0.000	0.000	0.000	0.000	0.000	0.000	ribosomal protein L16 [Farsetia stylosa]
BolSC29t60532H	0.000	0.000	0.000	0.000	0.000	0.000	0.000	0.000	0.000	ribosomal protein S3 [Ionopsidium acaule]
BolSC29t60533H	0.000	0.122	0.000	0.000	0.055	0.455	0.000	0.000	0.000	rpl2 protein [Arabis alpina]
BolSC29t60534H	0.000	0.000	0.000	0.000	0.000	0.000	0.000	0.000	0.000	ribosomal protein L23 [Chaenomeles speciosa]
BolSC29t60535H	0.000	0.000	0.000	0.000	0.000	0.000	0.000	0.000	0.000	ycf2 [Brassica napus]
BolSC29t60536H	0.000	0.000	0.000	0.000	0.000	0.000	0.000	0.000	0.000	hypothetical protein ARALYDRAFT_894061 [Arabidopsis lyrata subsp. lyrata]
BolSC29t60537H	0.000	0.000	0.000	0.000	0.000	0.000	0.000	0.000	0.000	NdhB [Brassica juncea subsp. integrifolia]
BolSC29t60538H	0.000	0.000	0.000	0.000	0.000	0.000	0.000	0.000	0.000	unnamed protein product [Microthlaspi erraticum]
BolSC29t60539H	0.216	0.262	0.000	1.174	1.651	4.988	1.845	2.512	0.892	hypothetical protein E3N88_13121 [Mikania micrantha]
BolSC29t60540H	0.000	0.000	0.000	0.063	0.064	0.058	0.062	0.000	0.060	unnamed protein product [Brassica oleracea]
BolSC29t60541H	0.000	0.000	0.000	0.000	0.000	0.107	0.000	0.000	0.000	hypothetical protein CJ030_MR1G029169 [Morella rubra]
BolSC29t60542H	0.000	0.000	0.000	0.000	0.114	0.000	0.000	0.000	0.000	hypothetical chloroplast RF19 [Farsetia stylosa]
BolSC29t60543H	0.000	0.000	0.000	0.000	0.000	0.000	0.000	0.000	0.000	cytochrome c biogenesis protein [Sisymbrium irio]
BolSC29t60544H	0.000	0.000	0.000	0.000	0.000	0.000	0.000	0.000	0.000	NdhD [Brassica napus var. napus]
BolSC29t60545H	0.000	0.000	0.000	0.000	0.000	0.000	0.000	0.000	0.000	putative photosystem I protein PsaC [Helianthus annuus]
BolSC29t60546H	0.000	0.000	0.000	0.000	0.000	0.000	0.000	0.000	0.000	NADH dehydrogenase ND4L [Draba nemorosa]
BolSC29t60547H	0.000	0.000	0.000	0.000	0.000	0.000	0.000	0.000	0.000	NdhG [Brassica napus var. napus]
BolSC29t60548H	0.000	0.000	0.000	0.000	0.000	0.000	0.000	0.000	0.000	NADH dehydrogenase 18 kDa subunit [Arabis hirsuta]
BolSC29t60549H	0.000	0.000	0.000	0.000	0.000	0.000	0.000	0.000	0.000	NdhA [Brassica juncea subsp. integrifolia]
BolSC29t60550H	0.000	0.000	0.000	0.000	0.000	0.000	0.000	0.000	0.000	NADH-plastoquinone oxidoreductase subunit 7 [Crambe hispanica subsp. abyssinica]
BolSC29t60551H	0.000	0.000	0.000	0.000	0.000	0.000	0.000	0.000	0.000	ribosomal protein S15 [Ionopsidium acaule]
BolSC29t60552H	0.000	0.000	0.000	0.000	0.000	0.000	0.000	0.000	0.000	hypothetical protein Ycf1 [Brassica rapa]
BolSC29t60553H	0.000	0.000	0.000	0.000	0.000	0.000	0.000	0.000	0.000	metallocarboxypeptidase inhibitor [Tanacetum cinerariifolium]
BolSC29t60554H	0.000	0.000	0.069	0.066	0.066	0.061	0.130	0.000	0.000	unnamed protein product [Brassica oleracea]
BolSC29t60555H	0.460	0.280	0.785	1.501	1.256	11.786	8.108	4.016	3.090	cell wall-associated hydrolase, partial [Trifolium pratense]
BolSC29t60556H	0.432	0.262	0.736	1.409	1.179	9.760	4.381	2.931	2.231	hypothetical protein E3N88_13121 [Mikania micrantha]
BolSC29t60557H	0.000	0.063	0.000	0.000	0.000	0.311	0.055	0.000	0.000	unnamed protein product, partial [Brassica oleracea]
BolSC29t60558H	0.000	0.000	0.000	0.000	0.102	0.000	0.000	0.000	0.000	small subunit ribosomal protein S7 [Vigna unguiculata]
BolSC29t60559H	0.000	0.000	0.000	0.098	0.000	0.000	0.000	0.000	0.000	rps7 [Acacia cyclops]
BolSC29t60560H	0.000	0.000	0.000	0.000	0.000	0.000	0.000	0.000	0.000	NADH dehydrogenase subunit 2 [Lawsonia inermis]
BolSC29t60561H	0.000	0.000	0.000	0.000	0.000	0.000	0.000	0.000	0.000	hypothetical protein ARALYDRAFT_894061 [Arabidopsis lyrata subsp. lyrata]
BolSC29t60562H	0.000	0.000	0.000	0.000	0.000	0.000	0.000	0.000	0.000	hypothetical chloroplast RF15 [Plukenetia volubilis]
BolSC29t60563H	0.000	0.000	0.000	0.090	0.000	0.000	0.000	0.000	0.000	ycf2 [Brassica napus]
BolSC29t60564H	0.000	0.000	0.000	0.000	0.000	0.000	0.000	0.000	0.000	ribosomal protein L23 [Chaenomeles speciosa]
BolSC29t60565H	0.000	0.474	0.000	0.000	0.000	0.000	0.000	0.000	0.000	unnamed protein product [Brassica oleracea]
BolSC29t60566H	0.000	0.000	0.091	0.000	0.000	0.201	0.043	0.000	0.000	PsbA [Senna siamea]
BolSC29t60567H	0.000	0.000	0.000	0.000	0.000	1.143	0.405	1.839	0.392	photosystem II protein I [Bertholletia excelsa]
BolSC29t60568H	0.141	0.114	0.000	0.000	0.051	0.236	0.100	0.091	0.000	AtpA [Brassica oleracea var. italica]
BolSC29t60569H	0.285	0.087	0.000	0.000	0.078	0.429	0.152	0.138	0.000	ATPase I subunit [Bunias erucago]
BolSC29t60570H	0.000	0.000	0.000	0.000	0.000	0.000	0.000	0.000	0.000	ATP synthase CF0 subunit III [Ficus racemosa]
BolSC29t60571H	0.000	0.000	0.000	0.000	0.000	0.000	0.000	0.000	0.093	AtpI [Brassica nigra]
BolSC29t60572H	0.000	0.000	0.000	0.000	0.000	0.000	0.000	0.000	0.000	ribosomal protein S2 [Farsetia stylosa]
BolSC29t60573H	0.000	0.105	0.000	0.000	0.000	0.000	0.000	0.000	0.000	RNA polymerase beta'' subunit [Arabis hirsuta var. nipponica]
BolSC29t60574H	0.401	0.000	0.000	0.000	0.000	0.000	0.000	0.000	0.000	photosystem II reaction center protein M [Brassica oleracea var. italica]
BolSC29t60575H	0.000	0.000	0.000	0.000	0.000	0.046	0.000	0.000	0.000	PSII D2 protein [Firmiana major]
BolSC29t60576H	0.000	0.000	0.000	0.000	0.000	0.000	0.000	0.000	0.000	truncated PsbZ [Elaeis guineensis]
BolSC29t60577H	0.000	0.000	0.000	0.000	0.000	0.000	0.000	0.000	0.000	PsaB [Ulmus americana]
BolSC29t60578H	0.020	0.024	0.023	0.087	0.066	0.162	0.021	0.019	0.000	photosystem I P700 chlorophyll a apoprotein A1 [Cochlearia tridactylites]
BolSC29t60579H	0.000	0.000	0.000	0.000	0.000	0.000	0.000	0.000	0.000	photosystem I assembly protein Ycf3 [Eutrema tenue]
BolSC29t60580H	0.000	0.000	0.000	0.000	0.000	0.000	0.000	0.000	0.000	hypothetical chloroplast RF3 [Zabelia integrifolia]
BolSC29t60581H	0.000	0.000	0.000	0.000	0.000	0.000	0.000	0.000	0.000	ribosomal protein S4 [Adenolobus garipensis]
BolSC29t60582H	0.000	0.000	0.000	0.000	0.000	0.000	0.000	0.086	0.000	NADH-plastoquinone oxidoreductase subunit J [Morettia canescens]
BolSC29t60583H	0.000	0.000	0.000	0.000	0.000	0.000	0.000	0.000	0.000	NdhK [Brassica nigra]
BolSC29t60584H	0.000	0.000	0.000	0.000	0.000	0.000	0.000	0.000	0.000	NADH dehydrogenase subunit 3 [Ionopsidium megalospermum]
BolSC29t60585H	0.000	0.000	0.000	0.000	0.000	0.000	0.000	0.000	0.000	AtpB [Brassica juncea subsp. integrifolia]
BolSC29t60586H	0.000	0.000	0.000	0.000	0.000	0.000	0.105	0.000	0.000	ribulose-1,5-bisphosphate carboxylase/oxygenase large subunit, partial [Sinapis arvensis]
BolSC29t60587H	0.000	0.000	0.000	0.000	0.000	0.000	0.000	0.000	0.000	carboxyltransferase beta subunit, partial [Brassica napus]
BolSC29t60588H	0.000	0.000	0.000	0.000	0.000	0.000	0.000	0.000	0.000	photosystem I subunit VIII [Chorispora tenella]
BolSC29t60589H	0.000	0.000	0.000	0.000	0.000	0.000	0.000	0.000	0.000	Ycf4 [Raphanus sativus var. raphanistroides]
BolSC29t60590H	0.000	0.000	0.000	0.000	0.000	0.000	0.000	0.000	0.000	chloroplast envelope membrane protein A [Neotorularia korolkowii]
BolSC29t60591H	0.000	0.000	0.000	0.000	0.000	0.000	0.000	0.000	0.000	cytochrome f [Sinalliaria limprichtiana]
BolSC29t60592H	0.000	0.416	0.000	0.000	0.374	1.032	0.366	0.000	0.000	PsbJ [Heracleum candicans]
BolSC29t60593H	0.000	0.875	0.000	0.000	0.000	1.084	0.384	0.000	0.000	photosystem II protein L [Lespedeza floribunda]
BolSC29t60594H	0.000	0.183	0.000	0.000	0.000	0.000	0.000	0.000	0.000	photosystem II protein V [Cabomba caroliniana]
BolSC29t60595H	0.000	0.000	0.000	0.000	0.000	0.000	0.000	0.000	0.000	PSI J protein [Clausia aprica]
BolSC29t60596H	0.000	0.000	0.000	0.000	0.000	0.000	0.000	0.000	0.000	ribosomal protein L33 [Ricotia cretica]
BolSC29t60597H	0.000	0.000	0.000	0.000	0.000	0.000	0.294	0.000	0.000	ribosomal protein S18 [Lobularia maritima]
BolSC29t60598H	0.357	0.289	0.270	0.000	0.000	0.000	0.127	0.000	0.000	ribosomal protein L20 [Eutrema heterophyllum]
BolSC29t60599H	0.000	0.271	0.000	0.000	0.000	0.000	0.238	0.000	0.000	ribosomal protein S12 [Ranunculus austro-oreganus]
BolSC29t60600H	0.129	0.156	0.000	0.280	0.141	0.129	0.000	0.000	0.000	ClpP [Raphanus sativus var. raphanistroides]
BolSC29t60601H	0.000	0.000	0.000	0.000	0.000	0.000	0.000	0.000	0.000	ClpP [Raphanus sativus var. raphanistroides]
BolSC29t60602H	0.000	0.000	0.000	0.000	0.044	0.163	0.260	0.000	0.126	photosystem II P680 chlorophyll A apoprotein [Arabis hirsuta]
BolSC29t60603H	0.000	0.000	0.000	0.000	0.000	0.000	0.000	0.000	0.000	photosystem II protein N [Paris tetraphylla]
BolSC29t60604H	0.000	0.000	0.000	0.000	0.000	0.000	0.000	0.000	0.000	photosystem II protein H [Arabis hirsuta]
BolSC29t60605H	0.000	0.000	0.074	0.071	0.922	0.653	1.457	0.756	0.000	cytochrome b6 [Tetraena mongolica]
BolSC29t60606H	0.000	0.000	0.000	0.000	0.000	0.000	0.000	0.000	0.000	cytochrome b6/f complex subunit IV [Orychophragmus zhongtiaoshanus]
BolSC29t60607H	0.000	0.000	0.000	0.000	0.057	0.053	0.000	0.000	0.108	RpoA [Brassica juncea subsp. integrifolia]
BolSC29t60608H	0.000	0.000	0.000	0.000	0.000	0.101	0.000	0.000	0.000	ribosomal protein S11 [Arabidopsis neglecta subsp. neglecta]
BolSC29t60609H	0.739	0.000	0.000	0.000	0.000	0.371	0.000	0.000	0.382	ribosomal protein L36 [Dendrobium pseudotenellum]
BolSC29t60610H	0.000	0.000	0.118	0.000	0.000	0.000	0.000	0.000	0.000	ribosomal protein S8 [Dontostemon micranthus]
BolSC29t60611H	0.000	0.000	0.000	0.000	0.000	0.229	0.000	0.000	0.000	ribosomal protein L14 [Capsella bursa-pastoris]
BolSC29t60612H	0.210	0.255	0.000	0.000	0.000	0.000	0.000	0.102	0.108	ribosomal protein L16 [Farsetia stylosa]
BolSC29t60613H	0.000	0.244	0.000	0.000	0.000	0.101	0.107	0.097	0.000	ribosomal protein L22 [Brassica oleracea var. italica]
BolSC29t60614H	0.000	0.000	0.000	0.000	0.000	0.000	0.000	0.000	0.234	ribosomal protein S19 [Orychophragmus taibaiensis]
BolSC29t60615H	0.000	0.000	0.000	0.000	0.000	0.000	0.170	0.077	0.000	ribosomal protein L2 [Brassica carinata]
BolSC29t60616H	0.000	0.000	0.000	0.000	0.000	0.000	0.000	0.000	0.000	ribosomal protein L23 [Chaenomeles speciosa]
BolSC29t60617H	0.000	0.000	0.000	0.000	0.000	0.000	0.000	0.000	0.000	ycf2 [Brassica napus]
BolSC29t60618H	0.000	0.000	0.000	0.000	0.000	0.000	0.000	0.000	0.000	unnamed protein product [Brassica oleracea]
BolSC29t60619H	0.000	0.000	0.000	0.000	0.000	0.000	0.000	0.000	0.000	unnamed protein product, partial [Brassica oleracea]
BolSC29t60620H	0.000	0.133	0.000	0.000	0.000	0.000	0.000	0.000	0.000	Ycf1 [Raphanus sativus]
BolSC29t60621H	0.000	0.000	0.000	0.000	0.000	0.000	0.000	0.000	0.000	NADH-plastoquinone oxidoreductase subunit 4 [Matthiola incana]
BolSC29t60622H	0.000	0.000	0.090	0.000	0.000	0.080	0.000	0.000	0.000	NdhG [Brassica napus var. napus]
BolSC29t60623H	0.000	0.000	0.000	0.000	0.000	0.064	0.000	0.000	0.000	Ycf1 [Brassica oleracea var. italica]
BolSC29t60624H	0.106	0.000	0.000	0.116	0.116	0.748	0.227	0.206	0.000	unnamed protein product [Microthlaspi erraticum]
BolSC29t60625H	0.000	0.000	0.000	0.000	0.000	0.000	0.000	0.000	0.000	unnamed protein product, partial [Brassica oleracea]
BolSC29t60626H	0.000	0.000	0.000	0.000	0.000	0.000	0.000	0.000	0.000	small subunit ribosomal protein S7 [Vigna unguiculata]
BolSC29t60627H	0.000	0.000	0.000	0.000	0.000	0.000	0.000	0.000	0.000	NADH-plastoquinone oxidoreductase subunit 2 [Erysimum cheiranthoides]
BolSC29t60628H	0.000	0.000	0.000	0.000	0.000	0.000	0.000	0.000	0.000	ribosomal protein L16 [Farsetia stylosa]
BolSC29t60629H	0.000	0.000	0.000	0.000	0.000	0.000	0.000	0.000	0.000	ribosomal protein L14 [Capsella bursa-pastoris]
BolSC29t60630H	0.000	0.000	0.000	0.166	0.167	1.686	1.955	0.296	0.000	cytochrome b6/f complex subunit IV [Strelitzia reginae]
BolSC29t60631H	0.000	0.000	0.000	0.000	0.000	0.000	0.000	0.000	0.000	apocytochrome b6 of cytochrome b6/f complex [Cylindrocapsa geminella]
BolSC29t60632H	0.000	0.000	0.000	0.000	0.000	0.000	0.000	0.000	0.000	photosystem II protein N [Fagopyrum dibotrys]
BolSC30t60633H	0.000	0.000	0.000	0.000	0.000	0.000	0.000	0.000	0.000	hypothetical protein F2Q68_00027180 [Brassica cretica]
BolSC33t60634H	36.646	31.961	25.512	22.794	20.048	24.647	34.195	30.463	20.117	hypothetical protein F2Q68_00010313 [Brassica cretica]
BolSC33t60635H	0.000	0.000	0.000	0.000	0.000	0.000	0.000	0.000	0.000	PREDICTED: non-specific lipid-transfer protein-like protein At2g13820 [Brassica oleracea var. oleracea]
BolSC33t60636H	0.000	0.000	0.000	0.000	0.000	0.000	0.000	0.000	0.000	hypothetical protein F2Q70_00002769 [Brassica cretica]
BolSC33t60637H	9.650	8.160	7.340	15.076	15.140	10.897	21.517	25.048	24.284	PREDICTED: uncharacterized protein At4g08330, chloroplastic [Raphanus sativus]
BolSC33t60638H	18.073	19.087	20.689	14.140	16.378	15.922	21.037	22.486	18.179	small glutamine-rich tetratricopeptide repeat-containing protein-like [Brassica napus]
BolSC35t60639H	0.000	0.000	0.000	0.000	0.000	0.000	0.000	0.000	0.000	NADH-plastoquinone oxidoreductase subunit J [Morettia canescens]
BolSC35t60640H	0.000	0.000	0.000	0.000	0.000	0.000	0.000	0.000	0.000	photosystem II G protein [Megacarpaea delavayi]
BolSC35t60641H	0.000	0.000	0.000	0.000	0.000	0.000	0.000	0.000	0.000	NADH-plastoquinone oxidoreductase subunit K [Isatis tinctoria]
BolSC35t60642H	0.000	0.000	0.000	0.000	0.086	0.000	0.000	0.000	0.000	AtpB [Brassica juncea subsp. integrifolia]
BolSC35t60643H	0.029	0.000	0.000	0.000	0.095	0.409	0.124	0.056	0.000	ribulose 1,5-bisphosphate carboxylase/oxygenase large subunit [Crambe hispanica subsp. abyssinica]
BolSC35t60644H	0.100	0.000	0.000	0.055	0.000	0.050	0.054	0.000	0.000	AccD [Brassica juncea subsp. integrifolia]
BolSC35t60645H	0.000	0.000	0.000	0.000	0.000	0.000	0.000	0.000	0.000	photosystem I subunit VIII [Chorispora tenella]
BolSC35t60646H	0.000	0.000	0.000	0.000	0.000	0.000	0.081	0.147	0.000	photosystem I assembly protein Ycf4 [Thlaspi arvense]
BolSC35t60647H	0.000	0.000	0.000	0.000	0.000	0.000	0.000	0.000	0.000	ycf10/cemA [Arabidopsis arenosa subsp. borbasii]
BolSC35t60648H	0.000	0.000	0.000	0.000	0.000	0.000	0.000	0.000	0.000	cytochrome f [Lobularia maritima]
BolSC35t60649H	0.000	0.000	0.000	0.000	0.161	0.000	0.158	0.000	0.000	cytochrome f [Nasturtium officinale]
BolSC35t60650H	0.000	0.000	0.000	0.372	0.374	0.344	0.000	0.332	0.354	PsbJ [Heracleum candicans]
BolSC35t60651H	1.003	1.624	1.519	0.727	0.730	3.692	6.424	2.268	2.762	unnamed protein product [Brassica oleracea]
BolSC35t60652H	1.440	2.186	1.636	1.174	0.786	5.784	8.455	4.536	3.346	PsbF [Eucnide grandiflora]
BolSC35t60653H	0.669	1.015	0.760	0.363	0.182	2.182	3.747	2.106	1.726	cytochrome b559 alpha chain [Dipteronia sinensis]
BolSC35t60654H	0.000	0.000	0.000	0.000	0.000	0.000	0.000	0.000	0.000	cytochrome b6-F complex subunit 5 [Medicago truncatula]
BolSC35t60655H	0.000	0.000	0.371	0.000	0.000	0.000	0.000	0.000	0.000	PSI J protein [Clausia aprica]
BolSC35t60656H	0.000	0.000	0.000	0.000	0.000	0.210	0.000	0.000	0.000	ribosomal protein L33 [Ricotia cretica]
BolSC35t60657H	0.138	0.167	0.156	0.000	0.150	0.276	0.000	0.000	0.000	ribosomal protein S18 [Lobularia maritima]
BolSC35t60658H	0.000	0.000	0.000	0.000	0.000	0.000	0.000	0.000	0.000	ribosomal protein S12 [Ranunculus austro-oreganus]
BolSC35t60659H	0.000	0.469	0.146	0.000	0.141	0.517	0.000	0.125	0.000	ClpP [Raphanus sativus var. raphanistroides]
BolSC35t60660H	0.213	0.000	0.967	0.231	0.232	0.214	0.000	0.206	0.879	ATP-dependent protease subunit [Ricotia cretica]
BolSC35t60661H	0.000	0.000	0.000	0.000	0.000	0.166	0.088	0.000	0.057	photosystem II P680 chlorophyll A apoprotein [Arabis hirsuta]
BolSC35t60662H	0.000	0.000	0.000	0.000	0.451	1.244	0.000	0.000	0.426	photosystem II protein T [Eutrema tenue]
BolSC35t60663H	0.000	0.000	0.000	0.000	0.000	0.320	0.000	0.000	0.000	photosystem II protein N [Paris tetraphylla]
BolSC35t60664H	0.000	0.000	0.000	0.000	0.000	0.000	0.000	0.184	0.196	photosystem II protein H [Arabis hirsuta]
BolSC35t60665H	0.000	0.079	0.000	0.000	0.000	0.065	0.000	0.000	0.000	cytochrome b6 [Tetraena mongolica]
BolSC35t60666H	0.000	0.000	0.000	0.000	0.088	0.161	0.086	0.000	0.000	cytochrome b6/f complex subunit IV [Arabidopsis lyrata]
BolSC35t60667H	0.000	0.000	0.000	0.000	0.000	0.000	0.000	0.000	0.000	RpoA [Brassica juncea subsp. integrifolia]
BolSC35t60668H	0.101	0.123	0.115	0.000	0.110	0.203	0.108	0.000	0.104	ribosomal protein S11 [Arabidopsis neglecta subsp. neglecta]
BolSC35t60669H	1.109	0.449	0.000	0.000	1.210	0.371	1.183	0.358	0.382	ribosomal protein L36 [Dendrobium pseudotenellum]
BolSC35t60670H	0.000	0.000	0.000	0.000	0.000	0.000	0.000	0.231	0.000	ribosomal protein S8 [Aethionema cordifolium]
BolSC35t60671H	0.114	0.000	0.130	0.000	0.125	0.000	0.000	0.111	0.000	ribosomal protein L14 [Capsella bursa-pastoris]
BolSC35t60672H	0.105	0.127	0.119	0.000	0.114	0.105	0.112	0.000	0.000	ribosomal protein L16 [Farsetia stylosa]
BolSC35t60673H	0.000	0.092	0.000	0.000	0.000	0.000	0.000	0.000	0.000	ribosomal protein L22 [Eutrema japonicum]
BolSC35t60674H	0.000	0.000	0.000	0.000	0.000	0.000	0.000	0.000	0.000	ribosomal protein S19 [Orychophragmus taibaiensis]
BolSC35t60675H	0.000	0.000	0.000	0.000	0.000	0.000	0.085	0.000	0.000	ribosomal protein L2 [Brassica carinata]
BolSC35t60676H	0.000	0.000	0.000	0.000	0.000	0.000	0.000	0.000	0.000	ribosomal protein L23 [Chaenomeles speciosa]
BolSC35t60677H	0.000	0.000	0.000	0.000	0.000	0.000	0.000	0.000	0.000	ycf2 [Brassica napus]
BolSC35t60678H	0.076	0.000	0.000	0.000	0.000	0.000	0.000	0.000	0.000	ycf2 [Brassica napus]
BolSC35t60679H	0.000	0.000	0.000	0.000	0.000	0.000	0.000	0.000	0.000	hypothetical protein ARALYDRAFT_894061 [Arabidopsis lyrata subsp. lyrata]
BolSC35t60680H	0.000	0.000	0.000	0.000	0.000	0.000	0.000	0.000	0.000	NAD(P)H-quinone oxidoreductase subunit 2 [Medicago truncatula]
BolSC35t60681H	0.000	0.000	0.000	0.000	0.000	0.000	0.000	0.000	0.000	small subunit ribosomal protein S7 [Vigna unguiculata]
BolSC35t60682H	0.000	0.000	0.000	0.000	0.000	0.000	0.000	0.000	0.000	unnamed protein product, partial [Brassica oleracea]
BolSC35t60683H	0.000	0.000	0.000	0.000	0.000	0.000	0.000	0.000	0.000	hypothetical protein E3N88_13121 [Mikania micrantha]
BolSC35t60684H	0.117	0.212	0.132	0.380	1.208	4.621	2.674	1.299	0.481	unnamed protein product [Brassica oleracea]
BolSC35t60685H	0.000	0.000	0.075	0.000	0.000	0.066	0.000	0.000	0.000	hypothetical protein Ycf1 [Brassica oleracea]
BolSC35t60686H	0.000	0.000	0.029	0.000	0.000	0.025	0.000	0.000	0.000	hypothetical chloroplast RF19 [Brassica oleracea var. italica]
BolSC35t60687H	0.000	0.000	0.000	0.000	0.000	0.000	0.000	0.000	0.000	ribosomal protein S15 [Brassica napus]
BolSC35t60688H	0.000	0.000	0.000	0.000	0.000	0.000	0.000	0.000	0.000	NADH dehydrogenase subunit 7 [Pugionium cornutum]
BolSC35t60689H	0.000	0.000	0.000	0.000	0.000	0.078	0.083	0.000	0.000	NADH-plastoquinone oxidoreductase subunit 1 [Cakile arabica]
BolSC35t60690H	0.084	0.000	0.000	0.000	0.091	0.000	0.000	0.000	0.000	NADH dehydrogenase 18 kDa subunit [Arabis hirsuta]
BolSC35t60691H	0.000	0.000	0.144	0.000	0.000	0.000	0.000	0.000	0.000	NdhG [Brassica napus var. napus]
BolSC35t60692H	0.000	0.000	0.000	0.000	0.000	0.000	0.000	0.000	0.000	NADH dehydrogenase ND4L [Draba nemorosa]
BolSC35t60693H	0.000	0.271	0.000	0.000	0.487	0.000	0.000	0.000	0.000	putative photosystem I protein PsaC [Helianthus annuus]
BolSC35t60694H	0.050	0.000	0.057	0.000	0.000	0.000	0.054	0.000	0.000	NdhD [Brassica napus var. napus]
BolSC35t60695H	0.000	0.000	0.097	0.000	0.000	0.000	0.000	0.000	0.000	cytochrome c biogenesis protein [Sisymbrium irio]
BolSC35t60696H	0.000	0.000	0.000	0.000	0.000	0.000	0.000	0.000	0.000	NdhF [Brassica nigra]
BolSC35t60697H	0.000	0.000	0.000	0.000	0.000	0.000	0.000	0.000	0.000	Ycf1 [Brassica oleracea var. italica]
BolSC35t60698H	0.000	0.000	0.000	0.000	0.000	0.000	0.000	0.000	0.000	Ycf1 [Brassica oleracea var. italica]
BolSC35t60699H	0.000	0.000	0.000	0.000	0.000	0.000	0.000	0.000	0.000	NADH dehydrogenase subunit F, partial [Brassica napus]
BolSC35t60700H	0.000	0.000	0.000	0.000	0.000	0.000	0.000	0.000	0.000	ribosomal protein L32 [Neotorularia korolkowii]
BolSC35t60701H	0.000	0.000	0.000	0.000	0.047	0.000	0.000	0.000	0.000	cytochrome c biogenesis protein [Sisymbrium irio]
BolSC35t60702H	0.000	0.000	0.000	0.000	0.000	0.000	0.000	0.000	0.000	NdhD [Brassica nigra]
BolSC35t60703H	0.000	0.000	0.000	0.000	0.000	0.000	0.000	0.000	0.000	photosystem I subunit VII [Aconitum sinomontanum]
BolSC35t60704H	0.000	0.000	0.000	0.000	0.000	0.000	0.000	0.000	0.000	NADH dehydrogenase ND4L [Draba nemorosa]
BolSC35t60705H	0.000	0.000	0.000	0.000	0.000	0.000	0.000	0.000	0.000	NdhG [Alyssum desertorum]
BolSC35t60706H	0.000	0.000	0.000	0.000	0.000	0.000	0.000	0.000	0.000	NADH dehydrogenase 18 kDa subunit [Arabis hirsuta]
BolSC35t60707H	0.000	0.000	0.000	0.000	0.000	0.000	0.000	0.000	0.000	NADH-plastoquinone oxidoreductase subunit 1 [Cakile arabica]
BolSC35t60708H	0.000	0.000	0.000	0.000	0.047	0.043	0.000	0.000	0.000	NADH dehydrogenase 49KDa protein [Arabidopsis lyrata subsp. petraea]
BolSC35t60709H	0.000	0.000	0.000	0.000	0.000	0.000	0.000	0.000	0.000	ribosomal protein S15 [Brassica napus]
BolSC35t60710H	0.000	0.000	0.000	0.000	0.000	0.000	0.000	0.000	0.000	Ycf1 [Brassica napus var. napus]
BolSC35t60711H	0.000	0.000	0.000	0.000	0.000	0.166	0.176	0.000	0.000	unnamed protein product [Brassica oleracea]
BolSC35t60712H	0.000	0.096	0.000	0.259	0.346	1.274	0.677	0.308	0.328	unnamed protein product [Brassica oleracea]
BolSC35t60713H	0.000	0.000	0.000	0.000	0.000	0.000	0.000	0.000	0.000	hypothetical protein E3N88_13121 [Mikania micrantha]
BolSC35t60714H	0.000	0.000	0.000	0.000	0.000	0.000	0.000	0.000	0.000	unnamed protein product, partial [Brassica oleracea]
BolSC35t60715H	0.000	1.089	0.000	0.325	0.326	3.899	2.232	0.869	0.308	hypothetical protein C5167_003922, partial [Papaver somniferum]
BolSC35t60716H	0.281	0.171	0.000	0.000	0.000	0.000	0.000	0.272	0.000	ribosomal protein S12 [Calotropis procera]
BolSC35t60717H	0.000	0.000	0.205	0.098	0.000	0.181	0.000	0.000	0.093	rps7 [Acacia cyclops]
BolSC35t60718H	0.000	0.000	0.044	0.042	0.000	0.000	0.000	0.000	0.000	NADH-plastoquinone oxidoreductase subunit 2 [Plukenetia volubilis]
BolSC35t60719H	0.000	0.000	0.000	0.000	0.000	0.000	0.000	0.000	0.000	hypothetical protein ARALYDRAFT_894061 [Arabidopsis lyrata subsp. lyrata]
BolSC35t60720H	0.000	0.000	0.000	0.000	0.000	0.235	0.000	0.000	0.000	Ycf2 [Tarenaya hassleriana]
BolSC35t60721H	0.000	0.000	0.000	0.000	0.000	0.000	0.000	0.000	0.000	ycf2 [Brassica napus]
BolSC35t60722H	0.000	0.000	0.000	0.000	0.000	0.000	0.000	0.000	0.000	ycf2 [Brassica napus]
BolSC35t60723H	0.000	0.000	0.000	0.000	0.000	0.000	0.000	0.000	0.000	Ycf2 [Brassica nigra]
BolSC35t60724H	0.000	0.000	0.000	0.000	0.000	0.000	0.000	0.000	0.000	unnamed protein product, partial [Brassica rapa]
BolSC35t60725H	0.000	0.064	0.060	0.114	0.057	0.106	0.112	0.051	0.000	50S ribosomal protein L2, chloroplastic [Triticum urartu]
BolSC35t60726H	0.128	0.078	0.000	0.000	0.000	0.000	0.000	0.000	0.000	ribosomal protein S3 [Ionopsidium acaule]
BolSC35t60727H	0.000	0.000	0.195	0.000	0.000	0.344	0.183	0.166	0.000	ribosomal protein L16 [Raphanus sativus var. raphanistroides]
BolSC35t60728H	0.114	0.000	0.000	0.000	0.374	0.344	0.244	0.000	0.000	ribosomal protein L14 [Capsella bursa-pastoris]
BolSC35t60729H	0.312	0.379	0.118	0.113	0.227	0.731	0.111	0.101	0.107	ribosomal protein S8 [Dontostemon micranthus]
BolSC35t60730H	0.370	0.000	0.000	0.000	0.000	0.742	0.000	0.000	0.763	ribosomal protein L36 [Dendrobium pseudotenellum]
BolSC35t60731H	0.202	0.245	0.000	0.000	0.000	0.000	0.108	0.000	0.104	ribosomal protein S11 [Arabidopsis neglecta subsp. neglecta]
BolSC35t60732H	0.000	0.000	0.000	0.000	0.000	0.000	0.000	0.000	0.000	RpoA [Brassica juncea subsp. integrifolia]
BolSC35t60733H	0.000	0.000	0.000	0.000	0.000	0.095	0.000	0.000	0.000	cytochrome b6/f complex subunit IV [Arabidopsis lyrata]
BolSC35t60734H	0.000	0.000	0.000	0.000	0.000	0.000	0.000	0.000	0.000	PetB [Dendrosenecio battiscombei]
BolSC35t60735H	0.000	0.000	0.000	0.000	0.621	0.000	0.203	0.000	0.000	photosystem II protein H [Arabis hirsuta]
BolSC35t60736H	0.000	0.000	0.000	0.347	0.348	0.961	0.341	0.000	0.000	photosystem II protein N [Paris tetraphylla]
BolSC35t60737H	0.000	0.000	0.000	0.449	0.902	1.659	0.441	0.000	0.000	photosystem II protein T [Eutrema tenue]
BolSC35t60738H	0.028	0.034	0.000	0.030	0.091	0.391	0.208	0.054	0.000	PsbB [Raphanus sativus var. raphanistroides]
BolSC35t60739H	0.426	0.258	0.483	0.231	0.232	0.214	1.363	0.619	0.659	ATP-dependent protease subunit [Ricotia cretica]
BolSC35t60740H	0.213	0.000	0.242	0.000	0.232	0.000	0.000	0.000	0.000	ribosomal protein S12 [Carthamus tinctorius]
BolSC35t60741H	0.000	0.000	0.238	0.000	0.000	0.210	0.224	0.000	0.000	ribosomal protein L33 [Ricotia cretica]
BolSC35t60742H	0.000	0.000	0.000	0.000	0.000	0.000	0.000	0.000	0.000	PSI J protein [Clausia aprica]
BolSC35t60743H	0.000	0.000	0.000	0.000	0.000	0.000	0.000	0.000	0.000	cytochrome b6-F complex subunit 5 [Medicago truncatula]
BolSC35t60744H	0.000	0.000	0.000	0.000	0.000	0.000	0.000	0.000	0.000	PsbE [Prunus armeniaca]
BolSC35t60745H	0.000	0.000	0.000	0.000	0.383	0.352	0.749	1.361	0.362	photosystem II cytochrome b559 beta chain [Solenopsis bivonae]
BolSC35t60746H	0.000	0.000	0.000	0.000	0.393	0.361	0.769	1.396	0.372	photosystem II protein L [Lespedeza floribunda]
BolSC35t60747H	0.000	0.000	0.000	0.000	0.000	0.000	0.000	0.000	0.000	PsbJ [Heracleum candicans]
BolSC35t60748H	0.000	0.000	0.000	0.000	0.000	0.000	0.000	0.000	0.000	cytochrome f [Lunaria rediviva]
BolSC35t60749H	0.000	0.000	0.000	0.000	0.000	0.000	0.000	0.000	0.000	chloroplast envelope membrane protein A [Neotorularia korolkowii]
BolSC35t60750H	0.000	0.000	0.000	0.000	0.000	0.076	0.081	0.000	0.078	photosystem I assembly protein Ycf4 [Thlaspi arvense]
BolSC35t60751H	0.000	0.000	0.000	0.000	0.000	0.371	0.000	0.000	0.000	photosystem I subunit VIII [Chorispora tenella]
BolSC35t60752H	0.050	0.061	0.057	0.000	0.055	0.050	0.054	0.000	0.000	AccD [Brassica juncea subsp. integrifolia]
BolSC35t60753H	0.000	0.000	0.000	0.132	0.066	0.122	0.260	0.059	0.000	ribulose-1,5-bisphosphate carboxylase/oxygenase large subunit, partial [Ranalisma rostratum]
BolSC35t60754H	0.000	0.000	0.363	0.347	0.348	0.320	0.341	0.000	0.000	unnamed protein product [Brassica oleracea]
BolSC35t60755H	0.000	0.000	0.000	0.103	0.104	0.191	0.203	0.092	0.000	AtpB [Brassica juncea subsp. integrifolia]
BolSC35t60756H	0.000	0.000	0.000	0.000	0.115	0.424	0.225	0.000	0.109	ATPase epsilon subunit [Lepidium virginicum]
BolSC35t60757H	0.000	0.000	0.000	0.000	0.000	0.000	0.000	0.000	0.000	NADH dehydrogenase subunit J, partial [Muraltia aspalatha]
BolSC37t60758H	0.072	0.000	0.000	0.000	0.157	0.289	0.077	0.000	0.000	ATP synthase CF1 alpha subunit [Sinapis alba]
BolSC37t60759H	0.000	0.000	0.000	0.000	0.000	0.000	0.254	0.000	0.246	unnamed protein product [Brassica rapa]
BolSC37t60760H	0.000	0.000	0.000	0.000	0.000	0.000	0.000	0.000	0.000	RNA polymerase beta subunit [Agave attenuata]
BolSC37t60761H	0.000	0.000	0.000	0.000	0.000	0.000	0.000	0.000	0.000	photosystem I P700 apoprotein A1 [Sagittaria trifolia]
BolSC37t60762H	0.000	0.000	0.000	0.093	0.031	0.114	0.030	0.000	0.000	PSI P700 apoprotein A2 [Bunias orientalis]
BolSC37t60763H	0.000	0.000	0.000	0.000	0.000	0.090	0.000	0.000	0.000	photosystem II CP43 chlorophyll apoprotein [Arabidopsis lyrata subsp. petraea]
BolSC37t60764H	0.000	0.164	0.077	0.000	0.000	0.000	0.000	0.000	0.000	RNA polymerase beta subunit [Brassica rapa]
BolSC37t60765H	0.111	0.067	0.000	0.060	0.061	0.056	0.000	0.000	0.000	RNA polymerase beta subunit [Brassica rapa]
BolSC37t60766H	0.029	0.070	0.065	0.000	0.000	0.058	0.000	0.000	0.000	RpoC1 [Alyssum desertorum]
BolSC37t60767H	0.000	0.182	0.000	0.082	0.000	0.075	0.080	0.000	0.000	RpoC1 [Raphanus sativus var. sativus]
BolSC37t60768H	0.000	0.000	0.000	0.104	0.000	0.000	0.000	0.000	0.000	RNA polymerase beta'' subunit [Arabis hirsuta var. nipponica]
BolSC37t60769H	0.119	0.144	0.000	0.129	0.000	0.000	0.000	0.287	0.000	ribosomal protein S2 [Ionopsidium abulense]
BolSC37t60770H	0.112	0.341	0.000	0.061	0.000	0.113	0.240	0.054	0.000	AtpI [Brassica nigra]
BolSC37t60771H	0.000	0.000	0.000	0.000	0.000	0.000	0.153	0.000	0.148	ATP synthase CF0 subunit III [Ficus racemosa]
BolSC37t60772H	0.072	0.175	0.164	0.000	0.000	0.072	0.077	0.000	0.000	ATPase I subunit [Bunias erucago]
BolSC37t60773H	0.000	0.000	0.000	0.000	0.000	0.000	0.000	0.000	0.000	ATP synthase CF1 alpha subunit [Sinapis alba]
BolSC37t60774H	0.000	0.000	0.000	0.000	0.000	0.000	0.000	0.000	0.000	photosystem II protein I [Bertholletia excelsa]
BolSC37t60775H	0.000	0.000	0.000	0.000	0.000	0.000	0.000	0.000	0.000	photosystem II protein K [Orychophragmus taibaiensis]
BolSC37t60776H	0.160	0.194	0.363	0.000	0.174	0.481	0.000	0.000	0.000	ribosomal protein S16 [Raphanus sativus var. raphanistroides]
BolSC37t60777H	0.000	0.000	0.000	0.000	0.000	0.000	0.000	0.000	0.000	maturase K [Brassica napus]
BolSC37t60778H	0.000	0.100	0.000	0.090	0.000	0.083	0.000	0.000	0.000	photosystem II protein D1 [Ulmus macrocarpa]
BolSC37t60779H	0.000	0.000	0.000	0.000	0.000	0.000	0.000	0.000	0.000	ribosomal protein L2 [Ricotia lunaria]
BolSC37t60780H	0.000	0.000	0.000	0.000	0.000	0.000	0.000	0.000	0.000	ribosomal protein L23 [Chaenomeles speciosa]
BolSC37t60781H	0.000	0.000	0.000	0.000	0.000	0.000	0.000	0.000	0.000	putative ATPase, AAA-type, core, P-loop containing nucleoside triphosphate hydrolase [Rosa chinensis]
BolSC37t60782H	0.000	0.000	0.000	0.000	0.000	0.000	0.000	0.000	0.000	ycf2 [Brassica napus]
BolSC37t60783H	0.000	0.000	0.000	0.000	0.000	0.000	0.000	0.000	0.000	ORF77 [Isatis tinctoria]
BolSC37t60784H	0.000	0.000	0.000	0.000	0.072	0.000	0.000	0.064	0.000	NADH-plastoquinone oxidoreductase subunit 2 [Erysimum cheiranthoides]
BolSC37t60785H	0.000	0.109	0.102	0.000	0.000	0.000	0.000	0.087	0.000	rps7 [Acacia cyclops]
BolSC37t60786H	0.000	0.000	0.000	0.000	0.000	0.000	0.000	0.000	0.000	small subunit ribosomal protein S7 [Vigna unguiculata]
BolSC37t60787H	0.000	0.000	0.000	0.000	0.000	0.106	0.000	0.000	0.000	hypothetical protein CJ030_MR1G029169 [Morella rubra]
BolSC37t60788H	0.000	0.000	0.000	0.000	0.000	0.000	0.000	0.000	0.000	Ycf1 [Raphanus sativus]
BolSC37t60789H	0.000	0.000	0.000	0.000	0.024	0.000	0.024	0.000	0.000	NADH dehydrogenase subunit 5 [Raphanus sativus]
BolSC37t60790H	0.000	0.000	0.000	0.000	0.000	0.057	0.000	0.000	0.000	CcsA [Brassica oleracea var. italica]
BolSC37t60791H	0.000	0.000	0.032	0.000	0.092	0.028	0.000	0.027	0.000	NdhD [Raphanus sativus var. sativus]
BolSC37t60792H	0.000	0.000	0.000	0.000	0.000	0.000	0.000	0.000	0.000	photosystem I subunit VII [Aconitum sinomontanum]
BolSC37t60793H	0.000	0.000	0.000	0.000	0.000	0.000	0.000	0.133	0.000	NADH dehydrogenase ND4L [Draba nemorosa]
BolSC37t60794H	0.000	0.000	0.000	0.000	0.000	0.000	0.085	0.000	0.000	NdhG [Brassica napus var. napus]
BolSC37t60795H	0.000	0.000	0.000	0.000	0.000	0.000	0.000	0.000	0.000	NADH dehydrogenase 18 kDa subunit [Arabis hirsuta]
BolSC37t60796H	0.000	0.000	0.000	0.000	0.178	0.000	0.000	0.000	0.000	NADH-plastoquinone oxidoreductase subunit 1 [Arabidopsis lyrata subsp. lyrata]
BolSC37t60797H	0.000	0.000	0.000	0.000	0.000	0.000	0.000	0.000	0.000	NADH dehydrogenase subunit 7 [Capsella rubella]
BolSC37t60798H	0.158	0.000	0.000	0.000	0.000	0.000	0.000	0.000	0.000	ribosomal protein S15 [Brassica napus]
BolSC37t60799H	0.054	0.066	0.000	0.000	0.000	0.000	0.000	0.000	0.000	hypothetical chloroplast RF19 [Brassica oleracea var. italica]
BolSC37t60800H	0.000	0.000	0.000	0.000	0.000	0.000	0.000	0.000	0.000	ycf1 [Arabidopsis arenosa]
BolSC37t60801H	0.000	0.000	0.000	0.449	0.000	1.244	0.441	1.201	0.426	hypothetical protein ES332_A05G359600v1 [Gossypium tomentosum]
BolSC37t60802H	0.000	0.000	0.000	0.000	0.000	0.000	0.000	0.000	0.000	NADH dehydrogenase 18 kDa subunit [Arabis hirsuta]
BolSC37t60803H	0.000	0.000	0.000	0.000	0.000	0.000	0.000	0.000	0.000	unnamed protein product [Brassica oleracea]
BolSC39t60804H	0.000	0.000	0.000	0.000	0.000	0.000	0.000	0.000	0.000	unnamed protein product, partial [Brassica oleracea]
BolSC39t60805H	0.000	0.000	0.000	0.000	0.000	0.000	0.000	0.000	0.000	_
BolSC43t60806H	0.000	0.000	0.000	0.000	0.000	0.000	0.000	0.000	0.000	NADH dehydrogenase subunit F, partial [Boechera laevigata]
BolSC43t60807H	0.000	0.000	0.000	0.000	0.000	0.000	0.000	0.000	0.000	unnamed protein product [Brassica oleracea]
BolSC43t60808H	0.000	0.000	0.000	0.000	0.000	0.000	0.000	0.000	0.000	unnamed protein product [Brassica oleracea]
BolSC43t60809H	0.000	0.000	0.000	0.000	0.000	0.000	0.000	0.000	0.000	ycf1 [Arabidopsis arenosa]
BolSC43t60810H	0.000	0.000	0.000	0.000	0.000	0.000	0.000	0.000	0.000	NADH-plastoquinone oxidoreductase subunit 1 [Erodium foetidum subsp. foetidum]
BolSC43t60811H	0.000	0.000	0.000	0.000	0.000	0.000	0.000	0.000	0.000	Metallocarboxypeptidase inhibitor [Dorcoceras hygrometricum]
BolSC44t60812H	0.000	0.000	0.000	0.000	0.180	0.332	0.353	0.480	0.000	putative protein ycf68, partial [Mucuna pruriens]
BolSC44t60813H	0.000	0.000	0.000	0.110	0.110	0.710	0.108	0.000	0.000	unnamed protein product, partial [Brassica oleracea]
BolSC44t60814H	0.000	0.525	0.245	1.644	1.415	4.771	2.075	2.303	0.669	hypothetical protein E3N88_13121 [Mikania micrantha]
BolSC44t60815H	0.000	0.000	0.000	0.000	0.123	0.226	0.120	2.069	0.000	unnamed protein product [Brassica oleracea]
BolSC44t60816H	0.000	0.000	0.000	0.000	0.000	0.107	0.000	0.000	0.000	hypothetical protein CJ030_MR1G029169 [Morella rubra]
BolSC44t60817H	0.000	0.000	0.000	0.000	0.000	0.057	0.000	0.000	0.000	Ycf1 [Brassica oleracea var. italica]
BolSC44t60818H	0.000	0.000	0.000	0.000	0.000	0.019	0.000	0.000	0.000	NADH dehydrogenase subunit 5 [Sisymbrium irio]
BolSC44t60819H	0.000	0.322	0.000	0.288	0.289	0.798	1.980	0.257	0.547	ribosomal protein L32 [Neotorularia korolkowii]
BolSC44t60820H	0.000	0.000	0.086	0.000	0.000	0.000	0.000	0.000	0.000	NdhD [Brassica napus var. napus]
BolSC44t60821H	0.000	0.000	0.000	0.000	0.000	0.000	0.000	0.000	0.000	putative photosystem I protein PsaC [Helianthus annuus]
BolSC44t60822H	0.000	0.167	0.000	0.000	0.000	0.000	0.147	0.000	0.000	NADH dehydrogenase ND4L [Draba nemorosa]
BolSC44t60823H	0.000	0.000	0.000	0.000	0.000	0.000	0.000	0.000	0.000	unnamed protein product [Brassica oleracea]
BolSC44t60824H	0.000	0.000	0.000	0.000	0.000	0.000	0.000	0.000	0.000	NADH dehydrogenase 18 kDa subunit [Arabis hirsuta]
BolSC44t60825H	0.040	0.000	0.000	0.000	0.000	0.080	0.000	0.000	0.000	NADH-plastoquinone oxidoreductase subunit 1 [Cakile arabica]
BolSC44t60826H	0.000	0.000	0.000	0.000	0.000	0.000	0.000	0.000	0.000	NADH-plastoquinone oxidoreductase subunit 7 [Crambe hispanica subsp. abyssinica]
BolSC44t60827H	0.000	0.000	0.000	0.000	0.000	0.000	0.000	0.000	0.000	ribosomal protein S15 [Schrenkiella parvula]
BolSC44t60828H	0.049	0.000	0.000	0.000	0.000	0.000	0.000	0.000	0.000	Ycf1 [Brassica oleracea var. italica]
BolSC44t60829H	0.000	0.129	0.000	0.000	0.000	0.214	0.000	0.000	0.000	hypothetical protein CJ030_MR1G029169 [Morella rubra]
BolSC44t60830H	0.000	0.074	0.000	0.200	0.067	1.108	0.720	0.297	0.000	hypothetical protein D5086_0000138580 [Populus alba]
BolSC44t60831H	0.000	0.000	0.000	0.000	0.487	1.343	0.238	0.000	0.000	hypothetical protein E3N88_13121 [Mikania micrantha]
BolSC44t60832H	0.000	0.000	0.000	0.000	0.000	0.000	0.000	0.000	0.000	unnamed protein product, partial [Brassica oleracea]
BolSC44t60833H	0.000	0.000	0.000	0.000	0.000	0.000	0.000	0.000	0.000	Ycf68 [Boswellia sacra]
BolSC44t60834H	0.089	0.108	0.000	0.000	0.000	0.000	0.000	0.000	0.092	ribosomal protein S7 [Tetrastigma yunnanense]
BolSC44t60835H	0.000	0.000	0.000	0.000	0.000	0.000	0.000	0.000	0.000	NADH-plastoquinone oxidoreductase subunit 2 chloroplast [Cinnamomum micranthum f. kanehirae]
BolSC44t60836H	0.000	0.000	0.000	0.000	0.000	0.000	0.000	0.000	0.000	PREDICTED: uncharacterized protein LOC108485142 [Gossypium arboreum]
BolSC44t60837H	0.000	0.000	0.000	0.000	0.000	0.000	0.000	0.000	0.000	ORF77 [Isatis tinctoria]
BolSC44t60838H	0.000	0.000	0.000	0.000	0.000	0.000	0.000	0.000	0.000	ycf2 [Brassica napus]
BolSC44t60839H	0.000	0.000	0.000	0.000	0.000	0.000	0.000	0.000	0.000	Ycf2 [Brassica juncea subsp. integrifolia]
BolSC44t60840H	0.000	0.000	0.000	0.000	0.000	0.000	0.000	0.000	0.000	ribosomal protein L23 [Chaenomeles speciosa]
BolSC44t60841H	0.000	0.091	0.085	0.000	0.000	0.150	0.000	0.072	0.000	ribosomal protein L2 [Nitraria sibirica]
BolSC44t60842H	4.544	1.505	2.815	2.245	3.607	6.219	3.527	1.601	0.853	unnamed protein product [Brassica oleracea]
BolSC44t60843H	0.000	0.000	0.000	0.000	0.000	0.178	0.000	0.000	0.000	ribosomal protein S16 [Farsetia stylosa]
BolSC44t60844H	0.000	0.000	0.000	0.000	0.000	0.000	0.000	0.000	0.000	ATP synthase CF0 B subunit [Arabidopsis lyrata subsp. lyrata]
BolSC44t60845H	0.000	0.000	0.000	0.000	0.000	0.000	0.000	0.000	0.000	ATP synthase CF0 subunit III [Ficus racemosa]
BolSC44t60846H	0.000	0.000	0.000	0.000	0.000	0.000	0.000	0.000	0.000	Ribosomal protein S2 [Corchorus capsularis]
BolSC44t60847H	0.000	0.000	0.000	0.000	0.000	0.000	0.000	0.000	0.000	RpoC2 [Raphanus sativus var. raphanistroides]
BolSC44t60848H	0.000	0.000	0.000	0.000	0.000	0.000	0.070	0.000	0.000	DNA-directed RNA polymerase subunit beta' [Brassica oleracea var. italica]
BolSC44t60849H	0.000	0.037	0.000	0.000	0.000	0.000	0.000	0.000	0.000	RNA polymerase beta subunit [Brassica rapa]
BolSC44t60850H	0.000	0.000	0.000	0.000	0.000	0.000	0.000	0.000	0.000	RNA polymerase beta subunit [Brassica rapa]
BolSC44t60851H	0.000	0.000	0.000	0.000	0.000	0.000	0.000	0.000	0.000	photosystem II reaction center protein M [Brassica oleracea var. italica]
BolSC44t60852H	0.000	0.047	0.000	0.000	0.000	0.000	0.083	0.038	0.000	PSII D2 protein [Firmiana major]
BolSC44t60853H	0.000	0.000	0.000	0.000	0.260	0.000	0.000	0.000	0.000	photosystem II protein Z [Santalum boninense]
BolSC44t60854H	0.000	0.000	0.000	0.000	0.000	0.000	0.000	0.000	0.000	Photosystem I P700 chlorophyll a apoprotein A2 [Artemisia annua]
BolSC44t60855H	0.000	0.000	0.000	0.000	0.000	0.088	0.000	0.000	0.000	photosystem I P700 chlorophyll a apoprotein A2 [Cochlearia scotica]
BolSC44t60856H	0.000	0.000	0.000	0.000	0.089	0.082	0.087	0.000	0.000	PsaB [Brassica nigra]
BolSC44t60857H	0.000	0.000	0.000	0.000	0.000	0.000	0.000	0.000	0.000	photosystem I P700 chlorophyll a apoprotein A1 [Cochlearia tridactylites]
BolSC44t60858H	0.000	0.000	0.000	0.000	0.000	0.000	0.000	0.000	0.000	unnamed protein product, partial [Brassica oleracea]
BolSC44t60859H	0.000	0.000	0.000	0.000	0.000	0.000	0.000	0.000	0.000	LOW QUALITY PROTEIN: uncharacterized protein LOC112087821 [Eutrema salsugineum]
BolSC44t60860H	0.000	0.000	0.000	0.000	0.000	0.000	0.000	0.000	0.000	ribosomal protein S4 [Citrus sinensis]
BolSC45t60861H	0.000	0.000	0.000	0.000	0.000	0.000	0.000	0.000	0.000	ribulose-1,5-bisphosphate carboxylase/oxygenase large subunit, partial [Convolvulus kotschyanus]
BolSC45t60862H	0.000	0.000	0.000	0.000	0.000	0.000	0.000	0.000	0.000	AtpB [Brassica juncea subsp. integrifolia]
BolSC45t60863H	0.000	0.000	0.000	0.000	0.000	0.000	0.000	0.000	0.000	NdhC [Brassica juncea subsp. integrifolia]
BolSC45t60864H	0.000	0.000	0.000	0.000	0.000	0.000	0.000	0.000	0.000	NADH-plastoquinone oxidoreductase subunit K [Isatis tinctoria]
BolSC45t60865H	0.000	0.000	0.000	0.000	0.000	0.000	0.000	0.000	0.000	NADH-plastoquinone oxidoreductase subunit J [Morettia canescens]
BolSC45t60866H	0.000	0.084	0.000	0.000	0.000	0.000	0.000	0.000	0.000	ribosomal protein S4 [Sinalliaria limprichtiana]
BolSC45t60867H	0.104	0.126	0.118	0.000	0.000	0.104	0.222	0.000	0.000	photosystem I assembly protein Ycf3 [Eutrema halophilum]
BolSC45t60868H	0.000	0.258	0.000	0.231	0.116	0.641	0.454	0.103	0.000	photosystem I P700 apoprotein A1 [Ludwigia octovalvis]
BolSC45t60869H	0.000	0.000	0.000	0.069	0.069	0.254	0.068	0.000	0.000	photosystem I P700 apoprotein A1 [Crambe hispanica subsp. abyssinica]
BolSC45t60870H	0.000	0.000	0.000	0.072	0.072	0.397	0.352	0.000	0.000	PsaB [Brassica nigra]
BolSC45t60871H	0.000	0.000	0.000	0.000	0.000	0.000	0.000	0.000	0.000	photosystem II protein Z [Santalum boninense]
BolSC45t60872H	0.022	0.000	0.000	0.048	0.072	0.243	0.141	0.085	0.000	PREDICTED: LOW QUALITY PROTEIN: photosystem II CP43 reaction center protein-like [Prunus mume]
BolSC45t60873H	0.000	0.000	0.000	0.000	0.000	0.000	0.000	0.000	0.000	RNA polymerase beta subunit [Brassica rapa]
BolSC45t60874H	0.034	0.041	0.000	0.000	0.000	0.034	0.000	0.033	0.000	RNA polymerase beta subunit [Brassica rapa]
BolSC45t60875H	0.000	0.124	0.023	0.000	0.000	0.021	0.000	0.000	0.000	RpoC1 [Brassica napus var. napus]
BolSC45t60876H	0.000	0.000	0.000	0.000	0.000	0.000	0.000	0.000	0.000	RNA polymerase beta'' subunit [Arabis hirsuta var. nipponica]
BolSC45t60877H	0.000	0.000	0.000	0.000	0.000	0.000	0.000	0.000	0.000	ribosomal protein S2 [Bunias orientalis]
BolSC45t60878H	0.112	0.136	0.510	0.061	0.061	0.000	0.060	0.000	0.348	AtpI [Brassica nigra]
BolSC45t60879H	0.143	0.174	0.000	0.311	0.156	0.863	0.306	0.139	0.000	ATP synthase CF0 subunit III [Ficus racemosa]
BolSC45t60880H	0.149	0.181	0.085	0.000	0.000	0.075	0.080	0.145	0.000	AtpF [Raphanus sativus var. raphanistroides]
BolSC45t60881H	0.139	0.112	0.052	0.000	0.000	0.093	0.000	0.134	0.048	AtpA [Brassica oleracea var. italica]
BolSC45t60882H	0.000	0.000	0.000	0.000	0.000	0.000	0.000	0.000	0.392	photosystem II protein I [Bertholletia excelsa]
BolSC45t60883H	0.000	0.000	0.000	0.000	0.000	0.227	0.000	0.000	0.000	photosystem II protein K [Orychophragmus taibaiensis]
BolSC45t60884H	0.000	0.000	0.000	0.000	0.000	0.000	0.000	0.000	0.000	ribosomal protein S16 [Farsetia stylosa]
BolSC45t60885H	0.066	0.160	0.075	0.000	0.072	0.199	0.000	0.000	0.000	maturase K [Brassica napus]
BolSC45t60886H	0.000	0.000	0.000	0.000	0.000	0.000	0.000	0.000	0.000	PsbA [Senna siamea]
BolSC45t60887H	0.070	0.169	0.000	0.227	0.000	0.209	0.000	0.000	0.000	ribosomal protein L2 [Brassica carinata]
BolSC45t60888H	0.413	1.505	0.000	1.347	0.000	1.659	0.000	0.000	0.426	unnamed protein product [Brassica oleracea]
BolSC45t60889H	0.000	0.000	0.000	0.000	0.000	0.000	0.000	0.000	0.000	ribosomal protein L23 [Chaenomeles speciosa]
BolSC45t60890H	0.000	0.187	0.000	0.000	0.084	0.077	0.000	0.075	0.239	ycf2 [Brassica napus]
BolSC45t60891H	0.000	0.000	0.000	0.000	0.000	0.000	0.000	0.000	0.000	Ycf2 [Brassica juncea subsp. integrifolia]
BolSC45t60892H	0.000	0.000	0.000	0.000	0.000	0.000	0.000	0.000	0.000	ycf2 [Brassica napus]
BolSC45t60893H	0.000	0.000	0.000	0.000	0.000	0.000	0.000	0.000	0.000	ORF77 [Isatis tinctoria]
BolSC45t60894H	0.000	0.000	0.000	0.000	0.000	0.000	0.000	0.000	0.000	unnamed protein product [Brassica oleracea]
BolSC45t60895H	0.000	0.076	0.000	0.000	0.000	0.000	0.000	0.000	0.000	NADH-plastoquinone oxidoreductase subunit 2 [Plukenetia volubilis]
BolSC45t60896H	0.000	0.000	0.000	0.000	0.000	0.000	0.000	0.000	0.000	NADH-plastoquinone oxidoreductase subunit 2 [Cardamine oligosperma]
BolSC45t60897H	0.000	0.000	0.000	0.000	0.000	0.000	0.000	0.000	0.000	ribosomal protein S7 [Oreocharis mileensis]
BolSC45t60898H	0.000	0.000	0.000	0.000	0.000	0.000	0.000	0.000	0.000	small subunit ribosomal protein S7 [Vigna unguiculata]
BolSC45t60899H	0.000	0.305	0.000	0.954	0.684	4.280	0.401	0.365	0.000	hypothetical chloroplast RF68 [Festuca arundinacea]
BolSC45t60900H	0.000	0.000	0.000	0.000	0.000	0.000	0.000	0.000	0.000	hypothetical protein E3N88_13121 [Mikania micrantha]
BolSC45t60901H	0.000	0.000	0.000	0.000	0.000	0.000	0.000	0.000	0.000	unnamed protein product [Brassica oleracea]
BolSC45t60902H	0.000	0.079	0.000	0.000	0.000	0.000	0.000	0.000	0.000	Ycf1 [Brassica oleracea var. italica]
BolSC45t60903H	0.040	0.033	0.061	0.029	0.015	0.135	0.057	0.078	0.042	Ycf1 [Brassica rapa subsp. pekinensis]
BolSC45t60904H	0.000	0.000	0.000	0.000	0.000	0.415	0.000	0.000	0.000	ribosomal protein S15 [Schrenkiella parvula]
BolSC45t60905H	0.000	0.000	0.000	0.000	0.000	0.000	0.000	0.000	0.000	NADH dehydrogenase subunit 7 [Capsella rubella]
BolSC45t60906H	0.000	0.000	0.000	0.000	0.000	0.000	0.000	0.000	0.000	NADH-plastoquinone oxidoreductase subunit 1 [Cakile arabica]
BolSC45t60907H	0.000	0.000	0.000	0.000	0.000	0.000	0.093	0.000	0.000	NADH dehydrogenase 18 kDa subunit [Arabis hirsuta]
BolSC45t60908H	0.000	0.000	0.000	0.000	0.000	0.000	0.000	0.000	0.000	NdhG [Brassica napus var. napus]
BolSC45t60909H	0.000	0.000	0.000	0.000	0.000	0.000	0.000	0.000	0.000	NADH dehydrogenase ND4L [Draba nemorosa]
BolSC45t60910H	0.171	0.000	0.000	0.000	0.000	0.000	0.000	0.166	0.000	photosystem I subunit VII [Lophiocarpus polystachyus]
BolSC45t60911H	0.000	0.000	0.000	0.000	0.000	0.000	0.000	0.000	0.000	NdhD [Raphanus sativus var. sativus]
BolSC45t60912H	0.000	0.000	0.000	0.000	0.000	0.000	0.000	0.000	0.000	CcsA [Brassica oleracea var. italica]
BolSC45t60913H	0.000	0.000	0.000	0.000	0.000	0.486	0.000	0.235	0.000	ribosomal protein L32 [Ionopsidium acaule]
BolSC45t60914H	0.000	0.000	0.028	0.000	0.027	0.000	0.000	0.024	0.000	NADH dehydrogenase subunit 5 [Raphanus sativus]
BolSC45t60915H	0.000	0.000	0.000	0.000	0.000	0.000	0.000	0.000	0.000	Ycf1 [Brassica oleracea var. italica]
BolSC45t60916H	0.000	0.000	0.000	0.000	0.000	0.441	0.117	0.000	0.000	hypothetical protein CJ030_MR1G029169 [Morella rubra]
BolSC45t60917H	0.061	0.000	0.000	0.000	0.134	0.246	0.131	0.059	0.000	hypothetical protein D5086_0000138580 [Populus alba]
BolSC45t60918H	0.216	0.000	0.000	0.235	0.236	0.434	0.000	0.000	0.000	hypothetical protein E3N88_13121 [Mikania micrantha]
BolSC45t60919H	0.000	0.000	0.000	0.000	0.000	0.392	0.000	0.000	0.000	unnamed protein product [Brassica oleracea]
BolSC45t60920H	0.000	0.076	0.071	0.000	0.137	0.944	0.000	0.061	0.065	unnamed protein product, partial [Brassica oleracea]
BolSC45t60921H	0.000	0.000	0.000	0.000	0.000	0.000	0.099	0.000	0.000	small subunit ribosomal protein S7 [Vigna unguiculata]
BolSC45t60922H	0.000	0.000	0.039	0.000	0.000	0.000	0.037	0.000	0.000	NADH-plastoquinone oxidoreductase subunit 2 [Cardamine oligosperma]
BolSC45t60923H	0.000	0.000	0.000	0.000	0.000	0.000	0.000	0.000	0.000	hypothetical protein ARALYDRAFT_894061 [Arabidopsis lyrata subsp. lyrata]
BolSC45t60924H	0.000	0.000	0.000	0.000	0.000	0.000	0.000	0.000	0.000	ycf2 [Brassica napus]
BolSC45t60925H	0.073	0.000	0.000	0.000	0.000	0.024	0.000	0.000	0.000	ycf2 [Brassica napus]
BolSC45t60926H	0.000	0.000	0.000	0.000	0.000	0.392	0.000	0.000	0.000	ribosomal protein L23 [Chaenomeles speciosa]
BolSC45t60927H	0.000	0.000	0.057	0.000	0.000	0.152	0.000	0.000	0.000	rpl2 protein [Arabis alpina]
BolSC45t60928H	0.000	0.000	0.000	0.000	0.000	0.000	0.000	0.000	0.000	PsbA [Senna siamea]
BolSC45t60929H	0.066	0.160	0.075	0.215	0.072	0.199	0.000	0.000	0.000	maturase K [Brassica napus]
BolSC45t60930H	0.000	0.000	0.000	0.000	0.000	0.000	0.000	0.000	0.000	ribosomal protein S16 [Raphanus sativus var. raphanistroides]
BolSC45t60931H	0.000	0.275	0.000	0.000	0.000	0.227	0.000	0.000	0.000	photosystem II protein K [Orychophragmus taibaiensis]
BolSC45t60932H	0.000	0.000	0.000	0.000	0.000	0.000	0.000	0.000	0.000	AtpA [Brassica oleracea var. italica]
BolSC45t60933H	0.000	0.000	0.000	0.000	0.000	0.071	0.000	0.000	0.000	ATPase I subunit [Bunias erucago]
BolSC45t60934H	0.000	0.000	0.000	0.000	0.000	0.000	0.000	0.227	0.000	hypothetical protein E1A91_D10G257700v1 [Gossypium mustelinum]
BolSC45t60935H	0.000	0.000	0.100	0.000	0.000	0.000	0.094	0.085	0.000	AtpI [Brassica nigra]
BolSC45t60936H	0.059	0.216	0.000	0.000	0.000	0.000	0.063	0.000	0.000	ribosomal protein S2 [Ionopsidium abulense]
BolSC45t60937H	0.058	0.028	0.000	0.013	0.000	0.012	0.012	0.011	0.000	RpoC2 [Raphanus sativus var. raphanistroides]
BolSC45t60938H	0.119	0.072	0.000	0.000	0.000	0.059	0.000	0.000	0.000	RNA polymerase A beta prime subunit [Sinapis alba]
BolSC45t60939H	0.191	0.174	0.000	0.000	0.052	0.288	0.000	0.000	0.000	RpoC1 [Alyssum desertorum]
BolSC45t60940H	0.090	0.065	0.102	0.078	0.039	0.036	0.038	0.035	0.018	RNA polymerase beta subunit [Brassica rapa]
BolSC45t60941H	0.000	0.000	0.000	0.000	0.000	0.000	0.000	0.000	0.000	photosystem II reaction center protein M [Brassica oleracea var. italica]
BolSC45t60942H	0.000	0.000	0.000	0.000	0.000	0.000	0.000	0.000	0.000	photosynthetic reaction centre, L/M, Photosystem antenna protein-like protein, plastid [Artemisia annua]
BolSC45t60943H	0.000	0.000	0.000	0.000	0.000	0.059	0.000	0.028	0.000	photosystem I P700 chlorophyll a apoprotein A2 [Cochlearia scotica]
BolSC45t60944H	0.000	0.000	0.000	0.000	0.000	0.137	0.049	0.044	0.000	photosystem I P700 apoprotein A1 [Ludwigia octovalvis]
BolSC45t60945H	0.000	0.000	0.000	0.000	0.000	0.000	0.000	0.000	0.000	hypothetical chloroplast RF3 [Zabelia integrifolia]
BolSC45t60946H	0.000	0.000	0.000	0.000	0.000	0.000	0.000	0.000	0.000	ribosomal protein S4 [Sinalliaria limprichtiana]
BolSC45t60947H	0.000	0.000	0.000	0.060	0.000	0.000	0.234	0.000	0.113	NADH dehydrogenase subunit J, chloroplast [Artemisia annua]
BolSC45t60948H	0.000	0.000	0.000	0.000	0.000	0.000	0.000	0.000	0.000	NdhC [Brassica juncea subsp. integrifolia]
BolSC45t60949H	0.000	0.000	0.000	0.000	0.000	0.000	0.000	0.000	0.000	ATP synthase beta subunit [Brassica napus]
BolSC45t60950H	0.000	0.000	0.000	0.000	0.044	0.000	0.000	0.000	0.000	ribulose-1,5-bisphosphate carboxylase/oxygenase large subunit [Brassica juncea subsp. integrifolia]
BolSC45t60951H	0.000	0.000	0.000	0.000	0.000	0.000	0.000	0.000	0.000	acetyl-CoA carboxylase carbosyltransferase beta subunit [Lagenaria siceraria]
BolSC45t60952H	0.000	0.000	0.000	0.000	0.000	0.000	0.000	0.000	0.000	photosystem I subunit VIII [Ionopsidium abulense]
BolSC46t60953H	0.000	0.000	0.000	0.000	0.000	0.000	0.000	0.000	0.000	hypothetical protein C4D60_Mb00t11710 [Musa balbisiana]
BolSC46t60954H	0.000	0.000	0.000	0.000	0.000	0.000	0.000	0.000	0.000	unnamed protein product [Brassica oleracea]
BolSC46t60955H	0.000	0.000	0.075	0.071	0.000	0.066	0.000	0.064	0.068	NADH-plastoquinone oxidoreductase subunit 1 [Cakile arabica]
BolSC46t60956H	0.000	0.000	0.000	0.000	0.000	0.000	0.000	0.000	0.000	NADH dehydrogenase 18 kDa subunit [Arabis hirsuta]
BolSC46t60957H	0.000	0.000	0.000	0.000	0.000	0.201	0.000	0.000	0.000	NdhG [Brassica napus var. napus]
BolSC46t60958H	0.000	0.000	0.000	0.000	0.000	0.000	0.000	0.000	0.000	NADH dehydrogenase ND4L [Draba nemorosa]
BolSC46t60959H	0.171	0.000	0.000	0.000	0.000	0.516	0.548	0.166	0.000	photosystem I subunit VII [Aconitum sinomontanum]
BolSC46t60960H	0.073	0.000	0.000	0.000	0.000	0.183	0.117	0.000	0.000	NdhD [Raphanus sativus var. sativus]
BolSC46t60961H	0.000	0.000	0.048	0.000	0.000	0.000	0.000	0.000	0.000	cytochrome c biogenesis protein [Sisymbrium irio]
BolSC46t60962H	0.000	0.000	0.000	0.000	0.000	0.000	0.000	0.000	0.000	unnamed protein product [Brassica oleracea]
BolSC46t60963H	0.067	0.082	0.115	0.000	0.037	0.034	0.000	0.000	0.000	NADH-plastoquinone oxidoreductase subunit 5 [Cakile arabica]
BolSC46t60964H	0.000	0.000	0.000	0.141	0.000	0.065	0.000	0.063	0.000	Ycf1 [Brassica oleracea var. italica]
BolSC46t60965H	0.000	0.000	0.000	0.000	0.158	0.872	0.309	0.000	0.000	metallocarboxypeptidase inhibitor [Tanacetum cinerariifolium]
BolSC46t60966H	0.170	0.413	0.064	0.431	0.494	2.217	1.088	0.768	0.351	unnamed protein product [Brassica rapa]
BolSC46t60967H	0.000	0.000	0.000	0.000	0.000	0.434	0.231	0.419	0.000	hypothetical protein E3N88_13121 [Mikania micrantha]
BolSC46t60968H	0.000	0.000	0.000	0.000	0.000	0.000	0.000	0.000	0.000	unnamed protein product, partial [Brassica oleracea]
BolSC46t60969H	0.000	0.000	0.000	0.000	0.000	0.000	0.000	0.000	0.000	BnaCnng13060D [Brassica napus]
BolSC46t60970H	0.000	0.000	0.000	0.000	0.000	0.000	0.000	0.000	0.000	ribosomal protein S7 [Ophrys sphegodes]
BolSC46t60971H	0.000	0.000	0.000	0.000	0.000	0.049	0.000	0.000	0.000	hypothetical protein C5167_019304 [Papaver somniferum]
BolSC46t60972H	0.000	0.000	0.000	0.000	0.000	0.095	0.000	0.000	0.000	hypothetical protein ARALYDRAFT_894061 [Arabidopsis lyrata subsp. lyrata]
BolSC46t60973H	0.000	0.000	0.000	0.000	0.000	0.000	0.000	0.000	0.000	ycf2 [Brassica napus]
BolSC46t60974H	0.000	0.000	0.000	0.000	0.000	0.000	0.000	0.000	0.000	ycf2 [Brassica napus]
BolSC46t60975H	0.000	0.000	0.000	0.000	0.426	0.000	0.416	0.000	0.000	ribosomal protein L23 [Chaenomeles speciosa]
BolSC46t60976H	0.000	0.000	0.000	0.000	0.000	0.000	0.000	0.000	0.000	putative ribosomal protein L2, Ribosomal protein L25/L23 [Helianthus annuus]
BolSC46t60977H	0.000	0.000	0.064	0.122	0.184	0.226	0.180	0.000	0.000	PsbA [Senna siamea]
BolSC46t60978H	0.000	0.000	0.000	0.000	0.000	0.000	0.070	0.000	0.000	maturase K [Brassica napus]
BolSC46t60979H	0.000	0.000	0.000	0.000	0.000	0.000	0.000	0.000	0.000	ribosomal protein S16 [Farsetia stylosa]
BolSC46t60980H	0.000	0.000	0.000	0.000	0.000	0.000	0.000	0.000	0.000	photosystem II protein K [Orychophragmus taibaiensis]
BolSC46t60981H	0.000	0.000	0.000	0.000	0.000	0.381	0.405	0.736	0.000	photosystem II protein I [Bertholletia excelsa]
BolSC46t60982H	0.111	0.067	0.000	0.120	0.091	0.222	0.118	0.027	0.000	ATPase alpha subunit [Sisymbrium irio]
BolSC46t60983H	0.215	0.000	0.000	0.156	0.000	1.510	0.076	0.555	0.148	ATPase I subunit [Bunias erucago]
BolSC46t60984H	0.000	0.000	0.000	0.000	0.000	0.000	0.000	0.000	0.000	ATP synthase CF0 subunit III [Ficus racemosa]
BolSC46t60985H	0.000	0.000	0.000	0.000	0.000	0.000	0.000	0.000	0.000	AtpI [Brassica nigra]
BolSC46t60986H	0.000	0.000	0.000	0.000	0.000	0.000	0.000	0.000	0.000	ribosomal protein S2 [Farsetia stylosa]
BolSC46t60987H	0.000	0.000	0.000	0.000	0.000	0.000	0.000	0.000	0.000	RNA polymerase beta subunit [Crambe hispanica subsp. abyssinica]
BolSC46t60988H	0.000	0.000	0.000	0.000	0.000	0.000	0.000	0.000	0.000	photosystem II reaction center protein M [Brassica oleracea var. italica]
BolSC46t60989H	0.000	0.000	0.000	0.000	0.000	0.124	0.000	0.000	0.000	photosystem II protein D2 [Telosma cordata]
BolSC46t60990H	0.000	0.000	0.000	0.064	0.032	0.206	0.031	0.057	0.000	photosystem I P700 chlorophyll a apoprotein A2 [Cochlearia scotica]
BolSC46t60991H	0.000	0.000	0.000	0.000	0.000	0.000	0.000	0.000	0.000	photosystem I P700 apoprotein A1 [Ludwigia octovalvis]
BolSC46t60992H	0.000	0.000	0.000	0.000	0.000	0.000	0.000	0.000	0.000	photosystem I assembly protein Ycf3 [Eutrema tenue]
BolSC46t60993H	0.000	0.000	0.000	0.000	0.000	0.000	0.000	0.000	0.000	ribosomal protein S4 [Sinalliaria limprichtiana]
BolSC46t60994H	0.061	0.000	0.000	0.000	0.000	0.061	0.065	0.059	0.000	NADH-quinone oxidoreductase protein [Medicago truncatula]
BolSC46t60995H	0.000	0.000	0.264	0.000	0.000	0.117	0.124	0.112	0.000	NdhC [Brassica juncea subsp. integrifolia]
BolSC46t60996H	0.000	0.000	0.000	0.000	0.000	0.030	0.000	0.000	0.031	ATP synthase beta subunit [Brassica napus]
BolSC46t60997H	0.000	0.000	0.000	0.032	0.000	0.000	0.000	0.000	0.000	ribulose 1,5-bisphosphate carboxylase/oxygenase large subunit [Crambe hispanica subsp. abyssinica]
BolSC46t60998H	0.000	0.000	0.000	0.000	0.000	0.000	0.000	0.000	0.000	RecName: Full=Acetyl-coenzyme A carboxylase carboxyl transferase subunit beta, chloroplastic; Short=ACCase subunit beta; Short=Acetyl-CoA carboxylase carboxyltransferase subunit beta [Brassica napus]
BolSC46t60999H	0.000	0.000	0.000	0.000	0.000	0.000	0.000	0.000	0.000	photosystem I subunit VIII [Cleomella serrulata]
BolSC46t61000H	0.000	0.000	0.000	0.000	0.000	0.000	0.000	0.000	0.000	Ycf4 [Raphanus sativus var. raphanistroides]
BolSC46t61001H	0.000	0.000	0.000	0.000	0.000	0.000	0.000	0.000	0.000	chloroplast envelope membrane protein A [Neotorularia korolkowii]
BolSC46t61002H	0.000	0.000	0.000	0.000	0.000	0.000	0.000	0.000	0.000	unnamed protein product [Brassica oleracea]
BolSC46t61003H	0.000	0.000	0.000	0.000	0.000	0.000	0.000	0.332	0.000	PsbJ [Heracleum candicans]
BolSC46t61004H	0.000	0.000	0.000	0.000	0.000	0.000	0.000	0.349	0.000	photosystem II protein L [Lespedeza floribunda]
BolSC46t61005H	0.000	0.000	0.000	0.000	0.000	0.000	0.000	0.000	0.000	cytochrome b559 alpha chain [Dipteronia sinensis]
BolSC46t61006H	0.000	0.000	0.000	0.000	0.000	1.113	0.000	0.000	0.000	cytochrome b6-F complex subunit 5 [Medicago truncatula]
BolSC46t61007H	0.000	0.000	0.000	0.000	0.000	0.000	0.000	0.000	0.000	unnamed protein product [Brassica oleracea]
BolSC46t61008H	0.000	0.000	0.000	0.000	0.000	0.000	0.000	0.000	0.000	ribosomal protein S18 [Lobularia maritima]
BolSC46t61009H	0.000	0.000	0.000	0.000	0.000	0.000	0.000	0.000	0.000	ribosomal protein S12 [Ranunculus austro-oreganus]
BolSC46t61010H	0.000	0.000	0.000	0.000	0.000	0.000	0.000	0.000	0.000	ClpP [Raphanus sativus var. raphanistroides]
BolSC46t61011H	0.305	0.000	0.694	0.000	0.000	0.306	0.000	0.000	0.000	ATP-dependent protease subunit [Ricotia cretica]
BolSC46t61012H	0.000	0.000	0.000	0.052	0.104	0.288	0.000	0.046	0.000	photosystem II P680 chlorophyll A apoprotein [Arabis hirsuta]
BolSC46t61013H	0.000	0.000	0.000	0.000	0.000	0.000	0.000	0.000	0.000	photosystem II protein T [Salpianthus macrodontus]
BolSC46t61014H	0.000	0.000	0.000	0.000	0.000	0.000	0.000	0.000	0.000	photosystem II protein N [Paris tetraphylla]
BolSC46t61015H	0.000	0.000	0.000	0.000	0.000	0.000	0.000	0.000	0.000	photosystem II protein H [Arabis hirsuta]
BolSC46t61016H	0.000	0.000	0.000	0.000	0.000	0.000	0.000	0.000	0.000	cytochrome b6 [Trifolium subterraneum]
BolSC46t61017H	0.000	0.000	0.000	0.000	0.000	0.000	0.000	0.000	0.000	cytochrome b6/f complex subunit IV [Lobelia baumannii]
BolSC46t61018H	0.059	0.000	0.000	0.000	0.000	0.000	0.125	0.057	0.000	RpoA [Brassica juncea subsp. integrifolia]
BolSC46t61019H	0.000	0.000	0.000	0.000	0.000	0.000	0.000	0.000	0.000	ribosomal protein S11 [Cleomella serrulata]
BolSC46t61020H	0.000	0.000	0.000	0.000	0.000	0.000	0.000	0.000	0.000	RNA polymerase alpha subunit [Dontostemon micranthus]
BolSC46t61021H	0.000	0.000	0.000	0.000	0.000	0.000	0.000	0.000	0.000	PetB [Dendrosenecio battiscombei]
BolSC46t61022H	0.000	0.000	0.000	0.000	0.000	0.000	0.000	0.000	0.000	photosystem II protein H [Arabis hirsuta]
BolSC46t61023H	0.000	0.000	0.000	0.000	0.000	0.000	0.000	0.000	0.000	photosystem II protein N [Sonneratia alba]
BolSC46t61024H	0.000	0.000	0.000	0.000	0.000	0.000	0.000	0.000	0.000	photosystem II protein T [Eutrema tenue]
BolSC46t61025H	0.000	0.000	0.000	0.000	0.000	0.000	0.000	0.000	0.000	PsbB, partial [Epistephium lucidum]
BolSC46t61026H	1.338	0.271	0.506	0.000	0.243	0.000	0.000	0.000	0.000	ribosomal protein S12 [Ranunculus austro-oreganus]
BolSC46t61027H	0.000	0.000	0.000	0.000	0.000	0.000	0.000	0.000	0.000	ribosomal protein L33 [Ricotia cretica]
BolSC46t61028H	0.000	0.000	0.000	0.000	0.000	0.000	0.000	0.000	0.000	cytochrome b6-F complex subunit 5 [Medicago truncatula]
BolSC46t61029H	0.000	0.203	0.000	0.000	0.000	0.168	0.357	0.324	0.345	cytochrome b559 alpha chain [Dipteronia sinensis]
BolSC46t61030H	0.000	0.000	0.000	0.000	0.000	0.000	0.375	0.000	0.362	photosystem II cytochrome b559 beta chain [Solenopsis bivonae]
BolSC46t61031H	0.000	0.000	0.000	0.000	0.000	0.000	0.000	0.000	0.000	photosystem II protein L [Lespedeza floribunda]
BolSC46t61032H	0.000	0.000	0.000	0.000	0.000	0.000	0.000	0.000	0.000	PsbJ [Heracleum candicans]
BolSC46t61033H	0.000	0.000	0.000	0.048	0.000	0.088	0.000	0.000	0.000	cytochrome f [Sinalliaria limprichtiana]
BolSC46t61034H	0.000	0.000	0.000	0.000	0.000	0.000	0.000	0.000	0.000	chloroplast envelope membrane protein A [Neotorularia korolkowii]
BolSC46t61035H	0.117	0.000	0.000	0.000	0.000	0.000	0.000	0.000	0.000	photosystem I assembly protein Ycf4 [Thlaspi arvense]
BolSC46t61036H	0.000	0.000	0.000	0.000	0.000	0.000	0.000	0.000	0.000	photosystem I subunit VIII [Cleomella serrulata]
BolSC46t61037H	0.000	0.000	0.000	0.000	0.000	0.000	0.000	0.000	0.000	Acetyl-CoA carboxylase carboxyltransferase beta subunit [Lobularia libyca]
BolSC46t61038H	0.000	0.080	0.000	0.000	0.215	0.198	0.280	0.000	0.000	ribulose-1,5-bisphosphate carboxylase/oxygenase large subunit, partial [Sinapis arvensis]
BolSC46t61039H	0.000	0.000	0.000	0.000	0.000	0.000	0.000	0.039	0.042	ATP synthase beta subunit [Brassica napus]
BolSC46t61040H	0.116	0.000	0.000	0.000	0.000	0.000	0.248	0.112	0.000	NdhC [Brassica juncea subsp. integrifolia]
BolSC46t61041H	0.000	0.000	0.000	0.000	0.000	0.056	0.000	0.000	0.000	NADH dehydrogenase subunit J, chloroplast [Artemisia annua]
BolSC46t61042H	0.000	0.000	0.000	0.000	0.000	0.000	0.000	0.000	0.000	ribosomal protein S4 [Sinalliaria limprichtiana]
BolSC46t61043H	0.201	0.244	0.912	0.436	0.219	0.806	0.000	0.000	0.000	photosystem I assembly protein Ycf3 [Eutrema tenue]
BolSC46t61044H	0.000	0.000	0.000	0.000	0.000	0.000	0.000	0.000	0.000	photosystem I P700 apoprotein A1 [Crambe hispanica subsp. abyssinica]
BolSC46t61045H	0.000	0.000	0.000	0.000	0.000	0.000	0.000	0.000	0.000	PsaB [Brassica nigra]
BolSC46t61046H	0.000	0.000	0.000	0.039	0.078	0.214	0.000	0.000	0.000	photosystem I P700 chlorophyll a apoprotein A2 [Cochlearia scotica]
BolSC46t61047H	0.000	0.109	0.102	0.000	0.098	0.181	0.096	0.087	0.000	photosystem II protein D2 [Simmondsia chinensis]
BolSC46t61048H	0.000	0.000	0.000	0.000	0.000	0.000	0.000	0.000	0.000	unnamed protein product, partial [Brassica oleracea]
BolSC47t61049H	0.000	0.000	0.000	0.000	0.000	0.000	0.000	0.000	0.000	unnamed protein product [Brassica oleracea]
BolSC47t61050H	0.000	0.000	0.000	0.000	0.000	0.000	0.000	0.000	0.000	unnamed protein product [Brassica oleracea]
BolSC47t61051H	0.000	0.000	0.000	0.000	0.000	0.000	0.000	0.000	0.000	ribosomal protein L23 [Chaenomeles speciosa]
BolSC47t61052H	0.000	0.000	0.000	0.000	0.000	0.000	0.000	0.000	0.000	Ycf2 [Brassica juncea subsp. integrifolia]
BolSC47t61053H	0.000	0.000	0.000	0.000	0.000	0.000	0.000	0.000	0.000	ycf2 [Brassica napus]
BolSC47t61054H	0.000	0.000	0.000	0.000	0.000	0.000	0.000	0.000	0.000	hypothetical chloroplast RF21 [Arabidopsis lyrata subsp. petraea]
BolSC47t61055H	0.000	0.000	0.000	0.000	0.000	0.000	0.000	0.000	0.000	unnamed protein product, partial [Brassica oleracea]
BolSC47t61056H	0.000	0.000	0.000	0.000	0.000	0.000	0.000	0.000	0.000	Os04g0473025, partial [Oryza sativa Japonica Group]
BolSC47t61057H	0.000	0.000	0.000	0.000	0.000	0.000	0.000	0.000	0.000	small subunit ribosomal protein S7 [Vigna unguiculata]
BolSC47t61058H	0.000	0.000	0.000	0.000	0.000	0.000	0.000	0.000	0.000	unnamed protein product, partial [Brassica oleracea]
BolSC47t61059H	0.000	0.000	0.000	0.000	0.000	0.000	0.167	0.000	0.000	unnamed protein product [Microthlaspi erraticum]
BolSC47t61060H	0.000	0.000	0.000	0.000	0.000	0.000	0.000	0.000	0.000	ycf1 [Arabidopsis arenosa]
BolSC47t61061H	0.101	0.061	0.057	0.000	0.055	0.051	0.000	0.000	0.000	Ycf1 [Brassica napus var. napus]
BolSC47t61062H	0.000	0.000	0.000	0.000	0.042	0.039	0.000	0.000	0.000	NADH-plastoquinone oxidoreductase subunit 1 [Cakile arabica]
BolSC47t61063H	0.000	0.000	0.000	0.000	0.000	0.000	0.000	0.000	0.000	NADH dehydrogenase 18 kDa subunit [Arabis hirsuta]
BolSC47t61064H	0.159	0.000	0.090	0.086	0.173	0.159	0.000	0.154	0.000	NdhG [Brassica napus var. napus]
BolSC47t61065H	0.000	0.000	0.000	0.000	0.000	0.000	0.000	0.000	0.000	NADH dehydrogenase ND4L [Draba nemorosa]
BolSC47t61066H	0.049	0.000	0.000	0.000	0.000	0.000	0.000	0.000	0.000	NdhD [Brassica napus var. napus]
BolSC47t61067H	0.000	0.000	0.000	0.000	0.000	0.000	0.000	0.000	0.000	cytochrome c biogenesis protein [Sisymbrium irio]
BolSC47t61068H	0.136	0.497	0.000	0.445	0.744	3.422	1.164	0.793	0.282	ATP synthase subunit beta, chloroplastic [Tanacetum cinerariifolium]
BolSC47t61069H	0.000	0.000	0.000	0.000	0.000	0.000	0.000	0.000	0.000	ribosomal protein S12 [Calotropis procera]
BolSC47t61070H	0.000	0.000	0.000	0.000	0.000	0.000	0.000	0.000	0.000	unnamed protein product [Brassica rapa]
BolSC47t61071H	0.000	0.000	0.000	0.000	0.000	0.000	0.000	0.000	0.000	ycf2 [Brassica napus]
BolSC47t61072H	0.000	0.000	0.000	0.000	0.000	0.000	0.000	0.000	0.000	ycf2 [Brassica napus]
BolSC47t61073H	0.000	0.000	0.000	0.000	0.000	0.000	0.000	0.000	0.000	ycf2, partial [Brassica rapa]
BolSC47t61074H	0.000	0.000	0.000	0.000	0.000	0.000	0.000	0.000	0.000	ycf2 [Brassica napus]
BolSC47t61075H	0.000	0.000	0.000	0.000	0.000	0.000	0.000	0.000	0.000	ribosomal protein L23 [Chaenomeles speciosa]
BolSC47t61076H	0.000	0.000	0.000	0.000	0.000	0.000	0.000	0.000	0.000	ribosomal protein L2 [Sinalliaria limprichtiana]
BolSC47t61077H	0.000	0.000	0.000	0.000	0.000	0.000	0.000	0.000	0.000	RNA polymerase alpha subunit [Dontostemon micranthus]
BolSC47t61078H	0.000	0.097	0.000	0.087	0.438	0.000	0.000	0.467	0.000	cytochrome b6/f complex subunit IV [Arabidopsis lyrata]
BolSC47t61079H	0.325	0.079	0.000	0.071	0.426	1.110	2.012	0.567	0.067	cytochrome b6 [Tetraena mongolica]
BolSC47t61080H	0.000	0.230	0.000	0.000	0.000	0.953	1.620	0.000	0.000	photosystem II protein H [Arabis hirsuta]
BolSC47t61081H	0.000	0.388	0.000	0.000	0.000	0.000	0.000	0.000	0.000	photosystem II protein N [Paris tetraphylla]
BolSC47t61082H	0.000	0.000	0.000	0.000	0.438	0.000	0.000	0.000	0.000	unnamed protein product [Brassica oleracea]
BolSC47t61083H	0.000	0.000	0.000	0.000	0.000	0.000	0.101	0.137	0.049	PsbB [Cardamine resedifolia]
BolSC47t61084H	0.000	0.000	0.000	0.000	0.000	0.000	0.000	0.000	0.000	ATP-dependent protease subunit [Ricotia cretica]
BolSC47t61085H	0.000	0.271	0.253	0.000	0.000	0.000	0.000	0.000	0.000	ribosomal protein S12 [Ranunculus austro-oreganus]
BolSC47t61086H	0.000	0.145	0.541	0.000	0.000	0.119	0.000	0.231	0.000	ribosomal protein L20 [Eutrema heterophyllum]
BolSC47t61087H	0.000	0.000	0.000	0.000	0.000	0.395	0.000	0.127	0.000	ribosomal protein S18 [Lobularia maritima]
BolSC47t61088H	0.000	0.000	0.000	0.000	0.229	0.000	0.000	0.000	0.216	ribosomal protein L33 [Ricotia cretica]
BolSC47t61089H	0.000	0.000	1.484	0.000	1.069	3.934	3.486	1.899	2.360	PSI J protein [Clausia aprica]
BolSC47t61090H	0.000	0.000	0.000	0.000	0.807	0.000	0.394	0.358	0.000	cytochrome b6-F complex subunit 5 [Medicago truncatula]
BolSC47t61091H	0.000	0.203	0.190	0.000	0.182	0.168	0.357	0.324	0.000	photosystem II protein V [Cabomba caroliniana]
BolSC47t61092H	0.000	0.426	0.000	0.000	0.000	0.000	1.124	0.680	0.000	photosystem II cytochrome b559 beta chain [Solenopsis bivonae]
BolSC47t61093H	0.000	0.437	0.818	0.000	0.393	0.361	1.537	1.047	0.744	photosystem II protein L [Lespedeza floribunda]
BolSC47t61094H	0.343	0.832	0.778	0.000	1.122	1.375	0.731	0.332	1.768	PsbJ [Heracleum candicans]
BolSC47t61095H	0.051	0.123	0.000	0.000	0.000	0.051	0.162	0.147	0.156	apocytochrome f precursor [Arabis flagellosa]
BolSC47t61096H	0.000	0.000	0.000	0.066	0.000	0.184	0.065	0.059	0.063	chloroplast envelope membrane protein A [Neotorularia korolkowii]
BolSC47t61097H	0.000	0.000	0.000	0.000	0.000	0.000	0.000	0.000	0.000	photosystem I assembly protein Ycf4 [Thlaspi arvense]
BolSC47t61098H	0.000	0.000	0.000	0.000	0.000	0.000	0.000	0.000	0.000	photosystem I subunit VIII [Chorispora tenella]
BolSC47t61099H	0.032	0.116	0.036	0.035	0.000	0.096	0.000	0.000	0.033	RecName: Full=Acetyl-coenzyme A carboxylase carboxyl transferase subunit beta, chloroplastic; Short=ACCase subunit beta; Short=Acetyl-CoA carboxylase carboxyltransferase subunit beta [Brassica napus]
BolSC47t61100H	0.000	0.000	0.000	0.099	0.200	0.781	0.488	0.177	0.000	ribulose-1,5-bisphosphate carboxylase/oxygenase large subunit, partial [Sinapis arvensis]
BolSC47t61101H	0.000	0.000	0.000	0.000	0.000	0.027	0.029	0.000	0.000	PREDICTED: ATP synthase subunit beta, chloroplastic-like [Gossypium hirsutum]
BolSC47t61102H	0.000	0.000	0.000	0.000	0.127	0.000	0.124	0.000	0.000	NdhC [Brassica juncea subsp. integrifolia]
BolSC47t61103H	0.000	0.000	0.000	0.061	0.061	0.000	0.059	0.054	0.000	NADH dehydrogenase subunit J, chloroplast [Artemisia annua]
BolSC47t61104H	0.167	0.000	0.000	0.000	0.000	0.000	0.535	0.000	0.000	ribosomal protein S4 [Sinalliaria limprichtiana]
BolSC47t61105H	0.000	0.000	0.000	0.000	0.000	0.000	0.000	0.000	0.000	hypothetical chloroplast RF34 [Plagiobothrys nothofulvus]
BolSC47t61106H	0.000	0.000	0.409	0.000	0.000	0.000	0.000	0.349	0.000	photosystem I assembly protein Ycf3 [Eutrema tenue]
BolSC47t61107H	0.000	0.000	0.000	0.000	0.000	0.000	0.000	0.000	0.000	photosystem I P700 chlorophyll a apoprotein A1 [Cochlearia tridactylites]
BolSC47t61108H	0.000	0.000	0.000	0.000	0.000	0.082	0.087	0.000	0.000	PsaB [Brassica nigra]
BolSC47t61109H	0.000	0.000	0.000	0.000	0.000	0.000	0.000	0.000	0.000	photosystem II protein Z [Santalum boninense]
BolSC47t61110H	0.000	0.000	0.000	0.000	0.091	0.042	0.000	0.041	0.000	PSII D2 protein [Spinacia oleracea]
BolSC47t61111H	0.000	0.000	0.000	0.000	0.000	0.000	0.000	0.778	0.000	photosystem II reaction center protein M [Brassica oleracea var. italica]
BolSC47t61112H	0.000	0.000	0.000	0.000	0.000	0.000	0.000	0.000	0.000	photosystem II CP43 chlorophyll apoprotein [Arabidopsis lyrata subsp. petraea]
BolSC47t61113H	0.000	0.271	0.000	0.000	0.000	0.000	0.000	0.000	0.000	photosystem II protein Z [Santalum boninense]
BolSC47t61114H	0.000	0.000	0.000	0.000	0.000	0.000	0.068	0.000	0.000	PSI P700 apoprotein A2 [Draba nemorosa]
BolSC47t61115H	0.000	0.000	0.000	0.000	0.000	0.000	0.000	0.000	0.000	photosystem I P700 chlorophyll a apoprotein A1 [Cochlearia tridactylites]
BolSC47t61116H	0.000	0.000	0.000	0.000	0.000	0.313	0.000	0.000	0.000	unnamed protein product, partial [Brassica oleracea]
BolSC47t61117H	0.000	0.000	0.000	0.000	0.000	0.000	0.000	0.000	0.000	photosystem I assembly protein Ycf3 [Eutrema tenue]
BolSC47t61118H	0.000	0.000	0.000	0.000	0.000	0.000	0.000	0.000	0.000	photosystem I assembly protein Ycf3 [Eutrema tenue]
BolSC47t61119H	0.000	0.000	0.000	0.000	0.000	0.000	0.000	0.000	0.000	ribosomal protein S4 [Woodfordia fruticosa]
BolSC47t61120H	0.000	0.000	0.000	0.000	0.000	0.000	0.000	0.000	0.000	NADH dehydrogenase subunit J, partial [Solanum tuberosum]
BolSC47t61121H	0.000	0.000	0.000	0.000	0.000	0.000	0.000	0.000	0.000	NdhK [Brassica nigra]
BolSC47t61122H	0.000	0.000	0.000	0.000	0.000	0.000	0.000	0.000	0.000	NADH dehydrogenase subunit 3 [Ionopsidium megalospermum]
BolSC47t61123H	0.000	0.000	0.000	0.184	0.000	0.000	0.000	0.000	0.000	ATP synthase beta subunit, partial [Triglochin maritima]
BolSC47t61124H	0.000	0.000	0.000	0.000	0.000	0.191	0.000	0.184	0.000	ribulose-1,5-bisphosphate carboxylase/oxygenase large subunit, partial [Asclepias syriaca]
BolSC47t61125H	0.000	0.000	0.000	0.000	0.000	0.000	0.000	0.000	0.000	RecName: Full=Acetyl-coenzyme A carboxylase carboxyl transferase subunit beta, chloroplastic; Short=ACCase subunit beta; Short=Acetyl-CoA carboxylase carboxyltransferase subunit beta [Brassica napus]
BolSC47t61126H	0.000	0.000	0.000	0.000	0.000	0.000	0.000	0.000	0.000	unnamed protein product, partial [Brassica oleracea]
BolSC49t61127H	0.000	0.000	0.000	0.000	0.000	0.000	0.000	0.000	0.000	ycf2 [Brassica napus]
BolSC49t61128H	0.000	0.058	0.000	0.000	0.000	0.000	0.000	0.000	0.000	ycf2 [Brassica napus]
BolSC49t61129H	0.000	0.000	0.000	0.000	0.000	0.000	0.000	0.000	0.000	ORF126 [Jatropha curcas]
BolSC49t61130H	0.000	0.000	0.000	0.000	0.000	0.000	0.000	0.000	0.000	NADH-plastoquinone oxidoreductase subunit 2 [Landoltia punctata]
BolSC49t61131H	0.000	0.000	0.000	0.000	0.000	0.000	0.000	0.000	0.000	small subunit ribosomal protein S7 [Vigna unguiculata]
BolSC49t61132H	0.000	0.000	0.152	0.000	0.146	0.269	0.000	0.000	0.000	unnamed protein product [Microthlaspi erraticum]
BolSC49t61133H	0.000	0.000	0.000	0.470	0.000	0.217	0.000	0.000	0.000	hypothetical protein E3N88_13121 [Mikania micrantha]
BolSC49t61134H	0.000	0.354	0.066	0.127	0.382	2.515	1.368	0.791	0.421	unnamed protein product [Brassica oleracea]
BolSC49t61135H	0.000	0.000	0.000	0.000	0.000	0.000	0.000	0.000	0.000	hypothetical protein CJ030_MR1G029169 [Morella rubra]
BolSC49t61136H	0.246	0.000	0.280	0.000	0.000	0.000	0.000	0.000	0.000	unnamed protein product [Brassica oleracea]
BolSC49t61137H	0.000	0.000	0.000	0.000	0.000	0.028	0.000	0.107	0.000	NADH dehydrogenase subunit F, partial [Brassica napus]
BolSC49t61138H	0.000	0.000	0.000	0.000	0.000	0.000	0.000	0.000	0.000	NADH-plastoquinone oxidoreductase subunit 5 [Cakile arabica]
BolSC49t61139H	0.000	0.000	0.000	0.000	0.000	0.000	0.000	0.000	0.000	unnamed protein product [Brassica oleracea]
BolSC49t61140H	0.000	0.000	0.000	0.000	0.000	0.000	0.000	0.000	0.000	cytochrome c biogenesis protein [Sisymbrium irio]
BolSC49t61141H	0.000	0.000	0.000	0.000	0.000	0.000	0.240	0.000	0.000	NdhD [Brassica napus var. napus]
BolSC49t61142H	0.000	0.000	0.000	0.000	0.000	0.172	0.548	0.000	0.000	photosystem I subunit VII [Aconitum sinomontanum]
BolSC49t61143H	0.000	0.000	0.000	0.000	0.000	0.000	0.000	0.000	0.000	NADH dehydrogenase ND4L [Draba nemorosa]
BolSC49t61144H	0.127	0.000	0.000	0.000	0.000	0.000	0.135	0.000	0.000	NdhG [Brassica napus var. napus]
BolSC49t61145H	0.000	0.000	0.000	0.000	0.000	0.000	0.000	0.000	0.000	NADH dehydrogenase 18 kDa subunit [Arabis hirsuta]
BolSC49t61146H	0.000	0.000	0.000	0.000	0.000	0.000	0.069	0.000	0.067	NdhA [Brassica juncea subsp. integrifolia]
BolSC49t61147H	0.000	0.197	0.000	0.000	0.000	0.000	0.000	0.000	0.000	NADH dehydrogenase subunit 7 [Orychophragmus zhongtiaoshanus]
BolSC49t61148H	0.000	0.000	0.000	0.000	0.000	0.000	0.000	0.000	0.000	ribosomal protein S15 [Schrenkiella parvula]
BolSC49t61149H	0.000	0.000	0.000	0.000	0.000	0.000	0.000	0.000	0.000	unnamed protein product [Brassica oleracea]
BolSC49t61150H	0.000	0.176	0.000	0.000	0.000	0.000	0.000	0.000	0.000	metallocarboxypeptidase inhibitor [Tanacetum cinerariifolium]
BolSC49t61151H	0.000	0.135	0.000	0.000	0.000	1.007	0.238	0.108	0.000	hypothetical protein D5086_0000138580 [Populus alba]
BolSC49t61152H	0.000	0.000	0.000	0.000	0.000	0.000	0.000	0.000	0.000	hypothetical protein T459_27840 [Capsicum annuum]
BolSC49t61153H	0.000	0.000	0.000	0.112	0.000	0.104	0.000	0.000	0.000	unnamed protein product, partial [Brassica oleracea]
BolSC49t61154H	0.000	0.000	0.181	0.000	0.000	0.000	0.000	0.000	0.000	small subunit ribosomal protein S7 [Vigna unguiculata]
BolSC49t61155H	0.000	0.000	0.000	0.000	0.000	0.000	0.000	0.000	0.000	rps7 [Acacia cyclops]
BolSC49t61156H	0.000	0.000	0.034	0.000	0.000	0.090	0.000	0.029	0.000	NADH dehydrogenase subunit 2 [Daphne genkwa]
BolSC49t61157H	0.000	0.000	0.000	0.000	0.000	0.000	0.000	0.000	0.000	unnamed protein product [Brassica oleracea]
BolSC49t61158H	0.000	0.000	0.000	0.000	0.000	0.000	0.000	0.000	0.000	Ycf2 [Brassica nigra]
BolSC49t61159H	0.000	0.000	0.000	0.000	0.000	0.000	0.000	0.000	0.000	ribosomal protein L23 [Chaenomeles speciosa]
BolSC49t61160H	0.000	0.000	0.000	0.000	0.000	0.000	0.000	0.000	0.000	ribosomal protein L2 [Ricotia lunaria]
BolSC49t61161H	0.105	0.255	0.119	0.000	0.000	0.000	0.000	0.102	0.000	ribosomal protein L16 [Farsetia stylosa]
BolSC49t61162H	0.122	0.000	0.000	0.000	0.267	0.123	0.000	0.000	0.000	ribosomal protein L14 [Capsella bursa-pastoris]
BolSC49t61163H	0.000	0.000	0.000	0.000	0.000	0.000	0.000	0.000	0.000	ribosomal protein S8 [Aethionema grandiflorum]
BolSC49t61164H	0.000	0.000	0.000	0.000	0.000	0.000	0.000	0.000	0.000	30S ribosomal protein S11 [Turritis glabra]
BolSC49t61165H	0.059	0.071	0.000	0.000	0.000	0.059	0.000	0.000	0.000	RNA polymerase alpha subunit [Dontostemon micranthus]
BolSC49t61166H	0.000	0.000	0.000	0.000	0.000	0.000	0.000	0.000	0.000	cytochrome b6/f complex subunit IV [Orychophragmus zhongtiaoshanus]
BolSC49t61167H	0.000	0.000	0.000	0.000	0.000	0.000	0.000	0.000	0.000	PetB [Dendrosenecio battiscombei]
BolSC49t61168H	0.000	0.000	0.000	0.206	0.000	0.762	0.405	0.000	0.000	photosystem II protein H [Arabis hirsuta]
BolSC49t61169H	0.000	0.000	0.000	0.000	0.000	0.000	0.000	0.000	0.000	photosystem II protein N [Paris tetraphylla]
BolSC49t61170H	0.000	0.000	0.000	0.000	0.000	0.000	0.000	0.000	0.000	Photosystem antenna protein-like protein [Cinnamomum micranthum f. kanehirae]
BolSC49t61171H	0.000	0.000	0.000	0.000	0.000	0.000	0.000	0.000	0.000	ClpP [Brassica juncea subsp. integrifolia]
BolSC49t61172H	0.000	0.000	0.000	0.000	0.000	0.000	0.000	0.000	0.000	unnamed protein product [Brassica oleracea]
BolSC49t61173H	0.000	0.000	0.000	0.000	0.000	0.000	0.000	0.000	0.133	ribosomal protein S18 [Orychophragmus zhongtiaoshanus]
BolSC49t61174H	0.000	0.000	0.000	0.000	0.000	0.000	0.000	0.000	0.000	ribosomal protein L33 [Ricotia cretica]
BolSC49t61175H	0.000	0.000	0.000	0.000	0.000	0.000	0.000	0.000	0.000	unnamed protein product, partial [Brassica oleracea]
BolSC49t61176H	0.000	0.000	0.000	0.000	0.000	0.000	0.000	0.000	0.000	cytochrome b6-F complex subunit 5 [Medicago truncatula]
BolSC49t61177H	0.000	0.000	0.192	0.184	0.000	0.679	0.542	0.820	0.524	photosystem II protein V [Cabomba caroliniana]
BolSC49t61178H	0.000	0.000	0.000	0.382	0.000	1.410	1.124	1.361	0.725	photosystem II cytochrome b559 beta chain [Solenopsis bivonae]
BolSC49t61179H	0.000	0.000	0.000	0.391	0.000	0.723	0.384	0.698	0.372	photosystem II protein L [Lespedeza floribunda]
BolSC49t61180H	0.000	0.000	0.000	0.000	0.000	0.000	0.000	0.000	0.000	PsbJ [Heracleum candicans]
BolSC49t61181H	0.000	0.000	0.000	0.000	0.000	0.000	0.000	0.000	0.000	cytochrome f [Lunaria rediviva]
BolSC49t61182H	0.000	0.000	0.000	0.000	0.000	0.099	0.105	0.000	0.000	ycf10/cemA [Bunias orientalis]
BolSC49t61183H	0.152	0.092	0.000	0.000	0.000	0.229	0.162	0.074	0.000	photosystem I assembly protein Ycf4 [Thlaspi arvense]
BolSC49t61184H	0.000	0.000	0.000	0.000	0.000	0.000	0.000	0.000	0.000	photosystem I subunit VIII [Chorispora tenella]
BolSC49t61185H	0.000	0.000	0.000	0.000	0.000	0.000	0.000	0.000	0.000	carboxyltransferase beta subunit, partial [Brassica napus]
BolSC49t61186H	0.000	0.000	0.000	0.000	0.000	0.000	0.000	0.000	0.000	ribulose-1,5-bisphosphate carboxylase/oxygenase large subunit [Brassica juncea subsp. integrifolia]
BolSC49t61187H	0.000	0.000	0.000	0.000	0.000	0.000	0.000	0.000	0.000	unnamed protein product [Brassica oleracea]
BolSC49t61188H	0.000	0.000	0.000	0.000	0.000	0.000	0.000	0.000	0.000	photosystem II G protein [Bunias erucago]
BolSC49t61189H	0.069	0.000	0.000	0.075	0.000	0.069	0.073	0.000	0.000	ribosomal protein S4 [Sinalliaria limprichtiana]
BolSC49t61190H	0.000	0.000	0.000	0.000	0.000	0.000	0.000	0.000	0.000	hypothetical chloroplast RF34 [Plagiobothrys nothofulvus]
BolSC49t61191H	0.000	0.000	0.000	0.000	0.000	0.000	0.000	0.000	0.000	photosystem I assembly protein Ycf3 [Eutrema tenue]
BolSC49t61192H	0.053	0.000	0.000	0.000	0.000	0.106	0.113	0.051	0.000	photosystem I P700 apoprotein A1 [Nitraria tangutorum]
BolSC49t61193H	0.078	0.000	0.000	0.000	0.171	0.236	0.000	0.000	0.081	Photosystem I P700 chlorophyll a apoprotein A2 [Artemisia annua]
BolSC49t61194H	0.000	0.000	0.000	0.000	0.260	0.000	0.000	0.000	0.000	photosystem II protein Z [Santalum boninense]
BolSC49t61195H	0.000	0.000	0.000	0.000	0.000	0.078	0.000	0.038	0.000	PSII D2 protein [Firmiana major]
BolSC49t61196H	0.072	0.132	0.123	0.039	0.040	0.145	0.000	0.035	0.000	RNA polymerase beta subunit [Crambe hispanica subsp. abyssinica]
BolSC49t61197H	0.000	0.000	0.000	0.000	0.000	0.000	0.000	0.000	0.000	RNA polymerase beta [Prunus davidiana]
BolSC49t61198H	0.000	0.000	0.160	0.000	0.000	0.000	0.000	0.000	0.000	RNA polymerase beta' subunit [Cyclocarya paliurus]
BolSC49t61199H	0.105	0.000	0.000	0.114	0.000	0.105	0.000	0.000	0.000	ribosomal protein S2 [Farsetia stylosa]
BolSC49t61200H	0.000	0.000	0.000	0.000	0.000	0.000	0.000	0.000	0.000	ATP synthase subunit c, chloroplastic [Capsicum annuum]
BolSC49t61201H	0.105	0.127	0.119	0.000	0.000	0.210	0.112	0.000	0.000	ATP synthase CF0 B subunit [Arabidopsis lyrata subsp. lyrata]
BolSC49t61202H	0.000	0.000	0.000	0.000	0.000	0.148	0.000	0.000	0.000	ATPase alpha subunit [Ricotia aucheri]
BolSC49t61203H	0.000	0.000	0.000	0.000	0.000	0.000	0.000	0.000	0.000	photosystem II protein I [Bertholletia excelsa]
BolSC49t61204H	0.000	0.000	0.000	0.000	0.000	0.000	0.000	0.000	0.000	photosystem II protein K [Orychophragmus taibaiensis]
BolSC49t61205H	0.000	0.000	0.000	0.000	0.000	0.000	0.000	0.000	0.000	ribosomal protein S16 [Farsetia stylosa]
BolSC49t61206H	0.000	0.000	0.127	0.000	0.122	0.448	0.119	0.108	0.000	maturase K [Brassica napus]
BolSC49t61207H	0.000	0.000	0.000	0.055	0.000	0.000	0.109	0.000	0.000	PsbA [Senna siamea]
BolSC49t61208H	0.000	0.000	0.000	0.000	0.000	0.000	0.000	0.000	0.000	ribosomal protein L2 [Brassica carinata]
BolSC49t61209H	0.000	0.000	0.000	0.000	0.000	0.000	0.000	0.000	0.000	ribosomal protein L23 [Chaenomeles speciosa]
BolSC49t61210H	0.000	0.000	0.000	0.000	0.000	0.000	0.000	0.000	0.000	Ycf2 [Brassica juncea subsp. integrifolia]
BolSC49t61211H	0.000	0.000	0.000	0.000	0.000	0.000	0.000	0.000	0.000	ycf2 [Brassica napus]
BolSC49t61212H	0.000	0.000	0.000	0.000	0.000	0.000	0.000	0.000	0.000	ycf2 [Brassica napus]
BolSC49t61213H	0.000	0.000	0.000	0.000	0.000	0.000	0.000	0.000	0.000	ORF77 [Isatis tinctoria]
BolSC49t61214H	0.000	0.000	0.000	0.000	0.000	0.000	0.000	0.000	0.000	hypothetical protein ARALYDRAFT_894061 [Arabidopsis lyrata subsp. lyrata]
BolSC49t61215H	0.111	0.034	0.000	0.000	0.000	0.084	0.119	0.027	0.058	NADH-plastoquinone oxidoreductase subunit 2 [Mesembryanthemum crystallinum]
BolSC49t61216H	0.000	0.000	0.358	0.343	0.000	0.000	0.000	0.000	0.000	ribosomal protein S7 [Panax quinquefolius]
BolSC55t61217H	0.246	0.997	0.653	0.000	0.000	0.000	0.000	0.000	0.000	probable glutathione peroxidase 4 [Brassica napus]
BolSC55t61218H	1.508	0.096	0.180	3.277	0.087	0.478	0.931	0.000	0.655	PREDICTED: uncharacterized protein LOC108812485 [Raphanus sativus]
BolSC55t61219H	0.065	0.079	0.591	0.565	1.348	1.697	0.208	0.441	0.403	PREDICTED: protein PALE CRESS, chloroplastic [Raphanus sativus]
BolSC55t61220H	0.702	0.853	0.532	0.000	0.000	0.000	0.250	0.000	0.000	uncharacterized protein LOC106434848 [Brassica napus]
BolSC55t61221H	0.530	0.107	0.100	0.096	0.096	0.266	0.000	0.000	0.274	PREDICTED: uncharacterized protein LOC106322112, partial [Brassica oleracea var. oleracea]
BolSC55t61222H	0.936	0.778	1.119	1.392	1.721	2.473	0.789	1.433	1.068	PREDICTED: protein PALE CRESS, chloroplastic-like [Brassica oleracea var. oleracea]
BolSC55t61223H	0.061	0.222	0.069	0.332	0.333	1.103	0.130	0.237	0.252	PREDICTED: protein PALE CRESS, chloroplastic-like [Brassica oleracea var. oleracea]
BolSC55t61224H	0.000	0.474	0.000	0.424	0.000	2.350	0.416	0.000	0.000	unnamed protein product [Brassica oleracea]
BolSC55t61225H	0.238	0.433	0.438	0.097	0.032	0.179	0.095	0.086	0.000	uncharacterized protein LOC106434848 [Brassica napus]
BolSC55t61226H	3.131	2.481	2.519	2.835	4.034	6.852	2.367	2.781	3.097	protein PALE CRESS, chloroplastic isoform X1 [Brassica napus]
BolSC55t61227H	0.232	0.141	0.132	0.126	0.253	0.000	0.000	0.000	0.000	PREDICTED: mediator of RNA polymerase II transcription subunit 33B-like [Brassica oleracea var. oleracea]
BolSC55t61228H	5.032	4.679	4.160	3.634	2.850	3.708	3.297	5.401	3.518	PREDICTED: mediator of RNA polymerase II transcription subunit 33B [Raphanus sativus]
BolSC55t61229H	13.698	15.748	14.809	10.741	10.332	9.085	14.174	13.777	13.246	RNA exonuclease 4 [Brassica napus]
BolSC55t61230H	0.000	0.000	0.000	1.570	1.577	0.644	4.111	7.932	9.694	hypothetical protein F2Q70_00024180 [Brassica cretica]
BolSC55t61231H	0.898	0.800	0.884	1.985	1.307	0.962	0.032	0.029	0.062	PREDICTED: uncharacterized protein LOC106340264 isoform X1 [Brassica oleracea var. oleracea]
BolSC55t61232H	15.056	18.932	13.113	45.467	63.194	66.903	33.597	32.870	34.283	predicted protein [Arabidopsis lyrata subsp. lyrata]
BolSC55t61233H	3.677	3.973	3.934	5.463	5.117	4.949	6.450	6.886	4.887	PREDICTED: piezo-type mechanosensitive ion channel homolog isoform X1 [Brassica rapa]
BolSC55t61234H	4.077	5.580	7.388	12.555	9.818	6.042	8.806	10.599	16.604	hypothetical protein F2Q70_00024176 [Brassica cretica]
BolSC55t61235H	0.000	0.000	0.000	0.000	0.000	0.000	0.000	0.000	0.000	BnaAnng25520D [Brassica napus]
BolSC56t61236H	0.000	0.000	0.000	0.000	0.000	0.000	0.000	0.000	0.000	NdhG [Brassica napus var. napus]
BolSC56t61237H	0.000	0.000	0.000	0.000	0.000	0.000	0.000	0.000	0.000	unnamed protein product [Brassica oleracea]
BolSC56t61238H	0.000	0.000	0.000	0.000	0.000	0.000	0.000	0.000	0.000	NADH dehydrogenase subunit 2 [Camelina sativa]
BolSC56t61239H	0.000	0.000	0.000	0.000	0.000	0.000	0.000	0.000	0.000	NAD(P)H-quinone oxidoreductase subunit 2 B, chloroplastic [Ananas comosus]
BolSC56t61240H	0.000	0.000	0.000	0.000	0.000	0.000	0.000	0.000	0.000	unnamed protein product [Brassica oleracea]
BolSC56t61241H	0.000	0.000	0.000	0.000	0.000	0.000	0.000	0.000	0.000	ycf2 [Brassica napus]
BolSC56t61242H	0.000	0.000	0.000	0.000	0.000	0.000	0.000	0.000	0.000	ribosomal protein L23 [Aethionema cordifolium]
BolSC56t61243H	0.000	0.000	0.000	0.000	0.000	0.000	0.000	0.000	0.000	ribosomal protein L2 [Ricotia lunaria]
BolSC56t61244H	0.000	0.000	0.000	0.000	0.000	0.000	0.000	0.000	0.000	ribosomal protein S19 [Orychophragmus taibaiensis]
BolSC56t61245H	0.000	0.156	0.000	0.070	0.070	0.064	0.068	0.062	0.000	ribosomal protein S3 [Ionopsidium acaule]
BolSC56t61246H	0.000	0.000	0.000	0.000	0.000	0.191	0.000	0.000	0.000	ribosomal protein L16 [Raphanus sativus var. raphanistroides]
BolSC56t61247H	0.000	0.000	0.000	0.000	0.000	0.336	0.000	0.000	0.000	unnamed protein product [Brassica oleracea]
BolSC56t61248H	0.000	0.000	0.000	0.000	0.000	0.000	0.000	0.000	0.000	ribosomal protein S8 [Aethionema cordifolium]
BolSC56t61249H	0.000	0.000	0.000	0.000	0.000	0.000	0.000	0.000	0.000	cytochrome b6 [Iochroma lehmannii]
BolSC57t61250H	0.000	0.000	0.000	0.000	0.000	0.000	0.000	0.000	0.000	unnamed protein product [Brassica oleracea]
BolSC57t61251H	0.000	0.000	0.000	0.000	0.000	0.000	0.000	0.000	0.000	unnamed protein product [Brassica oleracea]
BolSC66t61252H	0.000	0.000	0.000	0.000	0.000	0.000	0.000	0.000	0.000	unnamed protein product [Brassica oleracea]
BolSC66t61253H	0.502	0.812	0.950	189.399	174.991	153.058	160.707	242.321	157.192	tonoplast intrinsic protein [Sinapis arvensis]
BolSC66t61254H	8.942	1.592	1.117	2.544	3.474	2.256	1.849	1.542	0.918	PREDICTED: probable xyloglucan endotransglucosylase/hydrolase protein 32 isoform X1 [Brassica oleracea var. oleracea]
BolSC66t61255H	0.000	0.000	0.000	0.000	0.000	0.000	0.000	0.000	0.000	unnamed protein product, partial [Brassica oleracea]
BolSC73t61256H	0.000	0.000	0.000	0.000	0.000	0.000	0.000	0.000	0.000	unnamed protein product [Brassica oleracea]
BolSC74t61257H	0.000	0.000	0.000	0.000	0.000	0.000	0.000	0.000	0.000	hypothetical protein TSUD_50420 [Trifolium subterraneum]
BolSC81t61258H	0.083	0.000	0.000	3.412	3.156	0.829	1.146	0.560	1.365	PREDICTED: protein DETOXIFICATION 28-like [Raphanus sativus]
BolSC81t61259H	1.797	2.493	1.624	2.152	1.841	1.546	0.665	0.924	1.174	F-box/kelch-repeat protein At5g51250-like [Brassica napus]
BolSC81t61260H	1.663	2.917	3.148	1.741	1.345	1.608	0.986	1.671	0.954	117M18_27 [Brassica rapa]
BolSC81t61261H	6.393	5.657	6.875	3.031	3.637	3.482	9.000	6.821	6.881	PREDICTED: mechanosensitive ion channel protein 2, chloroplastic-like [Brassica oleracea var. oleracea]
BolSC83t61262H	0.000	0.000	0.000	0.000	0.000	0.192	0.000	0.000	0.000	PREDICTED: LOW QUALITY PROTEIN: probable ribosomal protein S11, mitochondrial [Brassica oleracea var. oleracea]
BolSC84t61263H	0.000	0.000	0.000	0.000	0.000	0.000	0.000	0.000	0.000	unnamed protein product [Brassica oleracea]
BolSC84t61264H	0.000	0.000	0.000	0.000	0.000	0.000	0.000	0.000	0.000	PREDICTED: glutathione S-transferase T2-like [Brassica rapa]
BolSC85t61265H	0.000	0.000	0.000	0.136	0.684	0.000	0.000	0.486	0.000	heat shock protein -related [Brassica oleracea]
BolSC90t61266H	0.000	0.000	0.000	0.000	0.000	0.000	0.000	0.000	0.000	PREDICTED: cytochrome P450 704C1-like [Brassica oleracea var. oleracea]
BolSC91t61267H	0.000	0.000	0.000	0.000	0.000	0.000	0.000	0.000	0.000	hypothetical protein E3N88_08116 [Mikania micrantha]
BolSC91t61268H	0.000	0.000	0.000	0.000	0.000	0.000	0.000	0.000	0.000	unnamed protein product [Brassica oleracea]
BolSC91t61269H	0.000	0.000	0.000	0.000	0.000	0.000	0.000	0.000	0.000	ribosomal protein L23 [Chaenomeles speciosa]
BolSC91t61270H	0.000	0.000	0.000	0.000	0.000	0.000	0.000	0.000	0.000	unnamed protein product [Brassica oleracea]
BolSC94t61271H	3.719	4.516	4.540	3.016	3.090	3.176	3.140	2.905	1.891	protein argonaute 6-like isoform X2 [Brassica napus]
BolSC94t61272H	0.000	0.000	0.000	0.000	0.000	0.000	0.000	0.000	0.000	unnamed protein product [Brassica oleracea]
BolSC94t61273H	1.340	0.840	0.540	0.094	0.047	0.000	0.000	0.000	0.535	PREDICTED: cytochrome P450 71B11-like [Raphanus sativus]
BolSC94t61274H	3.692	2.046	2.370	2.704	2.014	1.128	1.028	0.622	1.988	PREDICTED: E3 ubiquitin-protein ligase COP1 isoform X2 [Raphanus sativus]
BolSC94t61275H	3.620	3.895	3.799	2.664	1.900	2.093	1.614	1.931	1.396	protein argonaute 6-like isoform X2 [Brassica napus]
BolSC97t61276H	0.000	0.000	0.000	0.000	0.000	0.000	0.000	0.000	0.000	WASH complex subunit 3-like [Brassica napus]
BolSC97t61277H	0.000	0.000	0.000	0.000	0.000	0.000	0.000	0.000	0.000	uncharacterized protein LOC106345255 [Brassica napus]
BolSC99t61278H	121.945	137.795	112.238	205.228	199.691	208.801	171.552	176.702	171.256	PREDICTED: succinate dehydrogenase subunit 5, mitochondrial isoform X2 [Brassica rapa]
BolSC99t61279H	1.593	1.143	2.220	5.586	6.242	4.796	6.026	7.787	5.755	hypothetical protein BRARA_J00538 [Brassica rapa]
BolC1t00001H	0.000	0.000	0.000	0.000	0.000	0.000	0.000	0.000	0.000	putative cyclic nucleotide-gated ion channel 10 [Hibiscus syriacus]
BolC1t00002H	0.093	0.113	0.106	0.000	0.152	0.187	0.000	0.000	0.192	PREDICTED: LOW QUALITY PROTEIN: amino acid transporter ANTL2 [Brassica rapa]
BolC1t00003H	0.648	0.262	0.245	0.000	0.118	0.325	0.000	0.000	0.223	PREDICTED: LOW QUALITY PROTEIN: amino acid transporter ANTL2 [Brassica rapa]
BolC1t00004H	7.696	6.608	6.056	9.110	8.459	7.863	11.586	11.665	12.229	protein LAZ1-like [Brassica napus]
BolC1t00005H	31.971	43.610	31.688	156.167	162.439	189.572	117.952	120.037	114.562	PREDICTED: aminoacylase-1B-like isoform X1 [Brassica rapa]
BolC1t00006H	92.161	66.825	53.296	38.928	30.893	42.620	55.654	47.052	34.731	PREDICTED: expansin-A20 [Raphanus sativus]
BolC1t00007H	0.000	0.046	0.000	0.179	0.276	0.343	0.769	0.514	0.365	cellulose synthase-like protein D4 [Brassica napus]
BolC1t00008H	0.000	0.000	0.000	0.000	0.000	0.000	0.000	0.000	0.000	transducin family protein [Arabidopsis lyrata subsp. lyrata]
BolC1t00009H	0.000	0.000	0.000	0.000	0.000	0.000	0.000	0.000	0.000	Putative endonuclease or glycosyl hydrolase [Arabidopsis thaliana]
BolC1t00010H	0.000	0.000	0.000	0.000	0.000	0.000	0.000	0.000	0.000	Zn and Cd transporter [Noccaea caerulescens]
BolC1t00011H	0.000	0.000	0.000	0.000	0.000	0.000	0.000	0.000	0.000	PREDICTED: tRNA (guanine-N(7)-)-methyltransferase non-catalytic subunit wdr4 [Camelina sativa]
BolC1t00012H	1.665	1.579	3.190	4.636	3.917	2.193	10.991	7.006	12.405	expansin-like A2 [Brassica napus]
BolC1t00013H	2.858	3.560	2.827	10.149	10.218	10.882	14.752	18.814	29.609	serine/threonine-protein kinase STY46-like isoform X3 [Brassica napus]
BolC1t00014H	29.260	28.304	30.352	12.614	12.879	15.468	8.015	7.561	5.739	PREDICTED: chromatin-remodeling complex subunit ies6-like [Brassica rapa]
BolC1t00015H	5.822	5.271	2.784	8.659	7.692	8.202	11.228	11.679	10.703	PREDICTED: thaumatin-like protein 1b [Raphanus sativus]
BolC1t00016H	0.000	0.000	0.000	0.236	0.000	0.000	0.000	0.000	0.000	dirigent protein 15 [Eutrema salsugineum]
BolC1t00017H	0.338	0.308	0.288	14.160	14.958	12.526	3.070	3.238	2.140	proline-rich protein 4-like [Brassica napus]
BolC1t00018H	0.190	0.230	0.108	10.004	9.010	6.858	7.798	8.184	10.581	auxin-induced protein X15, partial [Brassica napus]
BolC1t00019H	0.309	0.375	0.175	18.953	14.485	11.619	13.671	14.058	17.527	auxin-induced protein X15, partial [Brassica napus]
BolC1t00020H	1.457	0.161	0.451	34.127	36.295	27.663	25.169	42.369	43.225	PREDICTED: auxin-induced protein 15A [Raphanus sativus]
BolC1t00021H	0.000	0.096	0.060	0.000	0.000	0.000	0.000	0.000	0.000	ATASE3 [Arabidopsis thaliana]
BolC1t00022H	31.646	42.769	38.598	8.504	7.342	7.528	1.583	2.226	2.140	dihydrouridine synthase family protein [Arabidopsis lyrata subsp. lyrata]
BolC1t00023H	14.541	13.980	11.668	11.003	12.511	10.710	20.814	21.111	24.541	protein BASIC PENTACYSTEINE5-like [Brassica napus]
BolC1t00024H	59.511	62.625	51.460	72.954	73.434	63.001	28.791	30.909	26.951	PREDICTED: V-type proton ATPase subunit c1-like [Brassica oleracea var. oleracea]
BolC1t00025H	0.051	0.062	0.039	4.366	1.635	0.803	0.654	0.429	1.916	kinesin-like protein KIN-7F [Brassica napus]
BolC1t00026H	13.634	22.918	16.808	163.169	223.074	368.254	770.908	802.549	900.661	PREDICTED: probable fructose-bisphosphate aldolase 2, chloroplastic [Brassica oleracea var. oleracea]
BolC1t00027H	0.160	0.388	0.272	2.081	3.222	4.806	37.641	16.702	15.323	PREDICTED: ADP,ATP carrier protein ER-ANT1 [Brassica oleracea var. oleracea]
BolC1t00028H	0.085	0.069	0.032	0.000	0.062	0.000	0.000	0.000	0.000	endoglucanase 23-like isoform X2 [Brassica napus]
BolC1t00029H	0.000	0.000	0.000	0.000	0.000	0.000	0.000	0.000	0.000	BnaC01g00100D [Brassica napus]
BolC1t00030H	1.787	2.687	2.804	2.806	1.765	1.310	0.242	0.275	0.264	endoglucanase 24 [Brassica napus]
BolC1t00031H	16.745	15.242	22.876	5.954	3.537	2.272	0.851	2.567	1.939	PREDICTED: protein DETOXIFICATION 47, chloroplastic [Raphanus sativus]
BolC1t00032H	0.000	0.000	0.000	0.000	0.000	0.000	0.000	0.000	0.000	kinesin-like protein KIN-7D, mitochondrial [Brassica napus]
BolC1t00033H	0.000	0.000	0.000	0.000	0.000	0.000	0.000	0.000	0.000	kinesin-related protein [Arabidopsis thaliana]
BolC1t00034H	0.000	0.000	0.000	0.000	0.000	0.000	0.000	0.000	0.000	kinesin-related protein [Arabidopsis thaliana]
BolC1t00035H	0.176	0.071	0.465	0.954	2.108	4.582	2.311	3.459	4.773	PREDICTED: B-box zinc finger protein 20 [Camelina sativa]
BolC1t00036H	36.094	34.444	34.302	54.898	48.895	40.584	29.173	37.100	35.742	PREDICTED: LOW QUALITY PROTEIN: V-type proton ATPase subunit a3-like [Brassica rapa]
BolC1t00037H	0.000	0.000	0.000	0.000	0.000	0.000	0.000	0.000	0.000	BnaC01g00160D [Brassica napus]
BolC1t00038H	9.732	7.971	8.019	11.074	10.704	9.194	11.648	11.316	11.978	cysteine protease RD19A-like [Brassica napus]
BolC1t00039H	0.000	0.000	0.000	0.000	0.137	0.126	0.000	0.000	0.000	hypothetical protein EUTSA_v10027119mg [Eutrema salsugineum]
BolC1t00040H	0.081	0.020	0.037	0.053	0.088	0.113	0.034	0.047	0.050	PREDICTED: probable receptor-like protein kinase At4g39110 [Brassica oleracea var. oleracea]
BolC1t00041H	0.000	0.000	0.000	0.000	0.000	0.000	0.000	0.000	0.000	PREDICTED: LOW QUALITY PROTEIN: bifunctional phosphatase IMPL2, chloroplastic-like [Raphanus sativus]
BolC1t00042H	0.749	0.114	0.319	2.747	0.409	6.955	0.000	0.000	3.577	putative protein [Arabidopsis thaliana]
BolC1t00043H	6.805	5.833	4.168	3.879	4.333	4.018	3.667	4.720	6.647	hypothetical protein F2Q70_00033700 [Brassica cretica]
BolC1t00044H	53.980	51.703	42.815	77.644	82.903	77.761	78.460	81.577	84.475	PREDICTED: chaperone protein dnaJ 10 [Raphanus sativus]
BolC1t00045H	218.515	204.521	238.504	73.475	57.294	59.598	17.883	21.869	23.699	40S ribosomal protein S25-4-like [Brassica napus]
BolC1t00046H	0.146	1.599	3.157	1.113	0.798	0.441	0.156	0.000	0.000	DNA binding protein [Arabidopsis lyrata subsp. lyrata]
BolC1t00047H	2300.753	2463.811	2177.045	1167.890	1193.148	1133.739	550.229	627.482	609.614	glycine-rich RNA-binding protein 10-like isoform X1 [Brassica napus]
BolC1t00048H	20.556	28.215	29.293	8.048	3.762	4.614	0.681	1.608	1.450	uncharacterized protein LOC106395048 isoform X1 [Brassica napus]
BolC1t00049H	0.065	0.553	0.369	1.131	0.781	0.392	0.694	1.764	0.806	unnamed protein product [Brassica rapa]
BolC1t00050H	0.000	0.000	0.000	0.000	0.000	0.107	0.000	0.000	0.000	egg cell-secreted protein 1.4-like [Brassica napus]
BolC1t00051H	59.657	54.570	44.575	46.018	31.300	19.223	4.763	9.298	7.656	PREDICTED: cellulose synthase A catalytic subunit 2 [UDP-forming] isoform X1 [Camelina sativa]
BolC1t00052H	0.343	0.277	0.000	1.117	1.122	0.344	6.702	3.098	4.008	uncharacterized protein LOC106373756 [Brassica napus]
BolC1t00053H	35.171	28.231	29.714	16.161	14.984	9.754	10.076	8.005	7.189	UDP-rhamnose/UDP-galactose transporter 4-like [Brassica napus]
BolC1t00054H	5.500	8.234	11.854	7.945	7.529	4.872	7.739	6.674	8.129	PREDICTED: protein BRASSINOSTEROID INSENSITIVE 1 [Raphanus sativus]
BolC1t00055H	0.000	0.000	0.053	0.305	0.102	0.141	0.050	0.318	0.097	probable WRKY transcription factor 13 isoform X2 [Brassica napus]
BolC1t00056H	5.422	5.764	5.239	6.403	6.049	5.236	5.600	6.566	5.598	uncharacterized protein LOC106439025 isoform X2 [Brassica napus]
BolC1t00057H	0.029	0.286	0.267	6.825	5.778	5.787	1.852	5.672	5.693	alkane hydroxylase MAH1-like [Brassica napus]
BolC1t00058H	53.521	62.820	54.710	28.382	28.335	27.242	17.702	19.127	17.713	PREDICTED: developmentally-regulated G-protein 3-like [Raphanus sativus]
BolC1t00059H	8.956	8.304	5.595	23.669	27.901	38.615	20.766	26.035	19.375	shikimate kinase 2, chloroplastic-like isoform X1 [Brassica napus]
BolC1t00060H	1.771	1.828	1.509	1.694	1.894	1.724	1.399	1.287	1.024	PREDICTED: F-box/kelch-repeat protein At4g39550-like [Brassica oleracea var. oleracea]
BolC1t00061H	0.218	0.309	0.331	0.119	0.119	0.183	0.039	0.176	0.188	PREDICTED: F-box/kelch-repeat protein At4g39550-like [Brassica oleracea var. oleracea]
BolC1t00062H	0.620	0.752	0.000	0.561	0.676	0.311	1.543	0.300	1.279	PREDICTED: F-box/kelch-repeat protein At4g39590-like [Raphanus sativus]
BolC1t00063H	2.745	2.943	2.510	1.782	2.256	1.109	1.141	1.347	1.840	F-box/kelch-repeat protein At4g39550-like [Brassica napus]
BolC1t00064H	0.000	0.000	0.000	0.000	0.000	0.000	0.000	0.000	0.035	F-box/kelch-repeat protein At4g39590-like [Brassica napus]
BolC1t00065H	0.000	0.000	0.000	0.019	0.000	0.000	0.000	0.000	0.000	PREDICTED: putative F-box/kelch-repeat protein At1g61540 isoform X2 [Brassica rapa]
BolC1t00066H	0.000	0.000	0.000	0.000	0.000	0.000	0.000	0.000	0.000	unnamed protein product [Brassica rapa]
BolC1t00067H	48.524	43.652	52.907	32.388	31.182	23.430	12.744	16.204	14.072	PREDICTED: coatomer subunit alpha-2 [Raphanus sativus]
BolC1t00068H	0.000	0.000	0.000	0.000	0.000	0.000	0.000	0.000	0.000	BnaC01g00500D [Brassica napus]
BolC1t00069H	7.373	11.937	5.982	9.921	12.645	16.917	2.623	4.423	11.600	unnamed protein product [Brassica oleracea]
BolC1t00070H	5.848	3.506	7.448	6.728	5.474	2.333	3.368	3.794	4.875	PREDICTED: gamma-glutamyltranspeptidase 1 isoform X1 [Brassica oleracea var. oleracea]
BolC1t00071H	17.283	21.880	15.985	52.478	46.561	43.031	28.657	35.008	41.826	PREDICTED: alanine--glyoxylate aminotransferase 2 homolog 1, mitochondrial [Brassica oleracea var. oleracea]
BolC1t00072H	0.000	0.000	0.222	0.212	1.703	0.587	0.416	0.000	0.201	unnamed protein product [Brassica rapa]
BolC1t00073H	8.622	8.414	9.853	16.298	13.798	17.204	17.585	18.018	15.564	apoptotic chromatin condensation inducer in the nucleus-like [Brassica napus]
BolC1t00074H	0.125	0.152	0.427	0.136	0.000	0.000	0.134	0.000	0.000	PREDICTED: MICOS complex subunit MIC60 [Camelina sativa]
BolC1t00075H	0.000	0.000	0.000	1.056	0.289	0.177	3.488	1.712	6.748	heavy metal-associated isoprenylated plant protein 23-like [Brassica napus]
BolC1t00076H	0.245	1.787	0.348	46.323	81.792	149.778	81.290	96.335	102.319	PREDICTED: photosynthetic NDH subunit of lumenal location 4, chloroplastic [Brassica oleracea var. oleracea]
BolC1t00077H	0.000	0.058	0.054	1.142	0.782	0.144	0.612	0.880	1.726	hybrid signal transduction protein dokA-like [Brassica napus]
BolC1t00078H	0.000	0.000	0.000	0.000	0.000	0.000	0.000	0.000	0.000	electron transport SCO1/SenC family protein [Arabidopsis lyrata subsp. lyrata]
BolC1t00079H	0.000	0.000	0.000	0.000	0.000	0.000	0.000	0.000	0.000	F-box/kelch-repeat protein At4g39753-like [Brassica napus]
BolC1t00080H	0.326	0.593	0.878	1.416	1.688	1.267	1.130	2.327	4.875	PREDICTED: probable trehalose-phosphate phosphatase H [Brassica oleracea var. oleracea]
BolC1t00081H	2.434	1.908	2.995	2.149	1.826	1.171	0.974	0.688	1.832	PREDICTED: ethylene-responsive transcription factor ERF060-like [Raphanus sativus]
BolC1t00082H	2.321	4.003	2.768	3.002	3.446	3.775	3.790	2.812	1.534	unnamed protein product [Brassica oleracea]
BolC1t00083H	0.000	0.000	0.000	23.482	15.799	9.543	1.960	1.256	8.588	PREDICTED: uncharacterized protein LOC108841025 [Raphanus sativus]
BolC1t00084H	0.660	1.235	1.311	8.602	4.139	2.676	172.790	26.739	32.688	PREDICTED: inositol-3-phosphate synthase [Raphanus sativus]
BolC1t00085H	1.646	0.799	1.309	0.656	0.180	0.110	0.176	0.266	0.283	PREDICTED: protein NEN4-like [Brassica rapa]
BolC1t00086H	0.370	0.000	0.000	0.000	0.403	0.371	0.394	0.358	0.000	PREDICTED: trafficking protein particle complex subunit 12 isoform X1 [Brassica oleracea var. oleracea]
BolC1t00087H	31.440	21.492	27.751	39.301	26.965	15.351	31.407	27.189	38.246	uncharacterized protein LOC106439268 [Brassica napus]
BolC1t00088H	77.505	64.308	59.993	70.201	73.335	56.960	23.618	29.051	22.555	PREDICTED: uncharacterized protein LOC103853308 [Brassica rapa]
BolC1t00089H	0.000	0.000	0.000	5.483	3.224	2.144	0.049	0.000	0.516	PREDICTED: TLD domain-containing protein 2 [Brassica oleracea var. oleracea]
BolC1t00090H	171.406	177.315	145.415	139.394	128.464	129.915	51.672	65.791	59.199	unknown [Arabidopsis thaliana]
BolC1t00091H	16.084	20.705	16.791	43.159	43.730	42.855	22.850	26.675	27.157	PREDICTED: F-box/kelch-repeat protein At4g39560-like [Camelina sativa]
BolC1t00092H	51.912	46.942	42.966	41.851	40.297	40.057	59.752	57.766	57.335	PREDICTED: ubiquitin carboxyl-terminal hydrolase 3 [Brassica oleracea var. oleracea]
BolC1t00093H	2.962	4.756	6.348	8.774	7.299	4.124	7.188	3.611	3.206	adenylyl-sulfate kinase 2 [Leavenworthia alabamica]
BolC1t00094H	7.594	17.978	16.702	95.610	83.900	51.240	39.327	28.178	16.204	cytochrome P450 79b2 [Brassica rapa subsp. pekinensis]
BolC1t00095H	2.047	1.897	2.570	0.566	0.470	0.775	0.115	0.313	0.185	PREDICTED: pentatricopeptide repeat-containing protein At4g39952, mitochondrial [Brassica oleracea var. oleracea]
BolC1t00096H	58.987	81.003	49.450	38.922	42.917	48.284	16.112	20.074	11.237	unnamed protein product, partial [Brassica oleracea]
BolC1t00097H	0.000	0.307	0.000	11.413	12.152	9.906	0.540	1.962	1.568	unnamed protein product [Brassica oleracea]
BolC1t00098H	72.040	59.818	84.408	80.501	69.004	63.439	27.314	35.705	46.661	2-dehydro-3-deoxyphosphoheptonate aldolase [Arabidopsis thaliana]
BolC1t00099H	62.344	52.719	51.259	47.465	43.460	27.593	8.591	21.244	12.112	ras-related protein RABA4b [Brassica napus]
BolC1t00100H	2.809	1.014	0.517	1.898	0.580	0.152	0.081	0.368	0.392	ras-related protein RABA4b [Brassica napus]
BolC1t00101H	0.000	0.000	0.876	0.000	0.000	0.000	0.000	0.000	2.390	PREDICTED: probable Xaa-Pro aminopeptidase P isoform X3 [Raphanus sativus]
BolC1t00102H	26.126	22.005	25.994	3.293	2.870	2.181	0.630	1.366	0.964	tRNA (cytosine(34)-C(5))-methyltransferase [Brassica napus]
BolC1t00103H	1.937	6.125	4.355	8.202	6.871	4.132	3.747	4.576	13.666	PREDICTED: serine/threonine-protein kinase SRK2F [Camelina sativa]
BolC1t00104H	0.000	0.029	0.027	0.052	0.000	0.000	0.025	0.093	0.025	WEB family protein At5g16730, chloroplastic-like, partial [Brassica napus]
BolC1t00105H	882.452	726.192	822.149	795.145	784.172	779.375	879.384	861.656	797.150	histone H3.3 isoform X1 [Cucurbita pepo subsp. pepo]
BolC1t00106H	133.882	87.120	101.778	124.762	132.951	131.474	69.891	79.141	58.786	probable signal peptidase complex subunit 1 [Brassica napus]
BolC1t00107H	8.976	10.770	6.836	9.181	10.026	12.614	11.044	13.814	12.101	unnamed protein product [Brassica rapa]
BolC1t00108H	17.046	15.829	16.212	13.446	12.627	10.993	11.223	14.631	12.063	protein SCAI-like [Brassica napus]
BolC1t00109H	0.000	0.000	0.000	0.000	0.000	0.000	0.000	0.000	0.000	PREDICTED: F-box/kelch-repeat protein At4g39560-like [Camelina sativa]
BolC1t00110H	26.860	26.642	24.115	204.180	179.649	134.519	154.475	121.475	127.224	PREDICTED: homeobox-leucine zipper protein ATHB-16 isoform X1 [Raphanus sativus]
BolC1t00111H	0.883	0.559	1.090	1.293	1.089	0.732	2.089	3.718	3.526	PREDICTED: putative clathrin assembly protein At4g40080 isoform X2 [Raphanus sativus]
BolC1t00112H	0.000	0.118	0.000	67.413	33.423	9.105	0.833	3.308	2.920	classical arabinogalactan protein 3-like [Brassica napus]
BolC1t00113H	1.467	1.273	1.309	6.379	5.605	7.154	37.359	19.703	27.159	PREDICTED: uncharacterized protein LOC103855772 [Brassica rapa]
BolC1t00114H	5.542	5.029	4.454	3.218	2.948	2.410	1.345	2.326	2.003	nucleobase-ascorbate transporter 11-like [Brassica napus]
BolC1t00115H	18.794	16.188	16.607	14.858	11.588	10.045	9.341	11.637	10.542	probable glycosyltransferase At5g03795 [Brassica napus]
BolC1t00116H	0.000	0.026	0.000	0.000	0.000	0.000	0.068	0.020	0.348	PREDICTED: rhamnogalacturonate lyase [Brassica oleracea var. oleracea]
BolC1t00117H	3.983	6.233	5.084	10.979	17.344	21.600	14.638	11.381	10.641	tRNA/rRNA methyltransferase family protein [Arabidopsis lyrata subsp. lyrata]
BolC1t00118H	0.173	0.000	0.066	0.314	0.126	0.290	0.678	0.392	0.716	Dof-type zinc finger domain-containing protein [Arabidopsis lyrata subsp. lyrata]
BolC1t00119H	13.142	16.529	13.679	12.663	11.560	9.096	10.006	14.370	8.222	PREDICTED: cinnamyl alcohol dehydrogenase 7-like [Brassica rapa]
BolC1t00120H	0.077	0.000	0.000	1.177	0.760	0.233	0.124	0.075	1.957	PREDICTED: probable cinnamyl alcohol dehydrogenase 6 [Brassica oleracea var. oleracea]
BolC1t00121H	0.000	0.000	0.000	0.000	0.000	0.000	0.000	0.000	0.000	hypothetical protein F2Q68_00028628 [Brassica cretica]
BolC1t00122H	0.246	0.075	0.070	3.146	0.941	1.175	0.329	0.060	1.526	agamous-like MADS-box protein AGL21 [Brassica napus]
BolC1t00123H	0.054	0.362	0.092	58.578	112.265	195.977	218.661	232.304	220.346	PREDICTED: serine hydroxymethyltransferase 1, mitochondrial-like [Brassica rapa]
BolC1t00124H	31.422	41.258	25.839	26.060	37.507	42.487	17.095	20.884	19.076	unnamed protein product [Brassica oleracea]
BolC1t00125H	151.994	170.310	184.435	43.408	32.383	22.226	8.296	9.420	7.208	heat shock 70 kDa protein 9, mitochondrial-like [Brassica napus]
BolC1t00126H	50.516	44.642	34.200	31.246	33.986	28.601	38.177	38.940	48.395	protein binding protein [Arabidopsis lyrata subsp. lyrata]
BolC1t00127H	0.000	0.000	0.000	0.000	0.000	0.000	0.000	0.000	0.000	unnamed protein product [Brassica oleracea]
BolC1t00128H	1306.846	1741.869	1146.908	1463.747	1649.091	1968.350	1179.711	795.407	475.683	phosphoenolpyruvate carboxykinase [Leavenworthia alabamica]
BolC1t00129H	0.077	0.186	0.131	0.167	0.335	0.501	0.164	0.112	0.158	PREDICTED: chromatin assembly factor 1 subunit A-A [Raphanus sativus]
BolC1t00130H	0.000	0.426	0.399	0.382	0.000	0.705	0.375	0.000	0.000	unnamed protein product [Brassica oleracea]
BolC1t00131H	0.000	0.000	0.000	0.585	0.045	0.042	0.309	0.321	0.342	Unknown [Brassica napus]
BolC1t00132H	0.000	0.000	0.000	0.000	0.000	0.000	0.000	0.000	0.000	uncharacterized protein LOC106363423 [Brassica napus]
BolC1t00133H	0.000	0.000	0.000	0.000	0.031	0.000	0.000	0.000	0.000	probable hexokinase-like 2 protein [Brassica napus]
BolC1t00134H	19.362	16.556	17.500	8.002	5.952	2.737	2.037	3.700	1.971	PREDICTED: cytochrome c oxidase subunit 6a, mitochondrial-like [Raphanus sativus]
BolC1t00135H	0.000	0.000	0.000	0.000	0.000	0.000	0.000	0.000	0.000	unnamed protein product, partial [Brassica oleracea]
BolC1t00136H	0.000	0.139	0.259	0.620	0.872	0.000	0.244	0.775	0.236	PREDICTED: EPIDERMAL PATTERNING FACTOR-like protein 2 [Raphanus sativus]
BolC1t00137H	0.000	0.000	0.000	0.188	0.000	0.174	0.000	0.000	0.537	unnamed protein product [Brassica oleracea]
BolC1t00138H	1.390	0.964	1.296	4.584	2.762	1.793	12.287	6.492	10.862	PREDICTED: homeobox-leucine zipper protein HAT22 [Camelina sativa]
BolC1t00139H	0.000	0.000	0.000	0.000	0.000	0.000	0.000	0.000	0.000	PREDICTED: cysteine protease XCP2 [Raphanus sativus]
BolC1t00140H	0.000	0.000	0.000	0.100	0.000	0.000	0.000	0.000	0.000	myb domain protein 87 [Arabidopsis thaliana]
BolC1t00141H	0.090	0.000	0.068	0.260	0.652	1.050	6.474	5.386	2.129	1-aminocyclopropane-1-carboxylate synthase 8-like [Brassica napus]
BolC1t00142H	1.304	1.056	0.802	9.211	10.377	6.381	30.411	21.243	15.144	PREDICTED: squalene epoxidase 3 [Raphanus sativus]
BolC1t00143H	0.406	0.463	0.173	2.926	3.520	3.467	2.575	5.291	3.409	AP2-like ethylene-responsive transcription factor ANT [Brassica napus]
BolC1t00144H	15.134	9.849	12.175	7.974	13.388	23.390	29.365	32.496	15.505	growth-regulating factor 2-like isoform X1 [Brassica napus]
BolC1t00145H	0.113	0.000	0.000	1.416	1.112	0.853	2.538	2.360	1.228	light-inducible protein CPRF3-like [Brassica napus]
BolC1t00146H	3.610	2.543	3.322	4.748	3.586	2.899	4.739	4.933	4.585	PREDICTED: heptahelical transmembrane protein 4 [Brassica oleracea var. oleracea]
BolC1t00147H	8.513	9.757	9.437	4.651	5.093	4.478	3.207	2.934	2.655	PREDICTED: probable amino-acid acetyltransferase NAGS2, chloroplastic [Raphanus sativus]
BolC1t00148H	46.244	34.314	33.459	24.105	26.076	25.616	11.698	15.186	12.996	PREDICTED: 50S ribosomal protein L7/L12 [Brassica oleracea var. oleracea]
BolC1t00149H	0.868	0.671	1.016	5.459	4.793	3.168	0.814	2.701	2.444	protein SHORT-ROOT-like [Brassica napus]
BolC1t00150H	0.000	0.091	0.000	6.960	2.452	1.165	3.158	3.339	14.383	PREDICTED: BTB/POZ and TAZ domain-containing protein 5-like [Raphanus sativus]
BolC1t00151H	0.000	0.000	0.000	0.642	0.455	0.454	1.707	1.886	1.866	putative N-acetyltransferase hookless1, partial [Brassica napus]
BolC1t00152H	0.031	0.450	0.245	9.460	10.713	18.590	23.289	24.586	16.634	uncharacterized protein LOC110226250 isoform X2 [Arabidopsis lyrata subsp. lyrata]
BolC1t00153H	13.735	21.420	12.888	16.982	20.775	30.840	38.149	30.974	31.015	PREDICTED: formamidase-like [Brassica oleracea var. oleracea]
BolC1t00154H	0.815	1.294	0.498	4.429	3.079	2.077	2.074	3.767	11.328	LOB domain-containing protein 39-like [Brassica napus]
BolC1t00155H	0.000	0.000	0.000	0.000	0.000	0.000	0.047	0.000	0.000	PREDICTED: peroxidase 50 [Raphanus sativus]
BolC1t00156H	7.173	3.598	6.195	62.547	37.546	21.211	8.067	13.942	20.219	PREDICTED: peroxidase 50 [Raphanus sativus]
BolC1t00157H	18.615	26.773	15.638	23.045	32.450	41.591	21.558	22.734	19.969	ribonuclease III domain-containing protein RNC1, chloroplastic-like [Brassica napus]
BolC1t00158H	0.000	0.000	0.000	0.000	0.000	0.000	0.000	0.000	0.000	PREDICTED: myb-related protein Zm1-like [Raphanus sativus]
BolC1t00159H	13.553	12.750	11.067	10.834	9.388	10.980	15.626	19.166	16.021	PREDICTED: suppressor of RPS4-RLD 1 [Brassica rapa]
BolC1t00160H	1.352	2.280	2.218	31.833	42.458	29.250	2.805	13.245	6.513	PREDICTED: lysine-rich arabinogalactan protein 18 [Brassica oleracea var. oleracea]
BolC1t00161H	6.619	6.076	7.151	2.632	1.938	2.836	3.015	4.380	4.833	PREDICTED: uncharacterized protein LOC106297438 [Brassica oleracea var. oleracea]
BolC1t00162H	4.523	3.676	4.392	2.418	3.543	2.929	6.073	5.090	4.632	DNA ligase 1-like [Brassica napus]
BolC1t00163H	0.000	0.000	0.000	0.000	0.000	0.000	0.000	0.000	0.000	agamous-like MADS-box protein AGL66 [Brassica napus]
BolC1t00164H	19.578	37.688	21.152	10.501	7.878	7.105	10.881	9.744	4.785	cytochrome P450 81F1-like [Brassica napus]
BolC1t00165H	0.141	0.239	0.288	4.405	10.997	7.600	0.300	0.000	5.666	cytochrome P450 81F1-like [Brassica napus]
BolC1t00166H	0.000	0.000	0.000	0.000	0.000	0.000	0.000	0.000	0.000	PREDICTED: UPF0392 protein At1g27200 [Brassica oleracea var. oleracea]
BolC1t00167H	0.000	0.000	0.000	0.078	0.000	0.000	0.000	0.000	0.000	AT5G56500 [Arabidopsis thaliana]
BolC1t00168H	21.291	21.503	22.402	155.401	114.774	46.027	14.391	18.082	47.542	cytochrome P450 81F4 [Brassica napus]
BolC1t00169H	5.534	6.037	4.562	9.372	4.077	2.171	2.938	5.199	3.364	PREDICTED: cytochrome P450 81F3 [Raphanus sativus]
BolC1t00170H	0.000	0.000	0.114	0.654	0.109	0.000	0.107	0.000	1.191	Armadillo-type fold containing protein [Trema orientale]
BolC1t00171H	0.096	0.320	0.870	1.404	0.836	0.312	0.536	0.093	3.804	PREDICTED: indole-3-acetic acid-amido synthetase GH3.2 [Camelina sativa]
BolC1t00172H	0.195	0.644	0.254	19.815	22.306	31.558	136.712	92.641	83.076	LOW QUALITY PROTEIN: cytochrome P450 81D11 [Eutrema salsugineum]
BolC1t00173H	0.399	0.346	0.226	0.093	0.124	0.172	0.000	0.028	0.059	PREDICTED: cytochrome P450 81D11-like [Raphanus sativus]
BolC1t00174H	0.032	0.000	0.000	4.265	2.018	0.619	0.415	0.471	2.411	PREDICTED: isoflavone 3'-hydroxylase [Raphanus sativus]
BolC1t00175H	1.380	2.464	2.305	83.993	107.825	100.394	75.374	100.614	75.850	MEE59 [Arabidopsis thaliana]
BolC1t00176H	0.000	0.000	0.000	0.175	0.352	1.134	2.412	3.754	0.500	PREDICTED: uncharacterized protein LOC108853744 [Raphanus sativus]
BolC1t00177H	0.490	0.198	0.742	0.355	0.535	0.000	0.349	0.475	1.012	hypothetical protein EUTSA_v10027040mg [Eutrema salsugineum]
BolC1t00178H	85.943	58.408	72.490	55.452	51.045	50.699	60.045	54.104	52.145	putative protein [Arabidopsis thaliana]
BolC1t00179H	14.525	14.135	10.667	24.500	26.795	28.729	39.230	37.301	31.250	probable cadmium/zinc-transporting ATPase HMA1, chloroplastic isoform X1 [Brassica napus]
BolC1t00180H	44.159	36.094	77.458	39.235	26.518	25.773	117.423	84.870	68.850	transcription factor MYB44-like [Brassica napus]
BolC1t00181H	0.745	0.701	0.635	2.814	1.870	1.440	0.497	2.310	1.923	PREDICTED: probable LRR receptor-like serine/threonine-protein kinase At4g37250 [Brassica oleracea var. oleracea]
BolC1t00182H	120.559	128.013	104.643	27.108	25.914	32.556	14.828	12.448	7.114	PREDICTED: cysteine proteinase COT44 [Brassica oleracea var. oleracea]
BolC1t00183H	38.853	36.608	33.289	23.013	19.115	13.853	21.817	17.393	18.362	PREDICTED: probable beta-1,4-xylosyltransferase IRX14 [Camelina sativa]
BolC1t00184H	4.965	2.756	5.639	25.208	19.431	9.612	24.905	35.260	41.887	ethylene-responsive transcription factor RAP2-10-like [Brassica napus]
BolC1t00185H	0.000	0.000	0.000	0.000	0.000	0.000	0.000	0.000	0.000	Chain A, Cbs Domain-containing Protein Cbsx1, Chloroplastic [Arabidopsis thaliana]
BolC1t00186H	25.378	17.648	33.127	28.504	25.879	18.556	11.747	17.027	27.684	floral homeotic protein APETALA 2-like isoform X2 [Brassica napus]
BolC1t00187H	0.000	0.000	0.000	0.000	0.000	0.000	0.000	0.000	0.000	unnamed protein product, partial [Brassica oleracea]
BolC1t00188H	41.635	39.744	37.613	16.723	20.353	24.921	14.415	19.931	12.598	Unknown [Brassica oleracea]
BolC1t00189H	0.119	0.289	0.451	0.129	0.173	0.000	8.172	0.423	2.949	mitogen-activated protein kinase kinase kinase 18-like [Brassica napus]
BolC1t00190H	0.000	0.000	0.000	0.000	0.000	0.000	0.063	0.000	0.000	PREDICTED: RNA-binding protein Musashi homolog 2 [Camelina sativa]
BolC1t00191H	0.000	0.000	0.257	0.821	2.225	1.895	0.000	0.293	0.078	RNA-binding protein Musashi homolog 2-like [Brassica napus]
BolC1t00192H	26.208	27.017	17.867	22.454	23.823	21.846	18.104	25.050	23.541	PREDICTED: uncharacterized protein LOC106325688 [Brassica oleracea var. oleracea]
BolC1t00193H	66.388	61.529	67.253	61.412	55.560	68.457	116.165	108.304	102.492	PREDICTED: CLK4-associating serine/arginine rich protein isoform X1 [Brassica oleracea var. oleracea]
BolC1t00194H	53.912	45.356	44.273	79.905	58.514	34.032	55.272	46.940	131.461	PREDICTED: heat stress transcription factor B-1-like [Raphanus sativus]
BolC1t00195H	1.599	3.592	1.786	9.442	10.849	9.764	9.556	6.714	11.253	PREDICTED: red chlorophyll catabolite reductase, chloroplastic [Raphanus sativus]
BolC1t00196H	13.885	24.659	17.447	15.827	19.900	22.107	10.858	11.251	10.380	PREDICTED: methionine aminopeptidase 1D, chloroplastic/mitochondrial [Raphanus sativus]
BolC1t00197H	0.000	0.041	0.039	0.074	0.000	0.000	0.036	0.000	0.106	PREDICTED: patatin-like protein 3 [Raphanus sativus]
BolC1t00198H	1.927	0.922	1.094	5.880	3.680	2.511	1.503	0.575	19.052	patatin-like protein 1 isoform X2 [Brassica napus]
BolC1t00199H	0.854	1.647	1.313	2.867	2.852	1.967	1.314	2.240	1.686	PREDICTED: uncharacterized protein LOC108842428 [Raphanus sativus]
BolC1t00200H	111.985	118.109	119.848	31.496	28.060	26.106	24.822	29.091	28.769	neurofilament medium polypeptide-like [Brassica napus]
BolC1t00201H	0.781	1.675	1.227	2.168	2.413	1.668	1.525	2.432	1.836	putative protein [Arabidopsis thaliana]
BolC1t00202H	12.952	8.728	12.001	8.964	9.363	8.844	6.045	9.019	6.258	cell division cycle-associated 7-like protein [Brassica napus]
BolC1t00203H	0.125	0.151	0.000	3.297	3.809	4.505	1.818	2.376	1.373	putative glucose-6-phosphate 1-epimerase isoform X2 [Brassica napus]
BolC1t00204H	23.830	31.030	27.494	10.840	9.061	8.199	6.761	8.881	8.043	PREDICTED: nuclear pore complex protein NUP58 [Brassica rapa]
BolC1t00205H	2.123	1.983	1.360	25.025	36.596	29.452	67.273	36.344	87.671	methylesterase 9-like [Brassica napus]
BolC1t00206H	0.261	0.190	0.623	0.539	0.057	0.026	0.000	0.000	0.000	L-ascorbate oxidase homolog [Brassica napus]
BolC1t00207H	2.866	4.301	3.558	2.203	2.301	2.445	1.311	1.230	1.332	pentatricopeptide repeat-containing protein At4g37170-like [Brassica napus]
BolC1t00208H	9.653	10.031	10.075	33.079	34.594	44.256	90.579	71.080	86.548	PREDICTED: myb family transcription factor EFM [Brassica rapa]
BolC1t00209H	0.404	0.491	0.000	0.878	0.992	1.420	0.647	0.392	0.104	tubulin-like protein [Arabidopsis thaliana]
BolC1t00210H	14.323	13.873	7.659	37.674	54.498	68.473	53.232	55.031	47.468	PREDICTED: thioredoxin-like protein HCF164, chloroplastic [Raphanus sativus]
BolC1t00211H	25.910	20.371	21.374	16.241	17.895	13.577	15.579	18.906	15.142	PREDICTED: nuclear autoantigenic sperm protein [Brassica rapa]
BolC1t00212H	0.182	0.332	0.000	1.685	0.398	0.000	0.000	0.265	0.094	PREDICTED: CASP-like protein 5C1 [Brassica oleracea var. oleracea]
BolC1t00213H	5.885	6.859	5.080	12.194	8.563	7.561	10.467	6.463	16.767	unnamed protein product [Brassica oleracea]
BolC1t00214H	47.720	53.459	40.972	17.664	15.982	14.002	14.651	17.616	19.191	PREDICTED: cytoplasmic tRNA 2-thiolation protein 2 [Raphanus sativus]
BolC1t00215H	17.006	21.073	12.215	5.095	6.351	8.937	25.083	31.503	38.276	PREDICTED: BEL1-like homeodomain protein 2 [Brassica oleracea var. oleracea]
BolC1t00216H	44.336	36.245	32.298	79.793	55.771	44.177	108.727	90.818	80.225	PREDICTED: protein DA1-related 1-like [Raphanus sativus]
BolC1t00217H	0.466	0.174	0.529	12.226	9.893	12.299	436.189	537.115	677.885	PREDICTED: probable vacuolar amino acid transporter YPQ3 [Raphanus sativus]
BolC1t00218H	0.382	0.567	1.157	0.553	0.185	0.128	0.272	0.329	2.190	PREDICTED: calcium uniporter protein 1, mitochondrial-like [Brassica rapa]
BolC1t00219H	28.468	40.909	34.139	34.312	43.504	46.130	34.016	29.493	28.334	PREDICTED: geranylgeranyl pyrophosphate synthase, chloroplastic/chromoplastic [Raphanus sativus]
BolC1t00220H	7.556	7.914	7.501	5.673	3.619	2.316	2.308	3.493	3.483	unnamed protein product [Brassica oleracea]
BolC1t00221H	60.722	70.721	38.472	22.446	20.737	17.829	48.051	56.839	69.512	unnamed protein product [Brassica oleracea]
BolC1t00222H	0.000	0.000	0.000	0.000	0.000	0.000	0.032	0.029	0.031	PREDICTED: UDP-glycosyltransferase 72C1 [Brassica rapa]
BolC1t00223H	1.677	1.527	0.952	4.328	2.288	1.262	0.224	1.219	2.381	protein-S-isoprenylcysteine O-methyltransferase B [Brassica napus]
BolC1t00224H	6.098	4.651	4.600	6.818	4.469	2.011	0.963	1.387	2.477	PREDICTED: probable Xaa-Pro aminopeptidase P [Brassica rapa]
BolC1t00225H	0.424	0.708	1.746	1.152	0.636	0.319	0.396	0.462	0.985	PREDICTED: probable NAD(P)H dehydrogenase (quinone) FQR1-like 2 [Raphanus sativus]
BolC1t00226H	6.289	7.763	10.714	1.709	1.258	0.421	1.230	1.219	1.731	BnaC04g14040D [Brassica napus]
BolC1t00227H	0.322	0.235	0.146	1.820	2.109	0.970	0.138	0.062	1.596	PREDICTED: homeobox-leucine zipper protein ATHB-40-like [Camelina sativa]
BolC1t00228H	34.153	30.912	77.378	29.655	26.471	27.882	151.643	84.637	74.292	PREDICTED: G-box-binding factor 1 [Raphanus sativus]
BolC1t00229H	1.978	2.749	2.962	2.274	2.972	2.043	5.139	7.666	6.983	ap2 SCARECROW-like protein [Arabidopsis thaliana]
BolC1t00230H	0.000	0.000	0.000	0.000	0.000	0.000	0.000	0.000	0.000	unnamed protein product [Brassica oleracea]
BolC1t00231H	0.000	0.000	0.000	0.000	0.000	0.000	0.000	0.000	0.000	LOW QUALITY PROTEIN: 3-hydroxy-3-methylglutaryl-coenzyme A reductase 1 [Brassica napus]
BolC1t00232H	0.000	0.000	0.064	0.062	0.062	0.284	0.060	0.329	0.175	PREDICTED: splicing factor U2af large subunit A-like [Brassica oleracea var. oleracea]
BolC1t00233H	9.791	6.107	11.394	11.455	9.489	11.036	20.127	48.553	33.583	probable polyol transporter 6 [Brassica napus]
BolC1t00234H	8.952	7.437	12.945	12.313	12.585	11.012	18.699	14.109	16.607	PREDICTED: acidic leucine-rich nuclear phosphoprotein 32-related protein isoform X2 [Brassica rapa]
BolC1t00235H	0.000	0.000	0.000	29.995	42.084	31.290	8.512	20.106	11.468	random slug protein 5-like [Brassica napus]
BolC1t00236H	0.000	0.000	0.000	0.436	0.219	0.806	0.000	0.194	0.000	unnamed protein product [Brassica oleracea]
BolC1t00237H	0.251	0.381	0.427	1.158	0.821	0.566	0.268	0.122	0.259	PREDICTED: GATA transcription factor 19-like [Raphanus sativus]
BolC1t00238H	0.089	0.054	0.000	2.705	1.989	0.714	2.561	1.335	13.857	PREDICTED: monoacylglycerol lipase ABHD6-like [Raphanus sativus]
BolC1t00239H	6.564	7.735	6.852	29.268	24.440	34.347	27.247	60.891	30.095	PREDICTED: monoacylglycerol lipase ABHD6-like isoform X2 [Raphanus sativus]
BolC1t00240H	7.393	9.665	9.734	2.370	1.357	1.532	0.745	1.817	0.811	ATPase family AAA domain-containing protein 3C-like [Brassica napus]
BolC1t00241H	0.000	0.000	0.000	2.290	3.449	1.234	0.187	0.510	0.181	protein RADIALIS-like 3 [Brassica napus]
BolC1t00242H	0.000	0.023	0.044	1.405	0.884	0.349	1.956	1.346	8.086	PREDICTED: U-box domain-containing protein 5-like [Raphanus sativus]
BolC1t00243H	1.787	2.169	1.184	28.585	33.634	40.399	29.076	27.796	22.236	PREDICTED: pheophytinase, chloroplastic-like [Raphanus sativus]
BolC1t00244H	11.723	11.848	8.263	11.341	10.248	9.494	17.638	16.895	18.320	PREDICTED: trichohyalin [Brassica rapa]
BolC1t00245H	2.039	6.601	11.321	15.140	1.360	1.137	21.515	12.731	30.636	unnamed protein product [Brassica rapa]
BolC1t00246H	20.501	21.729	49.013	57.607	17.429	15.348	126.071	98.777	96.702	PREDICTED: uncharacterized protein LOC108840246 [Raphanus sativus]
BolC1t00247H	6.625	4.964	7.352	11.766	11.403	9.044	11.393	18.268	11.256	PREDICTED: salicylate carboxymethyltransferase-like [Brassica oleracea var. oleracea]
BolC1t00248H	0.864	0.700	1.063	3.601	2.515	2.024	4.612	6.002	4.536	PREDICTED: long chain base biosynthesis protein 1 [Raphanus sativus]
BolC1t00249H	0.048	0.098	0.037	0.964	0.370	0.210	0.516	0.359	3.729	PREDICTED: phosphatidylinositol/phosphatidylcholine transfer protein SFH12 [Raphanus sativus]
BolC1t00250H	37.064	32.110	33.887	23.565	21.907	20.046	25.297	27.451	27.125	hypothetical protein EUTSA_v10000178mg [Eutrema salsugineum]
BolC1t00251H	0.694	0.105	0.295	1.225	0.662	1.218	17.856	14.449	11.367	PREDICTED: probable ubiquitin-conjugating enzyme E2 17 [Raphanus sativus]
BolC1t00252H	32.318	38.620	29.754	45.185	49.457	63.159	26.532	29.117	27.804	CDK5RAP1-like protein [Brassica napus]
BolC1t00253H	2.558	1.827	2.279	4.279	3.805	1.586	2.596	2.552	3.521	PREDICTED: 3-epi-6-deoxocathasterone 23-monooxygenase [Brassica oleracea var. oleracea]
BolC1t00254H	0.000	0.000	0.000	0.000	0.000	0.000	0.000	0.000	0.000	pollen-specific leucine-rich repeat extensin-like protein 3 [Brassica napus]
BolC1t00255H	0.000	0.000	0.000	0.000	0.000	0.000	0.000	0.000	0.000	unnamed protein product [Brassica oleracea]
BolC1t00256H	11.364	14.757	17.932	56.210	53.162	33.973	14.041	31.473	9.678	PREDICTED: beta-galactosidase 3 isoform X2 [Brassica oleracea var. oleracea]
BolC1t00257H	8.097	9.496	8.441	9.467	9.954	8.076	9.395	9.136	8.433	PREDICTED: protein MICRORCHIDIA 2-like isoform X6 [Brassica rapa]
BolC1t00258H	0.365	0.886	0.777	0.297	0.398	0.458	0.584	0.177	0.847	PREDICTED: protein SHI RELATED SEQUENCE 2-like [Raphanus sativus]
BolC1t00259H	172.002	106.886	138.826	27.589	30.206	29.434	30.478	40.657	26.693	PREDICTED: aldehyde dehydrogenase family 3 member F1 isoform X2 [Brassica oleracea var. oleracea]
BolC1t00260H	1.931	1.279	2.991	1.336	1.533	1.703	3.997	4.763	2.960	PREDICTED: GATA transcription factor 7 [Brassica oleracea var. oleracea]
BolC1t00261H	0.000	0.000	0.000	0.115	0.000	0.160	0.000	0.000	0.000	PREDICTED: glycine-rich cell wall structural protein [Brassica oleracea var. oleracea]
BolC1t00262H	4.286	9.918	3.980	131.482	99.792	67.944	78.652	67.367	59.640	cytochrome p450-dependent monooxygenase [Brassica napus]
BolC1t00263H	17.841	13.678	20.947	12.896	11.343	10.308	18.796	21.308	21.567	PREDICTED: transmembrane and coiled-coil domain-containing protein 4 [Raphanus sativus]
BolC1t00264H	20.780	20.011	15.821	26.602	26.057	23.592	25.266	32.162	27.874	PREDICTED: probable serine protease EDA2 [Raphanus sativus]
BolC1t00265H	6.081	4.630	4.501	13.706	11.533	6.817	1.343	2.789	1.788	probable LRR receptor-like serine/threonine-protein kinase At4g36180 [Eutrema salsugineum]
BolC1t00266H	1.054	1.966	1.069	2.332	3.246	3.288	4.018	3.612	3.460	NAC domain-containing protein 76-like [Brassica napus]
BolC1t00267H	0.000	0.000	0.000	0.000	0.000	0.000	0.000	0.000	0.000	PREDICTED: disease resistance-like protein CSA1 isoform X2 [Brassica oleracea var. oleracea]
BolC1t00268H	0.000	0.000	0.000	0.000	0.141	0.000	0.138	0.000	0.000	PREDICTED: myb family transcription factor EFM [Brassica rapa]
BolC1t00269H	0.924	0.898	1.679	0.201	0.403	0.000	0.394	0.716	0.191	PREDICTED: thioredoxin-like protein HCF164, chloroplastic [Raphanus sativus]
BolC1t00270H	30.784	29.866	31.472	41.582	45.527	40.883	38.767	38.695	36.484	uncharacterized protein LOC111199298 [Brassica napus]
BolC1t00271H	19.395	12.046	10.255	10.660	6.569	20.251	8.446	10.909	8.861	unnamed protein product, partial [Brassica oleracea]
BolC1t00272H	17.228	10.914	13.683	13.771	14.306	11.027	13.723	13.246	6.638	uncharacterized protein LOC106447657 [Brassica napus]
BolC1t00273H	0.000	0.000	0.000	0.000	0.000	0.000	0.000	0.000	0.000	PREDICTED: uncharacterized protein LOC103863531 [Brassica rapa]
BolC1t00274H	56.178	49.970	54.347	95.130	103.194	85.896	92.021	88.460	82.950	unnamed protein product [Brassica oleracea]
BolC1t00275H	0.000	0.110	0.000	0.197	0.000	0.182	0.097	0.000	0.187	PREDICTED: disease resistance protein RRS1 [Brassica rapa]
BolC1t00276H	472.690	621.553	541.062	206.085	149.193	133.028	14.873	24.907	27.823	PREDICTED: 60S ribosomal protein L8-3-like [Brassica rapa]
BolC1t00277H	0.000	0.021	0.118	3.350	3.629	2.103	0.536	1.410	1.788	LOW QUALITY PROTEIN: filament-like plant protein 5 [Brassica napus]
BolC1t00278H	0.000	0.000	0.000	7.559	6.131	0.806	0.000	1.944	0.552	PREDICTED: auxin-induced protein 15A-like [Raphanus sativus]
BolC1t00279H	10.210	10.360	8.874	20.681	19.251	13.231	12.277	11.984	13.114	PREDICTED: oral-facial-digital syndrome 1 protein [Brassica oleracea var. oleracea]
BolC1t00280H	1.908	0.450	1.084	1.210	1.272	3.298	4.185	2.927	2.024	RNA demethylase ALKBH5-like [Brassica napus]
BolC1t00281H	0.129	0.000	0.000	0.000	0.000	0.000	0.413	0.000	0.665	RNA demethylase ALKBH5-like [Brassica napus]
BolC1t00282H	3.426	3.766	3.663	3.786	3.981	3.182	4.632	5.713	4.834	PREDICTED: transcription-associated protein 1 [Brassica oleracea var. oleracea]
BolC1t00283H	0.716	0.736	0.938	0.898	0.842	0.885	3.527	3.042	2.559	PREDICTED: transcription factor bHLH11-like isoform X3 [Brassica oleracea var. oleracea]
BolC1t00284H	11.620	11.165	9.639	11.087	11.184	14.488	31.636	30.676	20.781	DNA-(apurinic or apyrimidinic site) lyase 2-like isoform X1 [Brassica napus]
BolC1t00285H	42.220	24.063	33.860	46.446	40.905	41.601	172.043	185.103	253.250	PREDICTED: chaperone protein dnaJ 11, chloroplastic [Brassica oleracea var. oleracea]
BolC1t00286H	98.036	106.347	113.043	35.635	31.742	24.587	38.238	34.452	33.337	PREDICTED: cold shock domain-containing protein 3-like [Brassica oleracea var. oleracea]
BolC1t00287H	27.537	22.477	15.742	3.653	4.020	2.727	14.693	5.354	6.180	thaumatin-like protein 1b isoform X2 [Brassica napus]
BolC1t00288H	2.964	1.440	1.916	2.924	4.628	3.982	5.110	6.407	5.932	PREDICTED: calmodulin-lysine N-methyltransferase-like [Brassica rapa]
BolC1t00289H	38.820	38.130	27.960	43.904	38.405	41.342	33.008	31.347	33.886	uncharacterized protein LOC17879577 [Capsella rubella]
BolC1t00290H	3.749	1.881	2.782	4.074	3.764	2.759	4.107	6.587	8.204	PREDICTED: L-ascorbate peroxidase 5, peroxisomal [Raphanus sativus]
BolC1t00291H	0.070	0.000	0.079	0.076	0.153	0.140	0.000	0.000	0.000	rac-like GTP-binding protein ARAC1 [Brassica napus]
BolC1t00292H	1.382	1.353	4.608	0.921	1.071	1.387	1.665	1.426	1.703	PREDICTED: glutamic acid-rich protein-like isoform X2 [Raphanus sativus]
BolC1t00293H	9.564	7.146	6.988	18.534	16.240	12.621	6.209	8.068	6.663	PREDICTED: protein MID1-COMPLEMENTING ACTIVITY 1 [Brassica oleracea var. oleracea]
BolC1t00294H	0.000	0.000	0.000	0.000	0.000	0.000	0.000	0.000	0.000	unnamed protein product, partial [Brassica oleracea]
BolC1t00295H	0.000	0.000	0.000	0.000	0.000	0.000	0.000	0.000	0.000	auxilin-related protein 1-like [Brassica napus]
BolC1t00296H	2.070	1.975	2.015	0.803	1.936	0.594	0.473	0.143	0.458	unnamed protein product [Brassica oleracea]
BolC1t00297H	0.000	0.000	0.000	0.000	0.000	0.000	0.000	0.000	0.000	cyclase family protein [Arabidopsis lyrata subsp. lyrata]
BolC1t00298H	0.000	0.134	0.000	0.120	0.000	0.222	0.000	0.000	0.000	hypothetical protein F2Q68_00028789 [Brassica cretica]
BolC1t00299H	0.000	0.000	0.000	0.054	0.217	0.250	0.478	0.820	0.411	protein FD-like [Brassica napus]
BolC1t00300H	38.170	35.791	37.821	27.942	27.565	22.027	21.425	20.249	18.475	PREDICTED: la-related protein 1C-like [Brassica rapa]
BolC1t00301H	6.415	3.654	4.558	12.021	10.487	7.314	4.902	6.242	5.723	aspartyl protease family protein 1-like [Brassica napus]
BolC1t00302H	0.000	0.000	0.000	0.000	0.000	0.000	0.000	0.000	0.000	unnamed protein product [Brassica oleracea]
BolC1t00303H	39.683	26.223	28.818	77.973	65.504	59.116	122.875	94.880	110.661	GTP-binding 2 [Arabidopsis lyrata subsp. lyrata]
BolC1t00304H	78.410	74.522	71.818	24.948	25.672	20.609	6.251	8.849	8.127	pentatricopeptide repeat-containing protein At4g35850, mitochondrial [Brassica napus]
BolC1t00305H	44.022	31.599	33.244	29.437	29.754	21.265	42.131	41.285	40.269	PREDICTED: NEP1-interacting protein 1 isoform X2 [Raphanus sativus]
BolC1t00306H	78.522	61.180	53.620	76.215	69.433	55.202	50.199	51.254	66.373	aconitate hydratase 1-like [Brassica napus]
BolC1t00307H	0.000	0.000	0.000	0.000	0.000	0.000	0.208	0.000	0.302	probable prolyl 4-hydroxylase 11 [Brassica napus]
BolC1t00308H	0.000	0.000	0.000	0.000	0.000	0.000	0.000	0.000	0.000	probable prolyl 4-hydroxylase 8 isoform X1 [Brassica napus]
BolC1t00309H	0.000	0.000	0.000	0.000	0.000	0.000	0.000	0.000	0.000	probable prolyl 4-hydroxylase 11 [Brassica napus]
BolC1t00310H	0.000	0.000	0.000	0.000	0.000	0.000	0.000	0.000	0.000	probable prolyl 4-hydroxylase 8 isoform X1 [Brassica napus]
BolC1t00311H	3.091	3.012	5.202	1.991	2.124	1.724	2.403	3.254	2.600	hypothetical protein F2Q70_00039588 [Brassica cretica]
BolC1t00312H	37.587	36.621	35.059	22.566	21.944	16.684	17.846	21.589	18.411	PREDICTED: serine/arginine-rich splicing factor SR45a-like isoform X2 [Brassica oleracea var. oleracea]
BolC1t00313H	0.000	0.812	0.000	5.088	2.190	0.895	0.714	1.080	0.921	unnamed protein product [Brassica rapa]
BolC1t00314H	10.457	25.487	26.788	293.572	462.996	825.086	1397.736	1263.445	1533.865	din1 [Raphanus sativus]
BolC1t00315H	19.410	17.436	12.053	21.995	26.436	30.215	21.935	22.364	29.895	thiol-disulfide oxidoreductase LTO1-like [Brassica napus]
BolC1t00316H	78.898	88.526	70.062	64.795	65.443	61.780	81.627	92.263	132.272	PREDICTED: ganglioside-induced differentiation-associated protein 2-like [Raphanus sativus]
BolC1t00317H	42.299	35.832	32.767	12.893	13.416	10.217	8.887	7.429	6.414	Regulator of Vps4 activity in the MVB pathway protein [Arabidopsis thaliana]
BolC1t00318H	0.211	0.000	0.160	0.000	0.000	0.000	0.000	0.000	0.000	unnamed protein product [Brassica oleracea]
BolC1t00319H	0.000	0.000	0.000	0.000	0.000	0.000	0.000	0.000	0.000	PREDICTED: uncharacterized protein LOC108838632, partial [Raphanus sativus]
BolC1t00320H	0.600	0.607	0.397	0.000	0.055	0.050	2.400	0.145	0.568	PREDICTED: uncharacterized protein LOC103874453 [Brassica rapa]
BolC1t00321H	0.000	0.000	0.000	0.967	0.204	1.692	1.299	1.951	1.837	PREDICTED: uncharacterized protein LOC104721211 [Camelina sativa]
BolC1t00322H	0.000	0.000	0.000	0.000	0.000	0.000	0.000	0.000	0.056	unnamed protein product [Brassica oleracea]
BolC1t00323H	2.216	0.989	2.295	3.754	2.347	1.701	5.216	2.937	4.609	PREDICTED: probable serine/threonine-protein kinase Cx32, chloroplastic [Brassica rapa]
BolC1t00324H	0.665	0.665	0.355	0.170	0.342	0.785	0.376	0.303	0.121	PREDICTED: protein RKD5 isoform X2 [Raphanus sativus]
BolC1t00325H	1.133	1.650	1.029	4.431	4.697	3.183	5.560	0.878	1.169	uncharacterized protein LOC112082240 [Eutrema salsugineum]
BolC1t00326H	0.219	0.000	0.000	0.000	0.000	0.441	0.703	0.425	0.000	unnamed protein product [Brassica rapa]
BolC1t00327H	139.930	144.200	167.023	65.655	52.294	39.183	26.560	39.327	46.057	high mobility group B protein 4 [Brassica napus]
BolC1t00328H	4.910	6.090	3.538	7.804	9.623	8.480	7.043	5.730	5.614	PREDICTED: WUSCHEL-related homeobox 13-like [Brassica oleracea var. oleracea]
BolC1t00329H	2.326	2.457	2.984	2.889	2.439	2.395	3.675	2.722	3.461	plant-specific TFIIB-related protein PTF2 [Capsella rubella]
BolC1t00330H	5.197	5.372	8.773	3.129	2.989	2.397	1.049	1.293	0.507	putative protein [Arabidopsis thaliana]
BolC1t00331H	1.666	2.529	2.095	6.532	4.676	3.106	2.477	3.921	5.407	unnamed protein product [Brassica rapa]
BolC1t00332H	9.058	6.936	8.424	10.530	11.125	6.906	9.060	12.019	11.632	PREDICTED: probable serine/threonine-protein kinase sky1 [Brassica rapa]
BolC1t00333H	2.809	2.449	3.436	6.027	8.332	4.338	5.380	11.725	9.518	PREDICTED: RING-H2 finger protein ATL45 [Brassica oleracea var. oleracea]
BolC1t00334H	7.396	8.574	9.044	35.848	36.055	19.866	17.078	39.330	20.618	plant intracellular Ras-group-related LRR protein 4-like [Brassica napus]
BolC1t00335H	266.119	263.907	274.809	199.920	204.119	156.332	203.659	212.336	220.082	PREDICTED: ankyrin repeat domain-containing protein 2A-like [Brassica rapa]
BolC1t00336H	0.766	0.525	0.669	6.212	5.681	5.540	9.601	9.403	9.207	PREDICTED: chloride channel protein CLC-e isoform X2 [Brassica oleracea var. oleracea]
BolC1t00337H	0.000	0.588	1.100	1.974	0.793	0.243	0.000	0.000	0.125	PREDICTED: tetraketide alpha-pyrone reductase 1 isoform X1 [Brassica oleracea var. oleracea]
BolC1t00338H	0.669	0.974	0.608	2.035	2.628	0.671	0.000	0.000	0.000	PREDICTED: tetraketide alpha-pyrone reductase 1 isoform X1 [Brassica oleracea var. oleracea]
BolC1t00339H	0.095	0.000	0.036	0.035	0.000	0.000	0.000	0.000	0.033	PREDICTED: putative F-box/LRR-repeat protein At3g18150 [Brassica rapa]
BolC1t00340H	22.332	20.443	23.482	26.735	25.514	20.840	11.916	12.088	11.978	PREDICTED: LOW QUALITY PROTEIN: AP-1 complex subunit sigma-1 [Brassica oleracea var. oleracea]
BolC1t00341H	7.463	7.485	9.687	4.483	2.226	1.163	0.742	1.527	2.153	PREDICTED: AT-hook motif nuclear-localized protein 25-like [Camelina sativa]
BolC1t00342H	4.444	2.010	5.076	5.882	3.694	1.869	0.936	1.580	1.922	brefeldin A-inhibited guanine nucleotide-exchange protein 4-like [Brassica napus]
BolC1t00343H	0.000	0.000	0.000	0.000	0.000	0.000	0.000	0.000	0.000	PREDICTED: periodic tryptophan protein 1 homolog [Raphanus sativus]
BolC1t00344H	55.682	48.843	45.254	43.550	42.109	38.883	34.620	34.134	30.220	hypothetical protein BRARA_A00296 [Brassica rapa]
BolC1t00345H	43.277	30.928	36.048	24.638	18.385	11.470	6.530	6.465	10.998	cysteine protease XCP1 [Brassica napus]
BolC1t00346H	53.700	45.341	48.418	6.824	6.131	5.971	1.763	0.640	1.194	PREDICTED: CMP-sialic acid transporter 4 [Brassica rapa]
BolC1t00347H	43.622	28.291	37.049	7.104	6.075	4.418	1.381	1.066	1.069	PREDICTED: CMP-sialic acid transporter 4 [Brassica rapa]
BolC1t00348H	19.287	23.538	34.150	42.888	37.240	16.282	5.066	24.535	8.986	uncharacterized protein BNAC01G03230D [Brassica napus]
BolC1t00349H	87.643	97.156	189.371	80.490	69.101	50.984	115.533	108.699	86.544	PREDICTED: calcium-dependent protein kinase 5 [Raphanus sativus]
BolC1t00350H	87.561	112.340	131.440	22.155	20.967	19.208	18.644	18.947	26.967	PREDICTED: monosaccharide-sensing protein 2 [Brassica oleracea var. oleracea]
BolC1t00351H	0.169	0.318	0.349	2.608	3.274	3.953	11.951	9.406	8.592	glutamate receptor 3.2-like [Brassica napus]
BolC1t00352H	4.991	3.962	3.161	4.624	4.295	4.592	8.023	6.882	6.540	ubiquitin domain-containing protein DSK2b-like isoform X1 [Brassica napus]
BolC1t00353H	0.000	0.000	0.000	0.000	0.000	0.000	0.000	0.047	0.000	PREDICTED: zinc finger protein ZAT3 [Brassica rapa]
BolC1t00354H	1.322	1.323	1.155	5.935	4.613	4.709	4.712	5.475	6.537	PREDICTED: protein NLP2 [Raphanus sativus]
BolC1t00355H	104.120	99.323	96.356	71.532	62.926	48.503	18.958	24.239	25.002	PREDICTED: isocitrate dehydrogenase [NAD] regulatory subunit 1, mitochondrial [Raphanus sativus]
BolC1t00356H	36.807	27.457	25.472	23.118	21.914	20.679	17.811	21.262	21.845	glycerol-3-phosphate acyltransferase 3-like [Brassica napus]
BolC1t00357H	16.741	15.406	19.991	12.531	11.789	11.740	12.711	16.847	13.150	DNA-directed RNA polymerase subunit beta, putative (DUF630 and DUF632) [Arabidopsis thaliana]
BolC1t00358H	34.017	29.397	32.721	29.262	28.720	24.163	27.523	33.580	28.055	PREDICTED: probable serine/threonine-protein kinase At4g35230 [Camelina sativa]
BolC1t00359H	0.000	0.000	0.392	0.626	0.754	0.462	0.369	0.112	0.832	microtubule-associated protein TORTIFOLIA1-like [Brassica napus]
BolC1t00360H	14.343	15.420	10.465	40.324	44.081	46.442	50.545	44.206	44.064	cyclase family protein [Arabidopsis lyrata subsp. lyrata]
BolC1t00361H	0.000	0.000	0.000	1.899	2.725	4.762	3.930	3.992	1.482	cytokinin riboside 5'-monophosphate phosphoribohydrolase LOG5-like [Brassica napus]
BolC1t00362H	4.164	2.314	5.795	2.740	1.536	0.647	1.346	3.978	3.239	lysine histidine transporter-like 7 [Brassica napus]
BolC1t00363H	15.599	16.987	9.757	11.470	13.155	13.249	13.591	13.319	11.628	PREDICTED: DDB1- and CUL4-associated factor 8-like protein 2 isoform X1 [Brassica oleracea var. oleracea]
BolC1t00364H	2.300	3.432	3.709	0.916	1.015	1.639	0.656	1.038	0.870	PREDICTED: pentatricopeptide repeat-containing protein At4g35130, chloroplastic [Raphanus sativus]
BolC1t00365H	0.246	0.043	0.160	0.000	0.038	0.035	0.000	0.000	0.036	PREDICTED: LOW QUALITY PROTEIN: putative F-box/kelch-repeat protein At4g35120 [Brassica rapa]
BolC1t00366H	0.106	0.064	0.060	0.000	0.000	0.000	0.000	0.000	0.055	PREDICTED: LOW QUALITY PROTEIN: putative F-box/kelch-repeat protein At4g35120 [Brassica rapa]
BolC1t00367H	6.891	2.046	6.806	3.053	2.820	1.128	3.717	6.061	5.490	phospholipase-like protein (PEARLI 4) family protein [Arabidopsis thaliana]
BolC1t00368H	168.137	226.892	123.597	283.943	282.855	211.612	397.933	625.110	418.015	PREDICTED: aquaporin PIP2-7-like [Raphanus sativus]
BolC1t00369H	2.874	1.864	0.779	1.668	1.925	1.902	2.057	3.386	3.338	catalase [Brassica juncea]
BolC1t00370H	36.188	44.294	32.898	32.311	31.452	30.722	28.886	35.914	34.460	unnamed protein product [Brassica oleracea]
BolC1t00371H	2.523	2.318	3.717	3.408	2.604	4.174	13.097	3.039	9.432	PREDICTED: probable BOI-related E3 ubiquitin-protein ligase 2 [Camelina sativa]
BolC1t00372H	0.000	0.000	0.104	41.033	23.887	12.450	8.759	11.753	23.444	PREDICTED: heavy metal-associated isoprenylated plant protein 26 [Brassica oleracea var. oleracea]
BolC1t00373H	1.756	3.072	4.222	1.459	1.183	1.244	2.865	3.703	3.038	PREDICTED: LOW QUALITY PROTEIN: basic leucine zipper 19-like [Raphanus sativus]
BolC1t00374H	0.058	0.000	0.066	2.858	1.798	1.015	0.833	0.252	3.819	PREDICTED: probable receptor-like serine/threonine-protein kinase At5g57670 isoform X2 [Brassica rapa]
BolC1t00375H	23.565	18.939	16.105	31.554	26.676	20.875	18.951	22.115	17.357	At4g35020 [Arabidopsis thaliana]
BolC1t00376H	0.000	0.000	0.000	0.000	0.000	0.017	0.000	0.000	0.000	beta-galactosidase 11 [Brassica napus]
BolC1t00377H	3.279	3.625	11.283	9.360	9.239	5.600	14.779	15.364	20.966	transcription factor MYB32-like [Brassica napus]
BolC1t00378H	1.162	0.128	0.840	26.969	31.001	14.627	7.889	19.135	12.864	PREDICTED: actin-depolymerizing factor 9 [Raphanus sativus]
BolC1t00379H	72.158	56.313	60.758	36.700	37.059	27.067	13.656	19.295	17.722	PREDICTED: peptidyl-prolyl cis-trans isomerase CYP21-1-like [Camelina sativa]
BolC1t00380H	44.780	61.998	53.219	3.225	2.591	1.886	0.765	1.438	1.174	PREDICTED: protein NUCLEAR FUSION DEFECTIVE 4-like [Brassica oleracea var. oleracea]
BolC1t00381H	0.021	0.051	0.120	0.023	0.023	0.000	0.000	0.041	0.022	hypothetical protein EUTSA_v10024628mg [Eutrema salsugineum]
BolC1t00382H	0.000	0.000	0.000	0.000	0.000	0.000	0.000	0.000	0.000	plant cysteine oxidase 3-like isoform X1 [Brassica napus]
BolC1t00383H	30.172	43.027	40.121	8.399	7.065	7.600	4.231	4.406	4.856	DEAD-box ATP-dependent RNA helicase 16-like [Brassica napus]
BolC1t00384H	9.439	8.287	7.399	9.852	9.339	8.486	9.453	8.765	10.944	xanthine dehydrogenase 1 isoform X2 [Brassica napus]
BolC1t00385H	0.537	0.566	0.285	1.635	1.251	0.611	0.344	0.243	0.777	PREDICTED: putative amidase C869.01 [Camelina sativa]
BolC1t00386H	523.628	492.768	401.557	823.077	694.884	519.814	169.376	220.659	265.264	peptidyl-prolyl cis-trans isomerase isoform X2 [Brassica napus]
BolC1t00387H	19.451	17.720	12.157	11.633	9.283	8.075	14.965	15.462	14.658	probable alkaline/neutral invertase B isoform X1 [Brassica napus]
BolC1t00388H	0.107	0.217	0.081	0.194	0.000	0.000	0.153	0.069	0.148	type III polyketide synthase B [Brassica napus]
BolC1t00389H	4.620	7.424	3.521	24.701	28.391	40.606	40.417	42.456	41.624	pentatricopeptide repeat-containing protein MRL1, chloroplastic-like isoform X2 [Brassica napus]
BolC1t00390H	299.217	198.791	268.291	14.391	10.510	4.968	0.285	2.333	1.519	auxin-induced protein 15A-like [Brassica napus]
BolC1t00391H	332.540	189.602	195.708	11.817	8.570	4.699	0.645	1.756	0.624	auxin-responsive family protein [Arabidopsis lyrata subsp. lyrata]
BolC1t00392H	113.417	81.727	49.360	15.119	13.737	8.512	0.141	1.926	0.547	auxin-induced protein 15A-like [Brassica napus]
BolC1t00393H	0.401	0.000	0.304	22.968	28.174	6.579	2.141	13.220	7.595	PREDICTED: auxin-induced protein 15A [Raphanus sativus]
BolC1t00394H	0.000	0.000	0.000	0.000	0.000	0.000	0.000	0.000	0.000	U3 small nucleolar ribonucleoprotein protein IMP3-like [Brassica napus]
BolC1t00395H	0.650	0.158	0.886	7.066	5.961	2.611	1.249	2.016	1.343	putative auxin-regulated protein [Arabidopsis thaliana]
BolC1t00396H	5.696	4.651	5.689	11.207	11.040	6.309	2.935	2.570	2.129	auxin-responsive protein SAUR50-like [Brassica napus]
BolC1t00397H	86.205	93.262	81.860	128.092	110.505	84.044	37.984	43.524	44.325	amidophosphoribosyltransferase 2, chloroplastic-like [Brassica napus]
BolC1t00398H	8.622	9.066	6.259	10.433	10.089	11.956	14.609	18.519	9.269	BnaA05g34940D [Brassica napus]
BolC1t00399H	0.062	0.151	0.118	0.879	0.928	0.646	0.598	0.482	0.407	arginine decarboxylase 2-like [Brassica napus]
BolC1t00400H	69.372	51.806	55.347	86.030	72.458	64.613	54.503	62.891	51.737	PREDICTED: NADH dehydrogenase [ubiquinone] 1 beta subcomplex subunit 9 [Camelina sativa]
BolC1t00401H	11.379	12.136	9.198	8.244	5.314	5.145	5.361	7.252	8.149	PREDICTED: GATA transcription factor 3-like [Brassica rapa]
BolC1t00402H	225.256	239.798	220.551	87.986	76.402	71.739	43.171	46.555	33.869	40S ribosomal protein S3a-2-like [Brassica napus]
BolC1t00403H	50.712	45.122	52.770	28.629	27.466	18.174	20.578	21.848	19.672	SH3 domain-containing protein 2 [Eutrema salsugineum]
BolC1t00404H	10.613	7.490	12.640	60.165	46.158	33.299	62.230	26.977	33.789	inactive squalene synthase 2-like [Brassica napus]
BolC1t00405H	23.341	10.719	17.851	11.920	10.948	6.982	19.413	10.563	21.611	hypothetical protein EUTSA_v10026183mg [Eutrema salsugineum]
BolC1t00406H	85.007	87.061	66.745	108.584	114.689	146.911	162.504	157.223	88.650	PREDICTED: 30S ribosomal protein S16-1, chloroplastic [Camelina sativa]
BolC1t00407H	0.000	0.000	0.000	17.239	8.836	8.790	3.174	3.362	15.693	protein CASPARIAN STRIP INTEGRITY FACTOR 2 isoform X1 [Brassica napus]
BolC1t00408H	6.615	5.941	5.866	18.415	18.195	9.277	21.854	32.135	37.324	PREDICTED: ocs element-binding factor 1-like [Brassica oleracea var. oleracea]
BolC1t00409H	0.179	0.373	0.320	13.401	6.254	2.414	0.683	0.545	2.034	phosphatidylinositol/phosphatidylcholine transfer protein SFH1 isoform X2 [Brassica napus]
BolC1t00410H	20.086	24.636	24.231	12.604	12.129	12.127	9.194	8.941	7.500	PREDICTED: bifunctional dihydrofolate reductase-thymidylate synthase 2 isoform X1 [Brassica rapa]
BolC1t00411H	0.000	0.000	0.000	0.143	0.645	0.264	2.101	3.879	3.117	PREDICTED: uncharacterized protein LOC108842568 [Raphanus sativus]
BolC1t00412H	9.199	8.990	7.848	22.188	18.021	16.665	7.949	9.609	8.246	PREDICTED: probable pinoresinol-lariciresinol reductase 3 [Raphanus sativus]
BolC1t00413H	0.000	0.000	0.000	0.000	0.000	0.000	0.000	0.000	0.000	unnamed protein product [Brassica oleracea]
BolC1t00414H	0.000	0.000	0.000	0.000	0.000	0.000	0.000	0.000	0.000	unnamed protein product [Brassica oleracea]
BolC1t00415H	36.883	35.220	19.691	22.374	18.602	22.673	8.006	26.734	26.116	Unknown [Brassica napus]
BolC1t00416H	5.006	3.855	2.891	9.108	12.830	9.877	4.854	6.486	6.231	PREDICTED: probable receptor-like serine/threonine-protein kinase At4g34500 [Brassica oleracea var. oleracea]
BolC1t00417H	56.440	56.456	51.917	70.913	66.103	52.012	39.379	46.210	41.577	PREDICTED: cyclase-associated protein 1 isoform X1 [Raphanus sativus]
BolC1t00418H	4.857	7.246	6.620	55.865	63.522	68.119	182.880	146.932	115.164	glucan endo-1,3-beta-glucosidase 7-like [Brassica napus]
BolC1t00419H	35.000	33.294	33.929	37.189	30.939	28.344	42.546	35.859	38.473	heterotrimeric G-protein beta subunit 3 [Brassica juncea]
BolC1t00420H	140.779	107.202	114.323	82.701	80.578	59.585	28.709	37.529	34.001	AT4G34450 [Arabidopsis thaliana]
BolC1t00421H	8.987	9.062	7.724	5.431	5.685	4.644	4.923	5.613	5.755	PREDICTED: SWI/SNF complex subunit SWI3D [Brassica oleracea var. oleracea]
BolC1t00422H	4.759	5.356	5.273	1.261	2.027	1.515	0.372	1.575	0.719	EKC/KEOPS complex subunit Tprkb [Brassica napus]
BolC1t00423H	6.838	7.068	9.235	6.728	6.555	4.730	11.143	12.535	11.065	PREDICTED: heat stress transcription factor A-4a-like [Brassica rapa]
BolC1t00424H	0.000	0.000	0.000	0.277	0.111	0.000	61.908	2.219	39.348	PREDICTED: ethylene-responsive transcription factor ERF109 [Brassica rapa]
BolC1t00425H	0.000	0.000	0.000	0.000	0.000	0.000	0.000	0.000	0.000	PREDICTED: extra-large guanine nucleotide-binding protein 2-like [Raphanus sativus]
BolC1t00426H	6.337	8.176	12.296	8.753	7.673	6.577	16.908	10.891	14.380	PREDICTED: extra-large guanine nucleotide-binding protein 2 [Brassica rapa]
BolC1t00427H	0.000	0.000	0.000	0.193	0.097	0.059	0.032	0.029	0.031	protein JINGUBANG-like [Brassica napus]
BolC1t00428H	9.747	8.156	7.256	6.738	6.177	6.082	11.504	10.765	11.372	IBR domain-containing protein [Arabidopsis lyrata subsp. lyrata]
BolC1t00429H	31.788	26.489	24.459	8.802	8.635	7.895	3.697	6.351	4.736	PREDICTED: endothelin-converting enzyme 2 [Brassica rapa]
BolC1t00430H	0.694	0.421	0.394	6.407	7.002	14.794	38.488	25.538	21.660	PREDICTED: 4-hydroxy-3-methylbut-2-enyl diphosphate reductase, chloroplastic [Brassica rapa]
BolC1t00431H	0.995	0.806	0.419	5.729	9.333	15.319	35.248	23.932	23.481	PREDICTED: 4-hydroxy-3-methylbut-2-enyl diphosphate reductase, chloroplastic [Brassica rapa]
BolC1t00432H	4.957	3.296	5.004	3.036	3.349	4.383	4.744	4.384	4.143	PREDICTED: transcription initiation factor TFIID subunit 8 [Brassica rapa]
BolC1t00433H	5.442	5.877	4.761	4.668	4.600	3.975	5.153	5.800	5.248	alpha/beta-hydrolases superfamily protein [Brassica napus]
BolC1t00434H	100.755	166.330	116.632	138.587	194.484	210.134	43.010	51.676	43.288	SWIB/MDM2 domain superfamily protein [Brassica napus]
BolC1t00435H	8.468	6.498	7.549	5.285	4.836	4.523	8.135	7.969	10.681	hypothetical protein BRARA_A00389 [Brassica rapa]
BolC1t00436H	54.212	37.790	44.282	38.097	39.055	30.676	14.688	21.230	17.515	PREDICTED: thioredoxin domain-containing protein 9 homolog [Raphanus sativus]
BolC1t00437H	31.468	26.957	25.051	27.904	28.601	21.413	15.709	19.268	18.137	PREDICTED: TIP41-like protein [Brassica oleracea var. oleracea]
BolC1t00438H	65.258	61.839	59.134	40.857	45.673	38.448	21.650	23.919	17.282	unnamed protein product [Brassica oleracea]
BolC1t00439H	142.164	94.386	145.669	31.533	30.563	26.150	33.768	37.450	24.774	altered xyloglucan 8 [Brassica napus]
BolC1t00440H	0.648	0.644	0.836	5.088	9.222	13.004	19.984	20.171	16.110	3-ketoacyl-CoA synthase 16-like [Brassica napus]
BolC1t00441H	4.809	7.075	4.075	16.425	15.883	14.966	54.305	33.407	21.775	PREDICTED: aldehyde dehydrogenase family 3 member I1, chloroplastic isoform X2 [Brassica oleracea var. oleracea]
BolC1t00442H	0.118	0.095	0.089	0.981	0.856	0.551	2.554	0.646	13.487	PREDICTED: cinnamyl alcohol dehydrogenase 5 [Brassica rapa]
BolC1t00443H	8.975	5.307	6.685	10.323	8.332	6.903	31.718	17.562	17.568	agamous-like MADS-box protein AGL16 [Brassica napus]
BolC1t00444H	2.854	2.439	1.727	17.488	19.549	25.406	32.862	46.122	46.561	receptor protein kinase-like protein At4g34220 [Brassica napus]
BolC1t00445H	12.278	10.617	10.497	16.051	17.404	13.779	11.507	14.312	12.488	PREDICTED: LOW QUALITY PROTEIN: receptor protein kinase-like protein At4g34220 [Brassica oleracea var. oleracea]
BolC1t00446H	276.940	243.972	307.757	65.195	45.187	39.813	3.791	5.585	4.202	D-3-phosphoglycerate dehydrogenase 1, chloroplastic-like isoform X1 [Brassica napus]
BolC1t00447H	25.147	43.785	25.005	113.444	155.969	211.748	224.925	215.634	208.380	PREDICTED: stress enhanced protein 1, chloroplastic isoform X1 [Raphanus sativus]
BolC1t00448H	83.027	77.699	71.624	96.803	89.902	67.749	31.862	37.343	36.008	PREDICTED: V-type proton ATPase subunit H [Brassica rapa]
BolC1t00449H	0.000	0.000	0.000	0.000	0.000	0.000	0.000	0.000	0.000	F-box/RNI-like superfamily protein [Brassica napus]
BolC1t00450H	0.000	0.000	0.000	0.000	0.000	0.000	0.000	0.000	0.000	unnamed protein product [Brassica oleracea]
BolC1t00451H	0.000	0.000	0.000	0.000	0.000	0.000	0.000	0.000	0.000	unnamed protein product [Brassica oleracea]
BolC1t00452H	3.633	3.683	5.232	2.686	2.534	3.233	0.639	1.815	1.933	cyclin D-type protein [Brassica napus]
BolC1t00453H	7.906	8.712	21.423	9.321	6.765	6.365	20.736	12.546	22.746	uncharacterized protein LOC106441985 [Brassica napus]
BolC1t00454H	22.398	28.330	19.039	18.341	15.884	14.780	56.387	27.850	33.501	UDP-glycosyltransferase 73B1-like [Brassica napus]
BolC1t00455H	38.681	56.586	42.285	4.257	1.773	1.252	2.075	0.562	17.256	PREDICTED: UDP-glycosyltransferase 73B3-like [Raphanus sativus]
BolC1t00456H	0.058	0.318	0.099	0.538	0.286	0.000	0.000	0.000	0.421	UDP-glucosyl transferase 73B3 [Brassica napus]
BolC1t00457H	6.161	8.929	8.653	0.864	0.795	1.064	2.050	1.862	1.710	PREDICTED: LOW QUALITY PROTEIN: CBS domain-containing protein CBSX2, chloroplastic [Brassica oleracea var. oleracea]
BolC1t00458H	202.951	181.810	184.590	187.769	175.191	199.594	357.372	421.170	335.548	PREDICTED: polyadenylate-binding protein 2 [Brassica rapa]
BolC1t00459H	64.575	59.709	67.244	35.633	32.065	25.856	37.531	35.674	35.797	PREDICTED: probable E3 ubiquitin ligase SUD1 isoform X2 [Brassica oleracea var. oleracea]
BolC1t00460H	3.253	3.750	3.054	5.692	6.472	6.707	20.728	19.549	16.185	DEMETER-like protein 3 isoform X3 [Brassica napus]
BolC1t00461H	26.322	30.888	21.834	12.284	18.686	21.559	10.469	8.207	7.926	protein DJ-1 homolog C-like [Brassica napus]
BolC1t00462H	0.000	0.196	0.138	0.132	0.132	0.041	0.948	0.547	0.292	protein DJ-1 homolog C-like [Brassica napus]
BolC1t00463H	7.679	6.952	5.241	41.544	34.772	39.622	307.708	83.026	66.795	PREDICTED: ABSCISIC ACID-INSENSITIVE 5-like protein 6 [Raphanus sativus]
BolC1t00464H	13.789	8.604	8.483	1.943	1.045	1.282	1.226	0.619	2.768	uncharacterized protein LOC106370891 [Brassica napus]
BolC1t00465H	0.040	0.120	0.112	0.558	0.690	0.397	0.253	0.287	0.347	PREDICTED: pollen-specific leucine-rich repeat extensin-like protein 4 [Brassica oleracea var. oleracea]
BolC1t00466H	8.725	12.919	6.284	16.420	28.333	21.787	3.861	9.485	2.856	unnamed protein product [Brassica rapa]
BolC1t00467H	0.577	0.794	1.704	3.011	2.646	3.051	8.706	7.159	6.237	PREDICTED: serine/threonine-protein kinase SRK2E isoform X4 [Camelina sativa]
BolC1t00468H	34.355	31.033	28.117	17.041	17.686	13.261	5.995	5.862	6.023	PREDICTED: armadillo repeat-containing protein 6 [Brassica rapa]
BolC1t00469H	6.456	5.020	6.754	7.755	7.046	6.026	11.846	9.823	9.939	PREDICTED: E3 ubiquitin-protein ligase RNF170 [Brassica oleracea var. oleracea]
BolC1t00470H	266.343	304.072	267.169	112.558	96.918	76.054	36.740	50.738	34.650	zinc finger SWIM domain-containing protein 7 isoform X2 [Brassica napus]
BolC1t00471H	0.000	0.000	0.000	2.675	1.189	0.972	0.000	0.078	0.250	transcription factor bHLH85 [Brassica napus]
BolC1t00472H	0.000	0.000	0.000	0.000	0.000	0.000	0.000	0.000	0.000	hypothetical protein F2Q70_00044057 [Brassica cretica]
BolC1t00473H	0.632	0.523	0.196	0.312	0.690	0.778	0.398	0.584	0.474	putative Peroxidase 48 isoform X2 [Brassica napus]
BolC1t00474H	0.617	0.094	0.263	0.252	0.253	0.465	0.082	0.000	0.000	At4g33800-like protein [Brassica napus]
BolC1t00475H	0.711	0.483	1.001	27.190	24.419	31.163	28.763	29.670	12.151	Wax1 [Brassica oleracea var. oleracea]
BolC1t00476H	14.899	16.016	10.616	19.904	18.901	14.288	11.798	9.977	13.128	protein SHORT HYPOCOTYL IN WHITE LIGHT 1-like [Brassica napus]
BolC1t00477H	6.639	6.245	7.955	8.008	6.927	6.921	12.302	8.095	8.926	PREDICTED: inositol-tetrakisphosphate 1-kinase 2 [Brassica rapa]
BolC1t00478H	10.681	13.964	11.152	13.595	20.261	24.924	6.170	7.232	6.425	aspartate--tRNA ligase, chloroplastic/mitochondrial [Brassica napus]
BolC1t00479H	12.935	11.317	9.038	19.467	17.750	13.811	21.450	24.669	24.253	cilia- and flagella-associated protein 251 [Brassica napus]
BolC1t00480H	0.000	0.000	0.000	31.938	20.821	6.682	0.000	0.944	1.425	pathogenesis-related protein-like [Arabidopsis thaliana]
BolC1t00481H	0.161	0.000	0.547	498.808	187.961	119.869	0.514	0.622	27.259	pathogenesis-related protein 1 precursor, 19.3K [Arabidopsis thaliana]
BolC1t00482H	1.003	1.015	1.139	1.090	2.007	3.357	8.565	5.995	5.351	calcium-transporting ATPase 10, plasma membrane-type-like isoform X3 [Abrus precatorius]
BolC1t00483H	36.232	34.627	33.438	18.990	18.602	15.388	9.816	13.929	14.704	PREDICTED: DUF21 domain-containing protein At4g33700 [Brassica oleracea var. oleracea]
BolC1t00484H	15.779	14.064	18.557	8.149	6.717	5.223	11.405	9.326	10.802	PREDICTED: pre-mRNA-splicing factor CWC22 homolog [Raphanus sativus]
BolC1t00485H	0.074	0.359	0.336	2.249	2.017	1.707	0.316	1.218	0.305	PREDICTED: LL-diaminopimelate aminotransferase, chloroplastic isoform X1 [Brassica rapa]
BolC1t00486H	0.167	0.000	0.000	14.173	13.503	5.538	8.743	6.481	11.738	At4g33666-like protein [Brassica napus]
BolC1t00487H	17.271	17.053	10.563	121.901	111.851	64.391	74.131	83.495	61.133	_
BolC1t00488H	50.061	51.369	49.714	27.231	23.716	19.131	17.085	20.439	20.851	dynamin-related protein 3A isoform X2 [Brassica napus]
BolC1t00489H	140.739	92.016	96.707	199.378	222.251	147.583	70.414	91.721	61.623	PREDICTED: costars family protein ST45-2 [Raphanus sativus]
BolC1t00490H	7.231	6.838	7.186	8.085	7.664	6.560	9.943	13.475	16.581	PREDICTED: uncharacterized protein LOC106313658 [Brassica oleracea var. oleracea]
BolC1t00491H	3.268	3.668	2.267	1.882	1.639	1.951	3.884	4.126	4.322	probable ubiquitin-like-specific protease 2A isoform X2 [Brassica napus]
BolC1t00492H	0.462	0.323	0.423	13.758	2.519	1.105	0.625	0.447	0.623	4-substituted benzoates-glutamate ligase GH3.12-like [Brassica napus]
BolC1t00493H	34.345	27.540	25.669	30.044	39.596	48.896	57.067	49.275	51.206	uncharacterized protein BNAC01G04650D [Brassica napus]
BolC1t00494H	17.081	17.534	18.107	26.402	24.856	19.746	30.928	24.068	19.543	potassium transporter 13 [Brassica napus]
BolC1t00495H	11.589	13.944	12.482	16.891	18.073	20.169	13.950	16.613	13.433	P-type ATP-ase 1 [Arabidopsis thaliana]
BolC1t00496H	33.259	39.209	26.000	40.562	58.686	69.294	41.454	43.748	40.558	PREDICTED: phospho-2-dehydro-3-deoxyheptonate aldolase 2, chloroplastic [Camelina sativa]
BolC1t00497H	1.803	2.029	0.768	6.795	9.918	10.818	12.243	11.972	9.634	probable protein phosphatase 2C 62 isoform X1 [Brassica napus]
BolC1t00498H	9.182	10.447	9.540	2.365	1.781	1.468	1.815	1.417	1.685	protein ROOT PRIMORDIUM DEFECTIVE 1 [Brassica napus]
BolC1t00499H	9.701	7.813	10.313	6.176	6.345	5.377	6.135	6.836	6.440	PREDICTED: aspartic proteinase Asp1 [Brassica oleracea var. oleracea]
BolC1t00500H	16.363	19.563	15.732	16.859	23.888	31.356	16.926	17.578	16.055	histone deacetylase 14 [Brassica napus]
BolC1t00501H	0.551	0.669	1.407	0.748	0.150	0.276	29.242	0.801	10.235	uncharacterized protein BNAC07G44290D [Brassica napus]
BolC1t00502H	3.844	5.228	2.678	5.292	7.048	7.460	7.057	6.407	5.768	ABC transporter I family member 10, chloroplastic [Brassica napus]
BolC1t00503H	0.000	0.000	0.000	0.000	0.000	0.000	0.000	0.000	0.000	PREDICTED: transcriptional activator Myb-like [Brassica oleracea var. oleracea]
BolC1t00504H	1.875	2.240	0.676	0.614	0.617	0.508	0.476	0.605	0.553	probable polygalacturonase isoform X1 [Brassica napus]
BolC1t00505H	36.137	27.537	48.751	26.190	23.447	17.582	26.777	27.961	26.532	BRASSINOSTEROID INSENSITIVE 1-associated receptor kinase 1 [Brassica napus]
BolC1t00506H	0.088	0.053	0.150	12.354	9.676	4.714	12.553	19.691	23.335	peroxidase 47-like [Brassica napus]
BolC1t00507H	8.736	9.052	6.287	5.852	4.191	3.855	3.375	2.445	3.732	signal peptide peptidase-like 1 [Brassica napus]
BolC1t00508H	0.330	0.374	0.800	5.191	4.949	3.955	0.141	0.576	0.273	protein CYPRO4-like [Brassica napus]
BolC1t00509H	0.017	0.041	0.097	0.037	0.000	0.017	0.036	0.000	0.000	PREDICTED: protein WEAK CHLOROPLAST MOVEMENT UNDER BLUE LIGHT-like 1 [Brassica rapa]
BolC1t00510H	47.503	39.530	43.708	26.279	24.421	22.073	23.193	26.927	27.092	PREDICTED: uncharacterized protein LOC106324287 [Brassica oleracea var. oleracea]
BolC1t00511H	13.493	16.280	12.819	10.237	13.012	14.864	6.475	5.345	6.352	PREDICTED: protein TIC 22, chloroplastic-like [Brassica rapa]
BolC1t00512H	0.000	0.000	0.000	2.364	1.439	0.836	0.593	0.605	1.099	UDP-glucuronate:xylan alpha-glucuronosyltransferase 2 isoform X1 [Eutrema salsugineum]
BolC1t00513H	0.386	1.124	0.876	3.438	4.379	3.331	35.220	23.978	14.048	probable disease resistance protein At4g33300 [Brassica napus]
BolC1t00514H	8.376	4.828	5.766	5.425	4.894	4.841	14.085	9.018	8.909	serine/threonine-protein kinase PAK 3-like isoform X5 [Brassica napus]
BolC1t00515H	0.803	0.487	0.456	3.707	3.503	3.021	5.995	11.276	5.385	hypothetical protein DY000_00030732 [Brassica cretica]
BolC1t00516H	0.692	0.593	0.509	3.230	3.688	3.800	6.908	6.706	2.816	probable disease resistance protein At4g33300 [Brassica napus]
BolC1t00517H	0.293	0.000	0.000	0.000	0.000	0.000	0.000	0.000	0.000	1-aminocyclopropane-1-carboxylate oxidase 1-like [Brassica napus]
BolC1t00518H	0.000	0.000	0.000	0.000	0.000	0.000	0.000	0.000	0.000	unnamed protein product [Brassica oleracea]
BolC1t00519H	44.626	43.287	43.657	36.701	33.629	30.696	8.880	11.890	11.360	cell division cycle 20.1, cofactor of APC complex-like [Brassica napus]
BolC1t00520H	5.162	5.319	4.162	8.341	8.288	7.396	14.094	13.492	13.119	1-phosphatidylinositol-3-phosphate 5-kinase FAB1A-like isoform X1 [Brassica napus]
BolC1t00521H	17.119	12.034	13.092	21.081	26.086	9.921	6.024	17.256	8.754	probable pectinesterase/pectinesterase inhibitor 44 isoform X2 [Brassica napus]
BolC1t00522H	13.619	11.644	13.486	11.764	10.311	10.224	13.626	15.534	16.052	PREDICTED: F-box/LRR-repeat protein 15 isoform X1 [Brassica rapa]
BolC1t00523H	10.926	11.311	10.512	7.076	6.841	7.003	8.040	8.576	7.527	PREDICTED: myosin-15 isoform X2 [Brassica oleracea var. oleracea]
BolC1t00524H	0.136	0.386	0.000	5.137	3.770	2.646	1.164	1.057	5.959	PREDICTED: 2-hydroxymuconate semialdehyde hydrolase-like [Brassica oleracea var. oleracea]
BolC1t00525H	0.938	1.467	1.647	0.494	0.310	0.514	0.091	0.165	0.147	pentatricopeptide repeat-containing protein At4g33170-like [Brassica napus]
BolC1t00526H	5.284	3.518	8.828	3.223	2.009	1.506	1.419	1.751	2.675	At4g33160 [Arabidopsis lyrata subsp. lyrata]
BolC1t00527H	2.171	3.182	1.203	29.146	25.093	21.020	125.528	95.470	148.260	alpha-aminoadipic semialdehyde synthase isoform X1 [Brassica napus]
BolC1t00528H	0.000	0.000	0.000	0.246	0.000	0.000	0.000	0.000	0.000	hypothetical protein F2Q68_00028958 [Brassica cretica]
BolC1t00529H	0.000	0.000	0.000	0.000	0.000	0.000	0.000	0.000	0.000	PREDICTED: uncharacterized protein LOC106329019 [Brassica oleracea var. oleracea]
BolC1t00530H	0.000	0.000	0.000	0.000	0.000	0.000	0.000	0.000	0.000	unnamed protein product, partial [Brassica oleracea]
BolC1t00531H	0.000	0.000	0.000	0.000	0.000	0.000	0.000	0.000	0.000	PREDICTED: uncharacterized protein LOC106329019 [Brassica oleracea var. oleracea]
BolC1t00532H	0.000	0.000	0.000	0.000	0.000	0.000	0.000	0.000	0.000	PREDICTED: uncharacterized protein LOC106329019 [Brassica oleracea var. oleracea]
BolC1t00533H	0.000	0.000	0.000	0.000	0.000	0.000	0.000	0.000	0.000	uncharacterized protein LOC106438505 [Brassica napus]
BolC1t00534H	21.421	15.484	15.005	15.671	21.695	21.293	7.250	8.602	7.572	hypothetical protein BRARA_A00478 [Brassica rapa]
BolC1t00535H	1.663	1.571	0.979	3.347	5.176	3.030	0.460	1.373	0.636	PREDICTED: rho GTPase-activating protein 7 isoform X1 [Raphanus sativus]
BolC1t00536H	0.000	0.000	0.000	0.042	0.000	0.000	0.000	0.000	0.040	PREDICTED: kinesin-like protein KIN-4C [Raphanus sativus]
BolC1t00537H	0.079	0.144	0.627	2.401	0.603	0.634	0.337	0.191	0.163	(S)-coclaurine N-methyltransferase-like [Brassica napus]
BolC1t00538H	12.558	11.837	15.013	7.721	9.016	4.312	9.522	10.887	8.188	hypothetical protein F2Q68_00028966 [Brassica cretica]
BolC1t00539H	67.465	67.181	59.199	80.725	75.046	64.147	47.617	50.258	59.951	PREDICTED: aminopeptidase M1 [Brassica oleracea var. oleracea]
BolC1t00540H	51.695	42.699	30.891	41.651	41.650	39.337	46.838	32.819	32.540	PREDICTED: serine/threonine-protein kinase tricorner-like [Raphanus sativus]
BolC1t00541H	43.779	40.066	46.534	18.686	14.801	14.097	15.533	15.149	17.399	peptidyl-prolyl cis-trans isomerase CYP57 [Brassica napus]
BolC1t00542H	12.124	11.272	34.312	8.480	3.231	2.329	16.483	11.283	16.937	putative protein [Arabidopsis thaliana]
BolC1t00543H	18.210	9.409	11.331	41.685	38.161	24.987	39.900	43.925	36.999	glutaredoxin-like protein [Arabidopsis thaliana]
BolC1t00544H	11.434	12.650	12.767	20.491	29.152	36.979	8.977	11.735	8.385	UDP-sulfoquinovose synthase, chloroplastic-like [Brassica napus]
BolC1t00545H	0.000	0.000	0.189	3.183	1.235	0.401	0.249	0.322	0.584	PREDICTED: zinc transporter 9 [Brassica oleracea var. oleracea]
BolC1t00546H	283.157	387.244	314.177	335.751	308.352	380.013	416.196	435.588	437.542	mitochondrial glycine decarboxylase multienzyme complex P-protein precursor [Moricandia arvensis]
BolC1t00547H	8.651	5.662	6.062	13.859	14.469	14.210	20.924	23.081	25.867	PREDICTED: calcineurin B-like protein 10 isoform X1 [Brassica oleracea var. oleracea]
BolC1t00548H	0.000	0.000	0.000	0.000	0.000	0.000	0.000	0.000	0.000	unnamed protein product [Brassica oleracea]
BolC1t00549H	0.060	0.292	0.102	0.294	0.852	0.753	0.192	0.785	0.000	homeobox protein ATH1 [Brassica napus]
BolC1t00550H	0.000	0.149	0.000	0.000	0.000	0.000	0.230	0.089	0.095	unnamed protein product [Brassica rapa]
BolC1t00551H	0.000	0.000	0.126	0.000	0.000	0.111	0.826	0.750	0.685	hypothetical protein CARUB_v10005423mg, partial [Capsella rubella]
BolC1t00552H	0.000	0.000	0.000	0.064	0.000	0.000	0.000	0.000	0.000	PREDICTED: homeobox protein ATH1 [Raphanus sativus]
BolC1t00553H	0.145	0.000	0.000	3.619	2.054	0.727	1.082	1.122	1.495	unnamed protein product [Brassica oleracea]
BolC1t00554H	0.000	0.000	0.000	0.000	0.000	0.000	0.000	0.000	0.000	unnamed protein product [Brassica oleracea]
BolC1t00555H	0.149	0.181	0.000	0.650	0.652	1.050	1.116	1.303	1.234	unnamed protein product [Brassica oleracea]
BolC1t00556H	90.973	88.271	63.610	109.815	75.005	51.450	44.719	67.238	98.346	PREDICTED: vacuolar-processing enzyme gamma-isozyme [Raphanus sativus]
BolC1t00557H	31.935	26.493	22.313	63.598	71.894	67.718	50.764	50.306	40.046	PREDICTED: UPF0587 protein C1orf123 homolog [Raphanus sativus]
BolC1t00558H	2.996	2.920	4.388	4.702	3.044	2.661	11.686	6.045	7.265	unnamed protein product [Brassica rapa]
BolC1t00559H	47.767	50.898	48.099	27.296	24.870	25.053	19.393	22.670	23.809	PREDICTED: nuclear pore complex protein NUP85 [Brassica oleracea var. oleracea]
BolC1t00560H	40.252	44.743	30.505	32.572	37.766	43.746	53.154	53.876	43.424	peptidyl-tRNA hydrolase 2, mitochondrial-like [Brassica napus]
BolC1t00561H	0.168	0.000	0.000	0.000	0.000	0.000	0.000	0.000	0.000	unnamed protein product [Brassica oleracea]
BolC1t00562H	1.661	2.384	4.460	2.462	2.307	3.790	1.612	1.463	4.677	unnamed protein product [Brassica oleracea]
BolC1t00563H	0.453	0.367	0.172	0.164	0.989	0.303	0.000	0.293	0.780	unnamed protein product [Brassica oleracea]
BolC1t00564H	57.021	105.389	51.045	65.327	91.659	40.601	76.740	39.739	64.957	unnamed protein product [Brassica oleracea]
BolC1t00565H	0.302	0.367	0.858	0.164	0.330	0.000	0.161	0.439	0.000	unnamed protein product [Brassica oleracea]
BolC1t00566H	14.558	14.142	12.450	21.034	16.262	28.195	61.415	64.893	44.736	hypothetical protein DY000_00030026 [Brassica cretica]
BolC1t00567H	0.000	0.000	0.000	0.000	0.000	0.000	0.000	0.000	0.000	PREDICTED: carotenoid cleavage dioxygenase 8, chloroplastic [Brassica rapa]
BolC1t00568H	1.124	0.682	0.638	0.407	0.204	0.376	1.799	0.907	0.580	unnamed protein product [Brassica oleracea]
BolC1t00569H	0.000	0.000	0.000	0.000	0.000	0.000	0.000	0.061	0.196	carotenoid cleavage dioxygenase 8, chloroplastic-like [Brassica napus]
BolC1t00570H	8.277	10.051	11.713	31.043	23.251	15.868	7.458	8.744	12.958	unnamed protein product [Brassica oleracea]
BolC1t00571H	6.445	3.617	5.179	7.599	5.972	7.445	25.045	27.513	24.354	unknown protein [Arabidopsis thaliana]
BolC1t00572H	0.276	0.431	0.179	0.729	0.732	0.396	0.758	1.338	1.059	PREDICTED: GATA transcription factor 9 [Brassica oleracea var. oleracea]
BolC1t00573H	0.154	0.375	0.526	0.168	0.337	0.155	0.000	5.533	0.319	PREDICTED: uncharacterized protein LOC103850180 isoform X3 [Brassica rapa]
BolC1t00574H	0.000	0.000	0.000	0.000	0.072	0.000	0.000	0.000	0.000	homeobox protein ATH1-like [Brassica napus]
BolC1t00575H	0.000	0.000	0.000	0.000	0.000	0.000	0.000	0.000	0.000	homeobox protein ATH1-like [Brassica napus]
BolC1t00576H	0.000	0.000	0.000	0.000	0.000	0.000	0.000	0.000	0.000	unnamed protein product [Brassica oleracea]
BolC1t00577H	384.876	386.976	377.931	427.669	416.795	368.974	299.765	234.760	314.247	unnamed protein product, partial [Brassica oleracea]
BolC1t00578H	19.302	29.297	23.559	11.976	9.590	9.543	1.537	2.303	1.710	hypothetical protein F2Q70_00034050 [Brassica cretica]
BolC1t00579H	82.506	58.409	85.205	47.598	45.182	47.106	33.946	29.590	35.769	PREDICTED: ctenidin-1-like [Brassica oleracea var. oleracea]
BolC1t00580H	0.000	0.000	0.000	0.000	0.000	0.000	0.000	0.000	0.000	PREDICTED: ctenidin-1-like [Brassica oleracea var. oleracea]
BolC1t00581H	0.000	0.000	0.000	0.000	0.000	0.352	0.000	0.000	0.000	unnamed protein product [Brassica oleracea]
BolC1t00582H	0.000	0.000	0.000	0.000	0.000	0.000	0.000	0.000	0.000	hypothetical protein F2Q70_00034050 [Brassica cretica]
BolC1t00583H	0.000	0.000	0.000	0.000	0.000	0.000	0.000	0.000	0.000	unnamed protein product [Brassica oleracea]
BolC1t00584H	0.484	1.568	1.467	0.702	0.705	0.972	1.378	0.156	1.667	PREDICTED: uncharacterized protein LOC103850180 isoform X3 [Brassica rapa]
BolC1t00585H	0.000	0.000	0.000	0.000	0.000	0.000	0.000	0.000	0.000	unnamed protein product, partial [Brassica oleracea]
BolC1t00586H	0.000	2.080	1.167	0.372	0.000	0.344	0.000	0.000	0.000	unnamed protein product [Brassica oleracea]
BolC1t00587H	0.000	0.230	0.000	0.000	0.414	0.000	0.608	0.000	0.000	PREDICTED: uncharacterized protein LOC103850180 isoform X3 [Brassica rapa]
BolC1t00588H	334.375	386.884	318.871	207.366	214.123	191.669	96.288	181.595	78.062	unnamed protein product [Brassica rapa]
BolC1t00589H	0.000	0.000	0.000	0.000	0.000	0.000	0.000	0.000	0.000	BnaCnng32070D, partial [Brassica napus]
BolC1t00590H	0.000	0.000	0.000	0.000	0.000	0.294	0.000	0.284	0.302	unnamed protein product [Brassica oleracea]
BolC1t00591H	0.000	0.000	0.000	0.000	0.000	0.000	0.000	0.000	0.000	unnamed protein product, partial [Brassica rapa]
BolC1t00592H	5.877	8.199	8.435	9.041	9.906	9.195	3.684	10.068	8.971	homeobox-leucine zipper protein ATHB-8-like [Brassica napus]
BolC1t00593H	0.514	0.832	0.097	2.327	1.589	1.289	1.462	2.075	0.796	lachrymatory-factor synthase-like [Brassica napus]
BolC1t00594H	0.000	0.000	0.082	0.393	0.158	0.291	0.000	0.210	0.598	PREDICTED: uncharacterized protein LOC108840693 [Raphanus sativus]
BolC1t00595H	0.000	0.000	0.000	0.000	0.000	0.000	0.000	0.000	0.000	unnamed protein product [Brassica rapa]
BolC1t00596H	1.003	0.406	0.570	0.000	0.000	0.000	0.178	0.000	0.173	BnaC03g15860D [Brassica napus]
BolC1t00597H	43.470	39.273	47.491	41.371	38.360	34.299	51.836	53.397	50.670	nuclear poly(A) polymerase 4-like [Brassica napus]
BolC1t00598H	123.768	94.675	84.124	44.606	33.298	23.546	5.104	5.925	6.593	PREDICTED: ATP-dependent 6-phosphofructokinase 6-like [Raphanus sativus]
BolC1t00599H	1.534	0.989	1.307	25.630	32.905	22.854	1.125	4.598	2.375	serine/threonine-protein kinase Aurora-1 [Brassica napus]
BolC1t00600H	4.364	4.839	4.129	6.601	6.362	5.358	5.514	6.369	5.074	PREDICTED: calcineurin-binding protein cabin-1 isoform X2 [Brassica oleracea var. oleracea]
BolC1t00601H	0.049	0.060	0.000	0.484	0.405	0.298	0.079	0.455	0.740	PREDICTED: carotenoid cleavage dioxygenase 8, chloroplastic [Brassica rapa]
BolC1t00602H	0.000	0.000	0.000	0.000	0.000	0.000	0.000	0.000	0.000	unnamed protein product [Brassica oleracea]
BolC1t00603H	0.000	0.000	0.000	0.000	0.000	0.000	0.000	0.000	0.000	PREDICTED: YTH domain-containing family protein 2-like isoform X1 [Brassica oleracea var. oleracea]
BolC1t00604H	0.000	0.322	0.000	0.000	0.289	0.000	0.283	0.000	0.000	PREDICTED: F-box/kelch-repeat protein At4g39550-like [Raphanus sativus]
BolC1t00605H	0.176	0.000	0.399	4.579	2.299	7.225	2.529	4.168	1.722	shikimate kinase 2, chloroplastic-like [Brassica napus]
BolC1t00606H	0.000	0.000	0.000	0.000	0.000	0.000	0.000	0.000	0.000	PREDICTED: uncharacterized protein LOC103853796 [Brassica rapa]
BolC1t00607H	0.878	2.487	0.665	0.954	2.555	1.762	5.933	0.567	3.927	PREDICTED: thioredoxin-like protein HCF164, chloroplastic [Raphanus sativus]
BolC1t00608H	1.034	3.396	0.691	7.533	6.702	3.296	44.640	18.676	17.889	PREDICTED: ethylene-responsive transcription factor ERF043-like isoform X2 [Brassica oleracea var. oleracea]
BolC1t00609H	0.197	0.478	0.112	7.061	4.441	4.183	1.401	3.148	6.132	PREDICTED: VAN3-binding protein [Raphanus sativus]
BolC1t00610H	2.107	1.705	1.595	3.053	1.724	2.115	4.871	4.933	10.875	hypothetical protein F2Q68_00029015 [Brassica cretica]
BolC1t00611H	0.759	0.645	1.121	1.980	1.740	0.991	4.051	3.016	6.584	unnamed protein product [Brassica rapa]
BolC1t00612H	39.612	33.578	31.014	19.327	17.202	13.530	21.392	25.470	29.178	TOM1-like protein 9 isoform X1 [Brassica napus]
BolC1t00613H	0.000	0.000	0.226	0.000	0.000	0.000	0.000	0.000	0.000	chalcone synthase [Glycyrrhiza uralensis]
BolC1t00614H	0.897	0.720	0.708	3.287	3.583	3.387	1.606	1.974	1.679	PREDICTED: myb-related protein 3R-1 [Raphanus sativus]
BolC1t00615H	125.226	151.318	146.343	47.517	40.955	36.328	25.026	32.083	31.689	la protein 1-like [Brassica napus]
BolC1t00616H	0.000	0.000	0.000	0.000	0.000	0.000	0.000	0.000	0.000	unnamed protein product [Brassica oleracea]
BolC1t00617H	0.000	0.000	0.000	0.000	0.000	0.000	0.000	0.000	0.000	unnamed protein product [Brassica oleracea]
BolC1t00618H	0.000	0.000	0.000	0.000	0.000	0.000	0.000	0.000	0.000	unnamed protein product [Brassica oleracea]
BolC1t00619H	1.117	2.059	1.178	4.705	4.550	4.606	2.534	2.977	2.513	proline-rich receptor-like protein kinase PERK14 [Brassica napus]
BolC1t00620H	123.944	92.684	78.881	55.788	38.472	29.957	14.014	15.378	16.674	PREDICTED: two-on-two hemoglobin-3 [Raphanus sativus]
BolC1t00621H	5.720	5.209	5.743	3.330	2.620	3.947	3.979	3.415	5.536	unnamed protein product [Brassica rapa]
BolC1t00622H	0.687	0.199	0.930	0.000	0.000	0.033	0.000	0.000	0.000	PREDICTED: probable E3 ubiquitin ligase SUD1 [Raphanus sativus]
BolC1t00623H	0.000	0.000	0.000	0.000	0.000	0.000	0.000	0.000	0.000	PREDICTED: probable E3 ubiquitin ligase SUD1 [Raphanus sativus]
BolC1t00624H	0.172	0.163	0.131	0.000	0.063	0.000	0.020	0.037	0.158	PREDICTED: probable E3 ubiquitin ligase SUD1 [Raphanus sativus]
BolC1t00625H	36.819	37.355	36.021	23.565	19.016	17.525	21.111	19.271	17.770	PREDICTED: serine/threonine-protein kinase AFC3 [Raphanus sativus]
BolC1t00626H	1.012	0.418	1.028	5.759	3.244	1.449	1.080	0.793	3.225	potassium channel KAT3 [Brassica napus]
BolC1t00627H	81.799	70.278	69.472	44.011	40.636	32.779	20.749	24.318	22.343	protein transport protein Sec24-like At4g32640 isoform X2 [Brassica napus]
BolC1t00628H	0.000	0.000	0.026	0.000	0.000	0.000	0.000	0.000	0.000	PREDICTED: probable ADP-ribosylation factor GTPase-activating protein AGD14 isoform X1 [Brassica rapa]
BolC1t00629H	7.451	9.365	10.412	6.334	6.351	5.280	8.141	7.003	7.818	uncharacterized protein LOC106366876 isoform X1 [Brassica napus]
BolC1t00630H	96.293	108.115	96.961	40.852	34.262	26.721	40.654	40.383	48.710	claspin-like [Brassica napus]
BolC1t00631H	55.747	57.517	48.345	17.004	14.185	12.366	7.165	8.774	7.695	unnamed protein product [Brassica rapa]
BolC1t00632H	19.649	14.218	18.036	19.215	18.641	15.470	18.335	14.870	20.871	PREDICTED: LOW QUALITY PROTEIN: E3 ubiquitin-protein ligase At1g63170 [Brassica rapa]
BolC1t00633H	5.214	8.680	5.062	26.140	35.061	61.539	86.070	75.544	52.267	photosynthetic NDH subunit of subcomplex B 3, chloroplastic-like [Brassica napus]
BolC1t00634H	26.697	23.608	23.808	14.530	14.591	14.097	7.517	6.989	3.788	protein TIFY 8-like [Brassica napus]
BolC1t00635H	0.000	0.234	0.219	0.000	0.000	0.000	0.000	0.186	0.000	uncharacterized protein LOC106375350 [Brassica napus]
BolC1t00636H	16.425	16.764	14.438	12.469	10.911	9.080	7.520	8.627	9.830	coiled-coil domain-containing protein 93-like [Brassica napus]
BolC1t00637H	22.027	21.499	20.553	13.013	13.674	13.028	17.166	18.044	18.341	PREDICTED: transcriptional corepressor LEUNIG isoform X1 [Brassica oleracea var. oleracea]
BolC1t00638H	8.213	5.492	4.934	4.527	4.351	4.301	13.337	9.746	7.250	tobamovirus multiplication protein 1-like [Brassica napus]
BolC1t00639H	0.000	0.000	0.038	0.036	0.000	0.067	0.000	0.000	0.069	PREDICTED: probable indole-3-pyruvate monooxygenase YUCCA1 [Raphanus sativus]
BolC1t00640H	0.481	0.537	0.415	0.941	0.609	0.406	0.821	0.783	1.152	PREDICTED: LOW QUALITY PROTEIN: WD repeat-containing protein 75-like [Raphanus sativus]
BolC1t00641H	0.000	0.000	0.112	0.427	0.429	0.099	0.839	0.761	0.811	unknown [Arabidopsis thaliana]
BolC1t00642H	0.000	0.000	0.000	0.000	0.000	0.000	0.000	0.000	0.063	protein ECERIFERUM 26-like [Brassica napus]
BolC1t00643H	157.647	152.712	135.858	184.276	175.235	130.916	63.574	76.151	80.887	V-type proton ATPase subunit c''2 [Brassica napus]
BolC1t00644H	29.442	42.794	38.389	9.007	7.607	7.020	2.751	2.800	2.387	PREDICTED: probable boron transporter 7 [Raphanus sativus]
BolC1t00645H	2.955	2.924	3.563	0.594	0.663	0.305	0.410	0.353	0.146	probable potassium channel AKT5 [Brassica napus]
BolC1t00646H	198.451	191.051	168.076	134.516	131.967	116.791	25.224	41.381	33.125	PREDICTED: cytochrome b-c1 complex subunit 7-1 [Camelina sativa]
BolC1t00647H	333.080	369.393	326.834	277.202	315.390	339.187	282.320	421.590	182.193	uncharacterized protein LOC106402077 [Brassica napus]
BolC1t00648H	2.229	2.630	1.772	1.454	2.085	2.014	1.971	2.006	1.808	PREDICTED: pentatricopeptide repeat-containing protein At4g32450, mitochondrial [Brassica oleracea var. oleracea]
BolC1t00649H	2.224	1.942	3.279	6.614	7.153	6.618	19.776	17.730	15.990	uncharacterized protein LOC111203301 isoform X1 [Brassica napus]
BolC1t00650H	2.398	3.772	3.632	1.027	0.932	0.857	0.233	0.299	0.488	PREDICTED: pentatricopeptide repeat-containing protein At4g32430, mitochondrial isoform X1 [Raphanus sativus]
BolC1t00651H	33.021	41.698	34.319	14.446	12.966	12.956	14.499	18.886	18.380	peptidyl-prolyl cis-trans isomerase CYP95-like [Brassica napus]
BolC1t00652H	0.000	0.113	0.000	0.000	0.000	0.000	0.000	0.000	0.000	PREDICTED: adenine nucleotide transporter BT1, chloroplastic/mitochondrial [Brassica rapa]
BolC1t00653H	0.000	0.000	0.000	0.000	0.000	0.000	0.000	0.000	0.000	unnamed protein product [Brassica oleracea]
BolC1t00654H	32.017	31.317	36.617	20.902	15.004	12.461	15.423	16.985	13.696	PREDICTED: adenine nucleotide transporter BT1, chloroplastic/mitochondrial [Camelina sativa]
BolC1t00655H	76.288	60.510	70.785	47.698	40.975	33.882	14.861	20.569	17.177	PREDICTED: probable sugar phosphate/phosphate translocator At4g32390 [Brassica rapa]
BolC1t00656H	0.068	0.041	0.272	0.334	0.485	0.069	0.073	0.364	0.494	probable polygalacturonase At3g15720 [Brassica napus]
BolC1t00657H	6.556	5.828	11.232	7.366	6.863	5.398	3.202	5.513	5.575	hypothetical protein BRARA_A00557 [Brassica rapa]
BolC1t00658H	0.058	0.489	0.131	0.000	0.314	0.058	0.491	0.167	0.357	PREDICTED: zinc finger protein ZIC 2 isoform X2 [Brassica oleracea var. oleracea]
BolC1t00659H	40.034	28.927	28.325	26.711	27.002	20.718	12.222	14.213	14.499	PREDICTED: protein WVD2-like 5 [Raphanus sativus]
BolC1t00660H	0.000	0.000	0.000	0.221	0.555	0.817	0.434	1.085	0.420	G-type lectin S-receptor-like serine/threonine-protein kinase SD2-5 [Brassica napus]
BolC1t00661H	1.570	1.528	2.120	3.043	2.423	1.136	1.570	3.385	2.322	G-type lectin S-receptor-like serine/threonine-protein kinase SD2-5 [Brassica napus]
BolC1t00662H	2.385	3.604	1.204	3.398	2.834	3.298	2.206	2.414	2.736	uncharacterized protein LOC106397745 [Brassica napus]
BolC1t00663H	0.179	0.072	0.068	0.000	0.000	0.000	0.000	0.115	0.000	unnamed protein product [Arabis nemorensis]
BolC1t00664H	94.175	74.268	92.560	81.858	81.349	62.473	45.872	52.573	51.856	probable clathrin assembly protein At4g32285 [Brassica napus]
BolC1t00665H	0.061	0.372	0.209	5.865	10.709	6.649	1.833	5.943	3.039	auxin-responsive protein IAA29-like [Brassica napus]
BolC1t00666H	0.000	0.000	0.000	0.000	0.000	0.000	0.000	0.000	0.000	PREDICTED: putative FBD-associated F-box protein At5g22720 isoform X2 [Raphanus sativus]
BolC1t00667H	0.000	0.000	0.000	0.000	0.000	0.000	0.000	0.000	0.000	PREDICTED: UDP-N-acetylglucosamine/UDP-glucose/GDP-mannose transporter-like [Camelina sativa]
BolC1t00668H	3.540	3.258	2.140	3.599	6.355	4.298	3.717	6.749	8.841	PREDICTED: uncharacterized protein LOC108842906 [Raphanus sativus]
BolC1t00669H	17.476	18.553	12.938	18.445	16.900	14.694	24.704	22.763	24.394	E3 ubiquitin-protein ligase KEG-like [Brassica napus]
BolC1t00670H	17.033	15.239	9.503	17.861	14.675	11.998	22.961	19.690	25.297	unnamed protein product, partial [Brassica rapa]
BolC1t00671H	33.015	41.360	22.618	257.257	318.850	549.223	423.474	391.978	370.384	ATP synthase subunit b', chloroplastic [Capsella rubella]
BolC1t00672H	9.129	13.082	8.878	20.385	20.632	23.854	46.227	38.751	39.587	coiled-coil domain-containing protein 18-like [Brassica napus]
BolC1t00673H	14.111	12.750	13.083	13.723	13.442	13.341	12.790	13.867	13.127	pantothenate kinase 2 isoform X2 [Brassica napus]
BolC1t00674H	20.407	17.736	16.701	13.450	11.623	11.138	24.697	26.016	26.696	PX domain-containing protein EREL1 [Brassica napus]
BolC1t00675H	0.446	0.406	0.253	0.000	0.122	0.112	0.000	0.000	0.000	BnaA05g15480D [Brassica napus]
BolC1t00676H	24.213	19.445	11.332	54.631	41.336	36.105	50.729	58.009	62.197	vesicle-associated membrane protein 711 [Brassica napus]
BolC1t00677H	2.873	2.713	0.725	6.591	5.225	1.922	5.110	3.093	8.568	unnamed protein product [Brassica oleracea]
BolC1t00678H	137.503	105.405	109.003	64.615	64.960	49.744	28.406	38.624	38.251	ER membrane protein complex subunit 7 homolog [Brassica napus]
BolC1t00679H	17.425	12.460	13.621	13.864	14.449	9.735	6.485	9.359	6.689	hydroxyproline O-galactosyltransferase HPGT2-like isoform X2 [Brassica napus]
BolC1t00680H	0.000	0.000	0.000	0.000	0.000	0.000	0.000	0.000	0.000	galactosyltransferase [Arabidopsis lyrata subsp. lyrata]
BolC1t00681H	0.000	0.000	0.000	0.000	0.000	0.000	0.000	0.000	0.000	uncharacterized protein LOC106371339 [Brassica napus]
BolC1t00682H	0.000	0.082	0.000	0.000	0.000	0.000	0.000	0.000	0.000	PREDICTED: uncharacterized protein LOC108808682 [Raphanus sativus]
BolC1t00683H	5.359	9.020	7.844	16.252	15.032	11.204	16.227	21.632	17.056	protein PHOX4-like [Brassica napus]
BolC1t00684H	197.135	109.347	198.445	131.512	120.887	133.769	246.897	221.790	183.981	PREDICTED: calcium uptake protein 1 homolog, mitochondrial isoform X1 [Raphanus sativus]
BolC1t00685H	14.565	14.225	11.097	3.736	3.579	3.019	2.172	2.915	3.199	PREDICTED: neurochondrin [Brassica rapa]
BolC1t00686H	7.435	6.566	4.692	23.915	21.106	13.306	27.933	33.768	36.249	homeobox protein knotted-1-like 5 [Brassica napus]
BolC1t00687H	11.760	11.775	22.661	16.656	11.252	9.286	55.076	21.278	36.191	hypothetical protein DY000_00000354 [Brassica cretica]
BolC1t00688H	170.265	160.703	183.562	135.190	103.896	71.876	211.165	176.183	206.206	PREDICTED: serine/arginine repetitive matrix protein 1-like [Raphanus sativus]
BolC1t00689H	0.000	0.129	0.000	0.000	0.000	0.000	0.000	0.000	0.000	PREDICTED: B3 domain-containing transcription repressor VAL2-like [Raphanus sativus]
BolC1t00690H	71.906	62.918	55.612	79.645	87.977	89.429	22.996	27.700	25.688	PREDICTED: aspartate aminotransferase, chloroplastic [Brassica oleracea var. oleracea]
BolC1t00691H	58.724	65.067	57.250	33.194	30.358	26.005	11.835	12.905	14.406	PREDICTED: deSI-like protein At4g17486 [Raphanus sativus]
BolC1t00692H	0.000	0.000	0.000	0.000	0.000	0.000	0.000	0.000	0.000	PREDICTED: uncharacterized protein At2g39795, mitochondrial, partial [Raphanus sativus]
BolC1t00693H	2.310	2.490	1.238	2.313	3.202	2.085	5.347	5.107	3.055	PREDICTED: two-component response regulator ARR10-like isoform X3 [Brassica oleracea var. oleracea]
BolC1t00694H	0.034	0.028	0.026	0.000	0.013	0.000	0.000	0.000	0.000	PREDICTED: CHD3-type chromatin-remodeling factor PICKLE-like [Tarenaya hassleriana]
BolC1t00695H	0.000	0.000	0.019	0.000	0.000	0.000	0.000	0.000	0.000	CHD3-type chromatin-remodeling factor PICKLE-like [Brassica napus]
BolC1t00696H	10.994	5.974	13.361	11.380	11.668	7.311	0.997	3.462	0.993	PREDICTED: U-box domain-containing protein 14 [Raphanus sativus]
BolC1t00697H	26.433	25.038	28.738	11.525	11.053	9.894	9.465	10.384	11.212	DNA ligase 1-like isoform X1 [Brassica napus]
BolC1t00698H	19.770	19.152	21.964	46.260	49.049	54.872	112.527	124.891	69.820	unnamed protein product [Brassica rapa]
BolC1t00699H	1.051	1.876	0.935	3.881	5.667	7.869	7.636	7.719	8.825	pentatricopeptide repeat-containing protein At4g31850, chloroplastic-like [Brassica napus]
BolC1t00700H	0.000	0.000	0.000	22.177	29.483	24.297	1.322	2.882	2.473	early nodulin-like protein 1 [Brassica napus]
BolC1t00701H	0.973	1.857	1.737	0.000	0.000	0.279	0.148	0.000	10.049	hypothetical protein EUTSA_v10026655mg [Eutrema salsugineum]
BolC1t00702H	0.000	0.135	0.084	0.040	0.000	0.037	0.040	0.000	0.000	hypothetical protein F2Q68_00017248 [Brassica cretica]
BolC1t00703H	12.255	10.178	10.467	10.229	10.272	9.718	13.079	11.780	12.880	BTB/POZ domain-containing protein NPY1 [Brassica napus]
BolC1t00704H	0.145	0.000	0.164	0.157	0.316	0.145	0.155	0.421	0.299	unnamed protein product [Brassica oleracea]
BolC1t00705H	0.413	2.508	0.469	0.000	0.451	0.000	0.661	0.200	2.345	unnamed protein product [Brassica oleracea]
BolC1t00706H	2.765	7.674	4.038	2.146	0.910	0.793	10.726	5.571	7.612	WRKY transcription factor 18-like [Brassica napus]
BolC1t00707H	0.154	0.000	0.526	0.000	0.000	0.000	0.000	0.000	0.000	BnaC04g40310D [Brassica napus]
BolC1t00708H	28.999	34.290	36.035	11.310	9.428	9.077	4.205	6.021	5.633	PREDICTED: probable diphthine methyl ester synthase [Brassica oleracea var. oleracea]
BolC1t00709H	13.124	16.159	12.935	16.750	20.667	26.875	21.135	15.674	15.233	monogalactosyldiacylglycerol synthase 1, chloroplastic-like isoform X1 [Brassica napus]
BolC1t00710H	15.630	13.147	17.804	12.752	10.532	8.686	7.784	7.375	10.383	PREDICTED: probable protein phosphatase 2C 59 isoform X1 [Brassica oleracea var. oleracea]
BolC1t00711H	109.817	72.657	95.710	68.361	68.241	53.840	39.464	40.176	31.004	ADP-ribosylation factor 3 [Arabidopsis lyrata subsp. lyrata]
BolC1t00712H	1.766	1.021	2.101	16.817	13.951	7.091	0.628	11.002	8.943	protein GLUTAMINE DUMPER 1-like [Brassica napus]
BolC1t00713H	85.195	74.970	72.309	51.334	45.983	45.551	104.140	123.318	99.786	PREDICTED: transcription initiation factor TFIID subunit 10 [Raphanus sativus]
BolC1t00714H	0.000	0.000	0.000	0.000	0.000	0.046	0.000	0.000	0.000	PREDICTED: indole glucosinolate O-methyltransferase 4-like [Brassica rapa]
BolC1t00715H	0.000	0.000	0.000	0.000	0.000	0.000	0.000	0.000	0.000	unnamed protein product [Brassica rapa]
BolC1t00716H	279.538	344.657	328.376	98.940	76.803	65.654	15.898	21.143	19.730	PREDICTED: 40S ribosomal protein S6-1-like [Raphanus sativus]
BolC1t00717H	0.019	0.000	0.000	0.080	0.101	0.019	0.000	0.018	0.000	PREDICTED: B3 domain-containing protein REM8-like [Raphanus sativus]
BolC1t00718H	0.000	0.000	0.031	0.088	0.059	0.027	0.346	0.602	0.781	PREDICTED: putative B3 domain-containing protein REM4 isoform X1 [Brassica oleracea var. oleracea]
BolC1t00719H	0.000	0.000	0.000	46.334	28.010	13.209	7.145	15.324	30.151	PREDICTED: feruloyl CoA ortho-hydroxylase 1-like [Brassica oleracea var. oleracea]
BolC1t00720H	0.053	0.128	0.030	0.057	0.000	0.080	0.000	0.077	0.055	B3 domain-containing protein REM1-like [Brassica napus]
BolC1t00721H	0.000	0.040	0.037	0.143	0.215	0.132	0.385	0.731	0.881	PREDICTED: B3 domain-containing protein REM3-like isoform X1 [Brassica rapa]
BolC1t00722H	0.000	0.000	0.000	0.000	0.000	0.000	0.000	0.000	0.000	uncharacterized protein LOC106420880 [Brassica napus]
BolC1t00723H	0.000	0.105	0.000	0.094	0.063	0.493	0.339	0.448	0.239	B3 domain-containing protein REM1-like [Brassica napus]
BolC1t00724H	11.007	12.736	9.457	22.837	22.367	15.550	9.725	13.990	9.353	PREDICTED: probable xyloglucan glycosyltransferase 5 [Brassica oleracea var. oleracea]
BolC1t00725H	4.985	5.011	5.738	5.084	4.737	3.417	3.256	3.858	3.526	centromere-associated protein E-like isoform X3 [Brassica napus]
BolC1t00726H	17.503	20.744	13.809	23.579	27.224	36.401	41.162	56.164	37.114	unknown [Arabidopsis thaliana]
BolC1t00727H	0.000	0.000	0.000	0.000	0.000	0.000	0.000	0.000	0.000	BnaC03g40950D [Brassica napus]
BolC1t00728H	34.493	29.493	81.116	33.264	24.692	23.567	43.097	48.770	48.214	probable WRKY transcription factor 11 isoform X1 [Brassica napus]
BolC1t00729H	6.557	9.468	6.437	3.394	3.386	3.177	4.459	4.650	5.296	PREDICTED: exocyst complex component EXO70A1-like [Brassica rapa]
BolC1t00730H	11.130	14.211	12.039	4.656	2.024	2.394	21.163	20.842	4.924	PREDICTED: cytochrome P450 71B2-like isoform X1 [Brassica rapa]
BolC1t00731H	3.146	4.366	3.446	3.297	2.820	3.722	49.641	37.670	10.324	hypothetical protein ARALYDRAFT_353622 [Arabidopsis lyrata subsp. lyrata]
BolC1t00732H	0.572	0.198	0.464	0.000	0.000	0.082	1.307	0.158	0.337	PREDICTED: coatomer subunit beta-1 [Raphanus sativus]
BolC1t00733H	16.165	20.378	20.817	2.832	2.073	1.286	10.463	12.411	2.781	PREDICTED: cytochrome P450 71B2-like isoform X1 [Brassica rapa]
BolC1t00734H	87.071	83.968	92.017	61.839	59.765	52.648	31.133	36.599	32.504	PREDICTED: coatomer subunit beta-1 [Raphanus sativus]
BolC1t00735H	54.150	51.283	62.885	34.329	32.260	26.465	17.640	22.600	20.100	PREDICTED: coatomer subunit beta-1-like [Raphanus sativus]
BolC1t00736H	64.091	68.453	69.423	29.739	26.050	22.768	8.514	9.648	8.237	PREDICTED: uncharacterized protein LOC103834609 [Brassica rapa]
BolC1t00737H	0.000	0.000	0.000	0.000	0.000	0.000	0.000	0.000	0.000	PREDICTED: cysteine proteinase 1-like [Raphanus sativus]
BolC1t00738H	0.000	0.000	0.000	0.000	0.000	0.000	0.000	0.000	0.000	predicted protein [Arabidopsis lyrata subsp. lyrata]
BolC1t00739H	0.000	0.000	0.000	0.000	0.000	0.000	0.000	0.000	0.000	PREDICTED: LOW QUALITY PROTEIN: UPF0725 protein At2g20620-like [Brassica oleracea var. oleracea]
BolC1t00740H	0.000	0.000	0.000	0.000	0.000	0.000	0.000	0.000	0.000	protein KAKU4-like [Brassica napus]
BolC1t00741H	2.745	3.018	3.775	2.293	2.586	2.640	2.961	3.780	3.849	unnamed protein product [Brassica oleracea]
BolC1t00742H	19.321	18.592	16.598	8.433	9.005	8.827	13.166	13.083	15.060	PREDICTED: protein KAKU4 isoform X1 [Brassica rapa]
BolC1t00743H	31.592	30.190	25.208	19.032	18.620	20.433	25.091	26.244	25.956	cytoplasmic 60S subunit biogenesis factor REI1 homolog 1-like [Brassica napus]
BolC1t00744H	14.791	12.257	13.958	14.930	17.196	14.714	16.581	17.352	17.263	unnamed protein product [Brassica oleracea]
BolC1t00745H	20.303	19.210	12.808	9.113	9.715	12.854	33.702	32.622	35.758	PREDICTED: uncharacterized aarF domain-containing protein kinase At4g31390, chloroplastic [Raphanus sativus]
BolC1t00746H	0.000	0.000	0.000	0.244	0.858	2.368	11.151	11.541	11.716	flowering-promoting factor 1-like protein 1 [Eutrema salsugineum]
BolC1t00747H	51.335	72.623	65.182	22.456	25.370	22.281	9.734	20.570	14.249	PREDICTED: selenoprotein H isoform X1 [Brassica rapa]
BolC1t00748H	21.719	25.467	20.902	21.660	25.573	24.830	29.221	27.724	24.999	glycosyltransferase, partial [Arabidopsis thaliana]
BolC1t00749H	0.000	0.000	0.173	0.000	0.000	0.000	0.000	0.000	0.000	unnamed protein product [Brassica oleracea]
BolC1t00750H	0.064	0.156	0.073	0.000	0.000	0.000	0.000	0.000	0.000	unnamed protein product [Arabis nemorensis]
BolC1t00751H	115.230	104.683	99.698	86.585	75.071	58.825	83.968	63.283	60.667	PREDICTED: uncharacterized protein LOC103851944 [Brassica rapa]
BolC1t00752H	0.000	0.000	0.000	0.000	0.000	0.000	0.000	0.000	0.000	unnamed protein product [Brassica oleracea]
BolC1t00753H	0.000	0.000	0.000	0.923	0.618	0.171	0.544	0.604	0.877	unnamed protein product [Brassica oleracea]
BolC1t00754H	0.000	0.000	0.000	0.000	0.000	0.000	0.000	0.000	0.000	unnamed protein product [Brassica rapa]
BolC1t00755H	36.858	14.797	22.282	11.952	4.298	1.566	0.317	0.720	2.148	auxin-responsive protein SAUR63-like [Brassica napus]
BolC1t00756H	68.242	62.237	50.104	61.249	68.909	57.956	22.995	30.534	28.193	proteasome subunit beta type-6-like [Brassica napus]
BolC1t00757H	81.496	61.257	60.308	15.799	9.210	10.573	20.707	19.101	11.383	PREDICTED: gamma-glutamylcyclotransferase 2-2 [Raphanus sativus]
BolC1t00758H	0.000	0.000	0.000	0.000	0.000	0.000	0.000	0.000	0.000	probable LRR receptor-like serine/threonine-protein kinase At4g31250 [Brassica napus]
BolC1t00759H	0.000	0.000	0.000	0.000	0.000	0.000	0.000	0.000	0.000	unnamed protein product, partial [Brassica oleracea]
BolC1t00760H	0.000	0.000	0.000	0.335	0.337	0.077	0.000	0.000	0.000	probable LRR receptor-like serine/threonine-protein kinase At4g31250 [Brassica napus]
BolC1t00761H	0.000	0.000	0.128	0.488	0.245	0.338	0.000	0.000	0.000	unnamed protein product, partial [Brassica oleracea]
BolC1t00762H	0.704	1.073	1.071	2.067	1.029	0.872	0.447	0.711	0.680	probable LRR receptor-like serine/threonine-protein kinase At4g31250 [Brassica napus]
BolC1t00763H	5.539	9.546	8.808	2.486	1.794	2.654	1.792	2.563	3.726	predicted protein [Arabidopsis lyrata subsp. lyrata]
BolC1t00764H	10.403	13.758	12.237	6.680	5.696	7.823	17.006	16.486	11.758	hypothetical protein BRARA_A00644 [Brassica rapa]
BolC1t00765H	12.589	14.197	9.083	7.668	5.500	6.183	4.518	5.643	6.452	PREDICTED: calcium homeostasis endoplasmic reticulum protein [Brassica rapa]
BolC1t00766H	123.164	156.976	148.834	62.051	56.999	48.024	21.054	24.600	24.552	PREDICTED: aspartate--tRNA ligase 2, cytoplasmic-like [Raphanus sativus]
BolC1t00767H	13.264	11.534	14.218	18.913	16.475	11.850	19.695	20.151	21.014	PREDICTED: serine/threonine-protein kinase HT1-like [Raphanus sativus]
BolC1t00768H	6.007	8.280	5.504	17.313	15.993	11.563	26.880	24.969	26.123	PREDICTED: glucan endo-1,3-beta-glucosidase 5 [Brassica rapa]
BolC1t00769H	41.417	28.451	43.948	45.167	35.582	26.541	29.747	33.815	35.657	unnamed protein product [Brassica oleracea]
BolC1t00770H	0.624	0.568	0.354	2.544	0.852	2.819	4.996	6.653	3.705	PREDICTED: protein arginine N-methyltransferase 1.5-like [Brassica oleracea var. oleracea]
BolC1t00771H	0.988	1.460	1.122	2.287	1.687	2.328	4.721	3.746	2.882	PREDICTED: protein arginine N-methyltransferase 1.5 isoform X2 [Camelina sativa]
BolC1t00772H	0.000	0.000	0.000	0.000	0.000	0.000	0.000	0.000	0.000	unnamed protein product [Brassica oleracea]
BolC1t00773H	0.000	0.000	0.000	0.000	0.000	0.000	0.000	0.000	0.000	PREDICTED: glutathione S-transferase T3-like [Brassica oleracea var. oleracea]
BolC1t00774H	0.106	0.301	0.141	0.385	0.348	0.142	0.322	0.395	0.568	PREDICTED: wall-associated receptor kinase-like 18 [Brassica rapa]
BolC1t00775H	2.463	2.785	2.894	1.631	1.267	1.165	0.786	0.823	0.614	PREDICTED: plastidial lipoyltransferase 2-like isoform X1 [Brassica oleracea var. oleracea]
BolC1t00776H	6.571	11.812	6.915	22.195	20.495	23.086	26.264	28.748	32.624	PREDICTED: chloroplast envelope membrane protein [Raphanus sativus]
BolC1t00777H	0.333	0.116	1.027	1.397	1.663	2.485	6.097	5.767	2.654	protein ABHD17C-like [Brassica napus]
BolC1t00778H	3.468	2.526	11.422	9.233	8.515	4.525	14.433	9.913	15.215	calmodulin-binding protein 60 F-like isoform X1 [Brassica napus]
BolC1t00779H	125.184	85.365	103.916	81.170	71.322	50.604	35.088	40.592	24.808	PREDICTED: uncharacterized protein LOC108842469 [Raphanus sativus]
BolC1t00780H	0.769	1.145	1.296	0.593	0.569	0.548	0.344	0.433	0.435	lysosomal Pro-X carboxypeptidase-like [Brassica napus]
BolC1t00781H	9.723	7.871	12.621	8.722	8.085	9.450	4.118	5.234	4.621	unnamed protein product [Brassica oleracea]
BolC1t00782H	2.996	3.279	3.960	29.139	34.246	25.237	36.422	38.401	34.069	BnaA01g06160D [Brassica napus]
BolC1t00783H	14.259	13.570	12.158	8.004	7.851	6.189	10.739	7.759	10.565	transcription factor bHLH69-like [Brassica napus]
BolC1t00784H	0.000	0.000	0.000	0.000	0.000	0.000	0.000	0.000	0.000	PREDICTED: uncharacterized protein LOC103870759 [Brassica rapa]
BolC1t00785H	0.000	0.000	0.000	0.000	0.000	0.000	0.000	0.000	0.000	uncharacterized protein LOC106392550 [Brassica napus]
BolC1t00786H	0.000	0.000	0.000	0.000	0.000	0.000	0.000	0.000	0.000	uncharacterized protein LOC106383756 [Brassica napus]
BolC1t00787H	291.092	275.282	234.619	242.799	227.002	149.172	278.300	169.962	212.505	AT4g30960/F6I18_130 [Arabidopsis thaliana]
BolC1t00788H	0.000	0.000	0.000	0.332	0.000	0.000	0.000	0.000	0.000	Very similar to retrotransposon reverse transcriptase [Arabidopsis thaliana]
BolC1t00789H	11.172	14.970	8.927	17.431	16.329	20.786	14.520	11.521	12.028	PREDICTED: omega-6 fatty acid desaturase, chloroplastic [Brassica rapa]
BolC1t00790H	0.000	0.000	0.000	0.000	0.000	0.000	0.000	0.000	0.000	hypothetical protein EUTSA_v10002802mg, partial [Eutrema salsugineum]
BolC1t00791H	27.005	32.855	31.903	9.901	8.226	7.239	0.926	3.468	2.183	PREDICTED: 50S ribosomal protein L21, mitochondrial [Raphanus sativus]
BolC1t00792H	33.558	47.357	33.463	82.993	114.997	140.177	35.273	38.867	29.049	PREDICTED: leucine aminopeptidase 2, chloroplastic [Raphanus sativus]
BolC1t00793H	14.740	14.572	12.840	17.673	18.744	12.090	18.933	19.213	18.584	PREDICTED: uncharacterized protein LOC106308485 [Brassica oleracea var. oleracea]
BolC1t00794H	36.972	36.337	37.370	21.379	18.982	15.428	15.559	15.367	15.292	PREDICTED: ubiquitin carboxyl-terminal hydrolase 24 [Brassica rapa]
BolC1t00795H	0.000	0.000	0.000	0.145	0.000	0.000	0.000	0.000	0.000	seed specific protein Bn15D18B [Brassica napus]
BolC1t00796H	0.196	0.476	0.713	5.031	2.655	1.733	5.066	2.585	10.935	PREDICTED: heptahelical transmembrane protein 2 [Brassica rapa]
BolC1t00797H	0.048	0.116	0.000	0.000	0.104	0.000	0.203	0.046	0.590	PREDICTED: myosin-binding protein 7-like isoform X1 [Brassica rapa]
BolC1t00798H	1.867	2.965	1.341	7.077	8.604	11.871	5.587	5.181	5.091	pentatricopeptide repeat-containing protein At4g30825, chloroplastic-like [Brassica napus]
BolC1t00799H	0.052	0.032	0.059	0.028	0.028	0.026	0.000	0.051	0.000	serine carboxypeptidase-like 29 [Brassica napus]
BolC1t00800H	116.465	176.440	136.615	93.955	99.503	115.207	110.111	115.086	111.182	serine carboxypeptidase-like 29 [Brassica napus]
BolC1t00801H	3.386	4.051	3.889	6.043	5.823	5.757	7.294	7.168	8.952	autophagy-related protein 11 [Brassica napus]
BolC1t00802H	9.917	11.567	14.176	12.131	9.890	9.169	17.960	13.538	16.971	PREDICTED: uncharacterized protein LOC106304358 [Brassica oleracea var. oleracea]
BolC1t00803H	0.000	0.000	0.000	0.000	0.000	0.000	0.000	0.000	0.188	hypothetical protein EUTSA_v10027257mg [Eutrema salsugineum]
BolC1t00804H	2.535	3.185	2.543	1.715	1.335	1.346	3.431	1.367	2.047	pentatricopeptide repeat-containing protein At4g30700-like isoform X2 [Brassica napus]
BolC1t00805H	1.350	0.820	0.000	1.027	0.737	1.627	5.332	3.926	5.158	Translation initiation factor 3 protein [Arabidopsis thaliana]
BolC1t00806H	46.304	71.687	62.235	19.003	17.165	15.130	9.400	9.351	7.472	PREDICTED: eukaryotic translation initiation factor-like [Brassica rapa]
BolC1t00807H	4.392	7.131	4.931	7.493	6.243	6.100	1.254	2.425	2.056	PREDICTED: uncharacterized protein LOC108842075 [Raphanus sativus]
BolC1t00808H	0.702	0.000	0.000	0.000	0.000	0.000	0.000	0.000	0.000	unnamed protein product [Brassica oleracea]
BolC1t00809H	0.000	0.000	0.000	1.120	0.281	0.000	0.000	0.000	0.000	unnamed protein product [Brassica oleracea]
BolC1t00810H	4.745	5.070	6.898	9.591	8.492	5.525	1.519	6.897	1.861	PREDICTED: uncharacterized protein LOC108839042 [Raphanus sativus]
BolC1t00811H	23.837	36.453	19.464	40.049	34.733	25.867	44.965	23.348	42.168	PREDICTED: UPF0057 membrane protein At4g30660-like [Raphanus sativus]
BolC1t00812H	17.228	18.190	9.358	179.905	237.885	133.456	127.100	67.502	80.230	cold and salt response protein [Brassica napus]
BolC1t00813H	9.091	6.483	8.905	20.229	16.325	10.139	5.236	6.106	4.767	putative F-box/LRR-repeat protein 19 [Brassica napus]
BolC1t00814H	0.000	0.000	0.000	0.000	0.000	0.000	0.000	0.000	0.000	PREDICTED: pentatricopeptide repeat-containing protein At1g12620-like [Brassica oleracea var. oleracea]
BolC1t00815H	0.081	0.000	0.092	0.000	0.000	0.000	0.000	0.000	0.000	unnamed protein product [Brassica oleracea]
BolC1t00816H	0.071	0.000	0.000	0.000	0.000	0.000	0.000	0.000	0.000	pentatricopeptide repeat-containing protein [Populus alba]
BolC1t00817H	0.000	0.000	0.000	0.043	0.000	0.000	0.000	0.000	0.000	putative F-box/LRR-repeat protein 19 [Brassica napus]
BolC1t00818H	7.056	5.520	6.473	8.627	7.923	4.835	17.740	10.782	12.748	hypothetical protein F2Q70_00034209 [Brassica cretica]
BolC1t00819H	69.531	42.186	78.186	34.240	30.680	21.964	60.858	41.044	45.919	PREDICTED: signal recognition particle receptor subunit alpha-like [Raphanus sativus]
BolC1t00820H	40.735	55.100	76.326	74.858	76.333	59.030	240.708	84.746	53.665	PREDICTED: gamma-glutamyl peptidase 1 [Raphanus sativus]
BolC1t00821H	0.070	0.197	0.290	0.151	0.126	0.186	0.074	0.180	0.311	PREDICTED: probable LRR receptor-like serine/threonine-protein kinase At4g30520 isoform X1 [Raphanus sativus]
BolC1t00822H	0.000	0.000	0.000	0.000	0.000	0.000	0.000	0.000	0.000	unnamed protein product [Brassica oleracea]
BolC1t00823H	0.000	0.000	0.000	0.000	0.000	0.000	0.000	0.000	0.000	probable F-box protein At5g47300 [Brassica napus]
BolC1t00824H	0.000	0.000	0.000	0.000	0.000	0.000	0.000	0.000	0.000	unnamed protein product [Brassica oleracea]
BolC1t00825H	3.405	1.698	3.384	4.295	2.588	2.136	1.103	2.121	1.004	PREDICTED: pumilio homolog 5-like isoform X2 [Brassica rapa]
BolC1t00826H	0.000	0.000	0.000	0.000	0.000	0.000	0.000	0.000	0.000	26S proteasome regulatory subunit 4 homolog A [Zea mays]
BolC1t00827H	0.000	0.000	0.000	0.040	0.000	0.000	0.000	0.000	0.000	probable F-box protein At5g47300 [Brassica napus]
BolC1t00828H	0.000	0.000	0.000	0.000	0.000	0.000	0.000	0.000	0.000	unnamed protein product [Brassica oleracea]
BolC1t00829H	0.000	0.000	0.000	0.000	0.000	0.000	0.000	0.000	0.000	unnamed protein product [Brassica oleracea]
BolC1t00830H	0.000	0.000	0.255	0.000	0.000	0.000	0.120	0.000	0.000	unnamed protein product [Brassica oleracea]
BolC1t00831H	0.168	0.000	0.000	0.000	0.275	0.000	0.000	0.000	0.087	PREDICTED: transmembrane protein 208 homolog [Brassica rapa]
BolC1t00832H	0.000	0.000	0.000	0.000	0.000	0.000	0.000	0.000	0.000	unnamed protein product [Brassica oleracea]
BolC1t00833H	0.000	0.000	0.000	0.000	0.000	0.000	0.000	0.000	0.000	probable F-box protein At5g47300 [Brassica napus]
BolC1t00834H	0.184	0.000	0.104	0.200	0.000	0.184	0.196	0.267	0.000	PREDICTED: transmembrane protein 208 homolog [Brassica rapa]
BolC1t00835H	0.000	0.000	0.000	0.000	0.000	0.000	0.000	0.000	0.000	unnamed protein product [Brassica oleracea]
BolC1t00836H	0.077	0.000	0.175	0.000	0.000	0.000	0.000	0.000	0.000	probable F-box protein At5g47300 [Brassica napus]
BolC1t00837H	3.616	4.391	2.483	2.376	2.203	2.195	5.026	3.423	5.383	PREDICTED: transmembrane protein 208 homolog [Brassica rapa]
BolC1t00838H	0.000	0.000	0.000	0.000	0.000	0.000	0.000	0.000	0.000	unnamed protein product [Brassica oleracea]
BolC1t00839H	0.385	0.701	0.219	1.464	1.260	0.966	22.790	4.847	11.719	putative protein [Arabidopsis thaliana]
BolC1t00840H	0.936	0.207	0.580	8.511	4.831	4.187	34.609	20.043	31.723	glycine-rich protein 5-like [Brassica napus]
BolC1t00841H	0.258	0.000	0.000	85.699	62.295	40.611	115.643	105.628	138.343	PREDICTED: lysozyme D-like [Raphanus sativus]
BolC1t00842H	12.869	43.545	36.652	61.799	39.638	29.342	58.280	60.735	108.274	UDP-glucuronate 4-epimerase 1 [Brassica napus]
BolC1t00843H	0.405	0.820	0.460	1.027	0.590	0.678	0.288	0.523	0.139	unnamed protein product [Brassica oleracea]
BolC1t00844H	0.000	0.000	0.000	0.735	0.114	0.104	0.000	0.000	0.000	PREDICTED: tetraspanin-9 [Raphanus sativus]
BolC1t00845H	0.352	0.190	0.533	0.340	0.213	0.196	0.000	0.038	0.000	LOW QUALITY PROTEIN: WAT1-related protein At4g30420 [Arabidopsis lyrata subsp. lyrata]
BolC1t00846H	0.143	0.261	0.326	0.701	0.547	0.575	0.153	0.417	0.370	unnamed protein product [Brassica rapa]
BolC1t00847H	0.931	0.377	0.881	8.180	9.908	5.919	2.236	9.023	3.124	transcription factor IBH1-like 1 [Brassica napus]
BolC1t00848H	2.993	3.202	3.332	5.893	5.271	3.985	3.415	7.580	5.476	PREDICTED: RING-H2 finger protein ATL13-like [Raphanus sativus]
BolC1t00849H	0.000	0.135	0.000	0.000	0.122	0.000	0.238	0.000	0.460	putative EG45-like domain containing protein 1 [Eutrema salsugineum]
BolC1t00850H	0.000	0.000	0.000	0.000	0.000	0.000	0.000	0.000	0.000	ATP-dependent DNA helicase PIF1-like [Brassica napus]
BolC1t00851H	0.000	0.000	0.000	0.000	0.000	0.038	0.041	0.019	0.000	BnaA09g12370D [Brassica napus]
BolC1t00852H	43.943	28.143	15.658	7.679	6.959	6.746	6.345	8.015	7.294	RING-H2 finger protein ATL14-like [Brassica napus]
BolC1t00853H	13.368	12.549	8.689	8.104	7.885	7.252	9.999	10.483	13.004	cyclic nucleotide-gated ion channel 17 [Brassica napus]
BolC1t00854H	0.000	0.000	0.319	0.305	0.000	0.000	0.300	0.000	0.290	unnamed protein product, partial [Brassica oleracea]
BolC1t00855H	0.000	0.000	0.000	0.000	0.000	0.000	0.000	0.000	0.000	unnamed protein product [Brassica oleracea]
BolC1t00856H	0.000	0.000	0.000	0.000	0.000	0.000	0.060	0.000	0.000	BnaC05g26890D [Brassica napus]
BolC1t00857H	3.585	3.508	2.913	5.037	5.531	4.249	8.244	10.750	10.145	protein SMAX1-LIKE 2-like isoform X1 [Brassica napus]
BolC1t00858H	0.000	0.000	0.000	0.000	0.000	0.000	0.000	0.000	0.000	unnamed protein product [Brassica rapa]
BolC1t00859H	27.145	22.784	24.301	22.662	25.411	28.281	16.331	29.796	22.709	diacylglycerol kinase 7-like [Brassica napus]
BolC1t00860H	6.964	5.356	7.383	6.559	6.080	6.874	9.042	6.861	9.946	hypothetical protein DY000_00019724, partial [Brassica cretica]
BolC1t00861H	0.000	0.000	0.000	20.140	9.795	3.337	0.000	0.161	0.429	PREDICTED: pathogenesis-related protein PR-1-like [Camelina sativa]
BolC1t00862H	0.000	0.000	0.000	0.000	0.000	0.000	0.000	0.000	0.000	F-box/kelch-repeat protein At5g39560-like [Brassica napus]
BolC1t00863H	26.997	26.574	32.354	259.262	218.108	64.410	110.902	278.197	174.300	PREDICTED: probable xyloglucan endotransglucosylase/hydrolase protein 17 [Raphanus sativus]
BolC1t00864H	6.538	8.233	9.993	16.755	20.965	22.605	42.467	37.934	28.166	unnamed protein product, partial [Brassica oleracea]
BolC1t00865H	6.819	8.032	9.478	16.369	17.105	22.679	37.796	37.573	27.528	PREDICTED: WRKY transcription factor 18 [Brassica oleracea var. oleracea]
BolC1t00866H	69.727	67.249	368.916	243.298	167.684	57.934	206.764	366.297	363.408	PREDICTED: probable xyloglucan endotransglucosylase/hydrolase protein 18 [Raphanus sativus]
BolC1t00867H	0.000	0.000	0.000	0.000	0.000	0.000	0.000	0.000	0.000	unnamed protein product [Brassica oleracea]
BolC1t00868H	17.320	15.004	13.359	83.868	68.893	41.246	29.394	73.192	55.692	xyloglucan endotransglucosylase/hydrolase protein 24-like [Brassica napus]
BolC1t00869H	51.170	38.809	57.473	43.770	44.687	31.253	40.116	40.628	33.903	protein YIPF6 homolog [Brassica napus]
BolC1t00870H	0.163	0.462	0.401	0.679	0.860	0.327	0.406	1.448	0.617	PREDICTED: AAA-ATPase At4g30250 [Brassica rapa]
BolC1t00871H	0.282	0.218	0.262	0.279	0.504	0.670	0.493	0.597	0.292	PREDICTED: F-box/kelch-repeat protein At4g39560-like isoform X2 [Brassica oleracea var. oleracea]
BolC1t00872H	13.221	11.996	11.166	12.263	11.892	12.591	20.157	22.807	20.749	unnamed protein product [Brassica oleracea]
BolC1t00873H	0.000	0.000	0.000	0.477	1.018	0.881	0.527	0.425	0.906	unnamed protein product [Arabidopsis thaliana]
BolC1t00874H	0.000	0.000	0.000	0.000	0.000	0.000	0.000	0.000	0.000	BnaC06g31790D [Brassica napus]
BolC1t00875H	13.434	10.954	51.971	22.670	18.294	10.281	48.181	36.342	30.707	NADPH--cytochrome P450 reductase 2-like [Brassica napus]
BolC1t00876H	6.540	6.795	3.824	6.292	6.014	6.112	10.824	11.158	13.725	VIN3-like protein 2 isoform X1 [Brassica napus]
BolC1t00877H	641.937	489.996	576.595	427.649	360.935	236.315	192.162	245.483	213.045	PREDICTED: ATPase 2, plasma membrane-type [Raphanus sativus]
BolC1t00878H	0.000	0.000	0.000	4.588	6.112	3.027	11.402	2.505	0.267	transcription factor bHLH146-like [Brassica napus]
BolC1t00879H	0.893	1.228	0.777	37.997	13.054	9.378	6.192	9.947	16.926	PREDICTED: peroxidase 45 [Brassica rapa]
BolC1t00880H	0.000	0.000	0.000	0.000	0.000	0.000	0.000	0.000	0.000	hypothetical protein F2Q68_00029193 [Brassica cretica]
BolC1t00881H	0.000	0.000	0.000	0.000	0.000	0.000	0.000	0.000	0.000	hypothetical protein F2Q68_00029193 [Brassica cretica]
BolC1t00882H	23.523	27.079	25.020	22.474	20.547	15.020	12.291	14.862	12.913	villin-4-like isoform X1 [Brassica napus]
BolC1t00883H	0.000	0.000	0.000	0.000	0.000	0.000	0.000	0.000	0.000	LOW QUALITY PROTEIN: 3-hydroxy-3-methylglutaryl-coenzyme A reductase 1 [Brassica napus]
BolC1t00884H	0.000	0.000	0.000	0.000	0.000	0.000	0.000	0.000	0.000	PREDICTED: uncharacterized protein LOC106306047 [Brassica oleracea var. oleracea]
BolC1t00885H	12.166	17.243	14.847	3.011	2.318	1.610	0.579	0.813	1.043	PREDICTED: uncharacterized protein LOC106306047 [Brassica oleracea var. oleracea]
BolC1t00886H	0.000	0.000	0.000	0.000	0.000	0.000	0.000	0.000	0.000	PREDICTED: LOW QUALITY PROTEIN: GDSL esterase/lipase At4g30140-like [Raphanus sativus]
BolC1t00887H	0.000	0.025	0.024	0.365	0.298	0.105	0.022	0.081	0.130	PREDICTED: uncharacterized protein LOC103852916 [Brassica rapa]
BolC1t00888H	0.148	0.135	0.063	0.101	0.020	0.000	0.000	0.000	0.000	putative cadmium/zinc-transporting ATPase 3 [Arabidopsis halleri subsp. halleri]
BolC1t00889H	0.000	0.000	0.000	0.000	0.000	0.000	0.000	0.000	0.000	BnaC07g48670D [Brassica napus]
BolC1t00890H	0.015	0.056	0.053	0.437	0.338	0.295	0.248	0.210	0.511	heavy metal ATPase 2.1 [Brassica rapa var. rapa]
BolC1t00891H	0.055	0.000	0.126	0.000	0.060	0.056	0.000	0.107	0.057	DNA replication ATP-dependent helicase/nuclease DNA2-like isoform X1 [Brassica napus]
BolC1t00892H	0.000	0.000	0.000	0.355	0.214	0.197	0.000	0.127	0.135	unnamed protein product [Brassica rapa]
BolC1t00893H	4.382	2.050	7.343	0.703	0.549	0.397	0.422	0.418	0.334	uncharacterized protein BNAC01G08320D isoform X4 [Brassica napus]
BolC1t00894H	7.862	5.728	6.875	5.384	5.360	4.151	3.977	6.158	5.804	auxin response factor 16-1 [Brassica rapa subsp. pekinensis]
BolC1t00895H	0.000	0.000	0.000	0.000	0.000	0.000	0.000	0.000	0.000	PREDICTED: putative defensin-like protein 170 [Camelina sativa]
BolC1t00896H	0.000	0.000	0.000	0.000	0.000	0.000	0.000	0.000	0.000	PREDICTED: aspartyl protease UND-like [Raphanus sativus]
BolC1t00897H	12.199	14.460	11.003	24.715	26.721	14.440	6.327	10.596	6.685	PREDICTED: subtilisin-like protease SBT2.6 [Raphanus sativus]
BolC1t00898H	0.584	0.336	0.942	0.434	0.034	0.062	0.033	0.089	0.127	PREDICTED: molybdate transporter 1 [Raphanus sativus]
BolC1t00899H	0.000	0.000	0.148	0.000	0.000	0.000	0.000	0.000	0.000	unnamed protein product [Brassica rapa]
BolC1t00900H	9.685	9.900	7.226	6.479	6.481	6.386	6.212	8.335	7.712	PREDICTED: folate synthesis bifunctional protein, mitochondrial [Brassica rapa]
BolC1t00901H	0.000	0.000	0.000	0.279	0.105	0.016	0.000	0.265	0.050	serine/threonine-specific receptor protein kinase LRRPK [Arabidopsis thaliana]
BolC1t00902H	30.389	25.134	28.068	19.731	20.882	21.466	22.613	22.714	23.239	unnamed protein product [Brassica rapa]
BolC1t00903H	15.794	13.787	23.393	21.720	20.011	14.727	27.370	23.588	17.123	PREDICTED: TBC1 domain family member 5 [Raphanus sativus]
BolC1t00904H	4.458	4.301	5.304	3.869	3.596	3.502	4.024	4.508	4.603	pathogenesis-related homeodomain protein isoform X3 [Arabidopsis lyrata subsp. lyrata]
BolC1t00905H	0.000	0.000	0.000	0.000	0.000	0.000	0.000	0.000	0.000	unnamed protein product [Brassica oleracea]
BolC1t00906H	0.319	0.388	0.060	1.908	1.219	0.854	11.412	1.753	4.119	transcription factor bHLH27 [Eutrema salsugineum]
BolC1t00907H	0.228	0.286	0.371	0.322	0.357	0.282	0.105	0.295	0.204	protein SMAX1-LIKE 4-like isoform X1 [Brassica napus]
BolC1t00908H	81.844	85.926	80.544	78.950	73.778	74.905	84.071	81.464	70.046	PREDICTED: UPF0725 protein At5g63820-like isoform X2 [Brassica rapa]
BolC1t00909H	45.707	41.624	47.808	36.713	43.171	44.336	41.506	40.989	39.723	UPF0725 protein At4g29550-like [Brassica napus]
BolC1t00910H	18.287	21.849	22.100	21.941	22.353	22.468	41.842	33.314	28.244	protein HEAT-INDUCED TAS1 TARGET 2-like isoform X2 [Brassica napus]
BolC1t00911H	9.330	9.318	10.539	9.758	8.704	10.271	16.166	15.796	12.739	PREDICTED: UPF0725 protein At4g29550-like [Brassica rapa]
BolC1t00912H	55.947	48.458	53.172	28.713	25.091	24.147	25.228	26.410	23.304	PREDICTED: UPF0725 protein At4g29550-like [Brassica rapa]
BolC1t00913H	30.709	20.107	29.760	25.743	25.622	24.197	33.332	30.976	24.562	protein HEAT-INDUCED TAS1 TARGET 2-like isoform X2 [Brassica napus]
BolC1t00914H	0.204	0.000	0.000	0.000	0.000	0.000	0.000	0.000	0.000	PREDICTED: UPF0725 protein At4g29550-like [Raphanus sativus]
BolC1t00915H	0.000	0.000	0.000	0.082	0.000	0.302	0.000	0.073	0.000	UPF0725 protein At4g29550-like [Brassica napus]
BolC1t00916H	0.000	0.000	0.069	0.000	0.066	0.061	0.000	0.059	0.062	UPF0725 protein At5g63820-like [Brassica napus]
BolC1t00917H	0.100	0.000	0.000	0.000	0.000	0.000	0.000	0.000	0.000	PREDICTED: UPF0725 protein At5g63820-like isoform X2 [Brassica rapa]
BolC1t00918H	6.196	6.771	9.383	15.712	18.258	5.183	30.197	29.420	15.992	PREDICTED: uncharacterized protein LOC108851501 [Raphanus sativus]
BolC1t00919H	0.000	0.000	0.000	0.000	0.000	0.000	0.000	0.172	0.000	BnaUnng01360D [Brassica napus]
BolC1t00920H	9.668	9.308	23.167	12.352	15.125	19.622	92.746	67.340	34.982	calcium-transporting ATPase 10, plasma membrane-type-like [Brassica napus]
BolC1t00921H	59.488	46.749	36.762	49.913	43.252	35.568	10.423	18.537	12.499	PREDICTED: oligosaccharyltransferase complex subunit ostc [Brassica rapa]
BolC1t00922H	9.856	11.047	7.791	4.709	6.186	5.509	4.585	6.542	7.119	PREDICTED: protein DECREASED SIZE EXCLUSION LIMIT 1 isoform X2 [Brassica rapa]
BolC1t00923H	24.713	19.677	22.854	22.748	19.896	15.860	14.556	13.740	19.100	PREDICTED: transmembrane protein 230 [Tarenaya hassleriana]
BolC1t00924H	48.569	61.664	49.189	21.183	20.456	21.200	13.991	15.550	15.133	PREDICTED: threonine synthase 1, chloroplastic [Brassica rapa]
BolC1t00925H	40.782	39.508	36.312	21.189	20.897	21.803	13.778	15.553	14.589	PREDICTED: WD repeat-containing protein VIP3 [Raphanus sativus]
BolC1t00926H	13.305	12.147	5.261	8.730	10.380	8.904	21.404	19.769	20.096	PREDICTED: pre-mRNA cleavage factor Im 25 kDa subunit 1 [Brassica oleracea var. oleracea]
BolC1t00927H	41.947	31.833	44.835	52.099	48.313	34.135	28.897	37.126	32.247	PREDICTED: mitogen-activated protein kinase kinase 2 [Brassica oleracea var. oleracea]
BolC1t00928H	0.053	0.000	0.030	1.972	0.832	0.317	0.056	0.229	0.054	patatin-like protein 8 isoform X1 [Brassica napus]
BolC1t00929H	9.871	8.619	11.086	7.398	6.400	5.692	6.510	7.940	9.962	PREDICTED: uncharacterized protein LOC106306159 isoform X1 [Brassica oleracea var. oleracea]
BolC1t00930H	5.692	17.182	19.426	22.664	8.332	7.423	108.267	27.322	192.309	protein ALP1-like [Brassica napus]
[truncated: 59,280 more rows]
