# Supplementary material for: Unravelling Glucoraphanin and Glucoerucin Metabolism across Broccoli Sprout Development: Insights from Metabolite and Transcriptome Analysis
Source: Plants (Basel). 2024 Mar 7;13(6):750. doi: 10.3390/plants13060750 (PMC10976094; doi:10.3390/plants13060750)
Supplement: Supplementary file 1 [file plants-13-00750-s001.zip › Table S3.xls]

## Sheet: ESPs
Gene Name	AGI ID	Gene ID（HDEM）	Gene ID(TO1000)		1d_A	1d_B	1d_C	3d_A	3d_B	3d_C	5d_A	5d_B	5d_C	Function
ESP4	AT1G54040	BolC6t36745H	Bol013374	BolC06g015450.2J	1.702	1.357	0.785	0	0	0	0.057	0	0	PREDICTED: epithiospecifier protein-like [Brassica rapa]
ESP2		BolC7t43254H	Bol006380	BolC07g026490.2J /BolC07g026460.2J/BolC07g026430.2J/BolC07g026370.2J	23.87	46.374	22.95	477.087	583.542	650.657	1029.15	1156.2	1139.78	PREDICTED: epithiospecifier protein-like [Brassica oleracea var. oleracea]
ESP2		BolC7t43256H	Bol006380	BolC07g026490.2J /BolC07g026460.2J/BolC07g026430.2J/BolC07g026370.2J	12.023	27.453	11.239	294.052	352.072	387.894	632.061	684.743	683.45	PREDICTED: epithiospecifier protein-like [Brassica oleracea var. oleracea]
ESP1		BolC6t36054H	Bol039072	BolC06g009100.2J	0	0	0	0	0	0	0	0	0	epithiospecifier protein [Isatis tinctoria]
ESP3		BolC2t10539H—BolC2t10540H	Bol024137	BolC02g044590.2J
ESM1	AT3G14210	BolC5t33997H	BolC05g052270.2J		1.011	2.937	2.624	280.588	195.241	74.872	54.405	64.723	152.337	ESM1 [Pachycladon enysii]
		BolC5t33998H	BolC05g052290.2J		0	0.133	0.457	16.416	24.548	33.078	8.197	12.971	8.156	ESM1 [Pachycladon enysii]
		BolC5t34011H	BolC05g052290.2J		0	0.571	0.617	164.829	279.374	300.153	46.278	52.859	38.192	ESM1 [Pachycladon enysii]
		BolC5t34004H	BolC05g052290.2J		0	0.065	0	92.161	178.687	177.693	39.266	47.555	33.52	epithiospecifier modifier [Brassica rapa subsp. pekinensis]

## Sheet: NSPs
Gene Name	AGI ID	Gene ID（HDEM）	Gene ID(TO1000)	1d_A	1d_B	1d_C	3d_A	3d_B	3d_C	5d_A	5d_B	5d_C	Function
NSP1	AT3G16400	BolC5t33742H	BolC05g049830.2J	0.537	0.435	0.349	32.807	8.683	3.749	2.348	3.247	3.143	PREDICTED: nitrile-specifier protein 1-like [Brassica oleracea var. oleracea]
		BolC5t33748H	BolC05g049880.2J	27.485	26.698	27.814	195.646	121.841	60.776	38.248	51.215	41.881	PREDICTED: nitrile-specifier protein 1-like [Brassica oleracea var. oleracea]
		BolC5t33753H	BolC05g049880.2J	0.726	0	0.44	14.895	4.545	1.701	1.24	1.642	2.15	PREDICTED: nitrile-specifier protein 1-like [Brassica oleracea var. oleracea]
NSP2	AT2G33070	BolC1t04757H	BolC01g046450.2J	0.06	0.073	0.068	275.034	156.055	79.265	102.105	61.343	204.599	nitrile-specifier protein 2-like [Brassica napus]
NSP5	AT5G48180	BolC7t44414H	BolC07g037340.2J	13.076	16.073	8.205	10.176	11.099	12.842	49.789	39.967	178.243	nitrile-specifier protein 5 [Brassica napus]
		BolC2t11690H	BolC02g055310.2J	2.565	2.27	2.716	6.71	13.667	6.067	3.851	1.475	40.895	nitrile-specifier protein 5-like [Brassica napus]

## Sheet: BGLUs
Gene Name	AGI ID	Geneid	1d_A	1d_B	1d_C	3d_A	3d_B	3d_C	5d_A	5d_B	5d_C	Function
TGG1(BGLU38)	AT5G26000	BolC6t36047H	3.365	8.127	7.394	181.293	326.352	146.812	89.11	125.638	30.169	myrosinase-associated protein 1 [Brassica napus]
		BolC8t48254H	23.159	24.38	11.257	38.005	35.923	20.695	6.302	7.215	12.352	PREDICTED: myrosinase MA1 [Brassica rapa]
		BolC2t11932H	11.076	19.573	9.017	224.021	268.392	258.744	239.271	236.081	263.132	myrosinase [Brassica oleracea var. italica]
		BolC2t11935H	8.197	14.9	5.825	190.428	236.376	226.787	155.714	140.9	149.745	myrosinase [Brassica oleracea var. italica]
		BolC2t11975H	6.299	12.143	4.566	148.239	154.026	152.268	49.281	51.706	45.194	myrosinase [Brassica oleracea var. italica]
		BolC2t11980H	0.627	3.804	1.601	52.94	71.453	58.696	23.29	24.638	32.556	myrosinase 2 [Brassica napus]
		BolC2t11981H	0	0.693	0	79.726	30.344	80.506	26.325	40.966	39.303	myrosinase, thioglucoside glucohydrolase [Brassica napus]
		BolC2t11983H	7.438	26.146	12.658	109.694	122.952	117.361	38.937	29.369	35.22	myrosinase [Brassica oleracea var. italica]
TGG2(BGLU37)	AT5G25980	BolC2t11930H	0.132	0.641	0.05	5.407	7.784	8.131	7.753	5.887	8.454	myrosinase-like isoform X1 [Brassica napus]
		BolC3t15850H	0.886	1.46	0.287	35.477	42.531	34.609	22.82	22.069	25.08	myrosinase [Brassica napus]
		BolC3t15851H	0.287	0.174	0.081	6.152	8.915	7.408	2.982	3.819	4.217	myrosinase-like [Brassica napus]
		BolC9t54149H	0.026	0.032	0.03	6.145	15.844	13.728	9.234	3.568	6.544	PREDICTED: myrosinase-like [Raphanus sativus]
		BolC5t32066H	0.054	0	0.155	35.644	8.199	1.721	0.697	0.396	2.136	PREDICTED: myrosinase 4-like [Raphanus sativus]
TGG5(BGLU35)	AT1G51470	BolC3t21362H	1.871	2.678	4.997	1.634	3.209	2.929	3.578	8.159	5.025	PREDICTED: myrosinase-binding protein 2-like [Brassica rapa]
MBP2	AT1G52030	BolC6t35814H	5.567	11.673	7.016	778.325	988.348	710.134	776.116	970.126	631.436	PREDICTED: myrosinase-binding protein 2-like isoform X2 [Brassica rapa]
		BolC9t57640H	9.572	5.125	8.932	5.079	10.2	2.724	1.099	3.944	2.62	PREDICTED: myrosinase-binding protein 2-like isoform X2 [Brassica rapa]
PEN2(BGLU27)	AT2G44490	BolC1t05229H	2.657	4.609	3.88	33.414	24.027	24.766	67.245	45.977	36.444	beta-glucosidase 27-like isoform X2 [Brassica napus]
BGLU28	AT2G44460	BolC4t28607H	40.865	24.755	36.123	45.421	38.344	18.759	4.835	9.087	9.027	beta-glucosidase 15-like [Brassica napus];BGLU28
		BolC4t22177H	19.934	8.845	28.668	16.282	13.25	8.779	13.051	22.878	19.322	beta-glucosidase 26, peroxisomal [Brassica napus];BGLU28
BGLU30	AT3G60140	BolC8t51112H	3.107	2.436	3.029	17.018	11.295	7.049	2.82	5.809	9.523	PREDICTED: beta-glucosidase 16 isoform X1 [Raphanus sativus];BGLU30
PYK10(BGLU23)	AT3G09260	BolC3t16643H	84.856	78.705	79.849	491.249	265.096	127.065	101.007	31.962	151.54	beta-glucosidase 23 [Brassica napus];PYK10;BGLU23
		BolC1t05467H	11.61	18.612	13.703	867.921	504.558	263.771	257.37	112.789	707.627	beta-glucosidase 23 [Brassica napus];PYK10;BGLU23
		BolC8t47984H	20.518	14.909	20.722	41.894	13.138	5.263	2.798	3.007	2.9	beta-glucosidase 23 isoform X3 [Eutrema salsugineum];PYK10;BGLU23
MVP1	AT1G54030	BolC3t21510H	24.782	28.667	18.496	115.345	98.563	80.017	36.389	39.312	33.991	inactive GDSL esterase/lipase-like protein 25 [Brassica napus]
		BolC6t36744H	4.822	4.573	3.118	12.662	13.176	7.42	6.686	7.265	9.085	PREDICTED: inactive GDSL esterase/lipase-like protein 25 [Brassica rapa]

## Sheet: Transcription factors
Gene Name	AGI ID	Geneid	1d_A	1d_B	1d_C	3d_A	3d_B	3d_C	5d_A	5d_B	5d_C	Function
MYB51	AT1G18570	BolC8t49496H	36.541	28.95	85.394	25.82	18.953	20.218	92.353	34.553	23.225	transcription factor MYB51-like [Brassica napus]
		BolC8t51877H	3.281	3.559	8.945	5.516	2.626	0.791	4.669	4.494	8.898	transcription factor MYB51-like [Brassica napus]
MYB122	AT1G74080	BolC6t38451H	0.202	0.613	0.402	19.93	21.393	12.018	5.176	11.259	8.762	PREDICTED: transcription factor MYB122-like [Brassica rapa]
		BolC6t39854H	3.293	2.482	3.655	6.253	4.792	1.824	1.212	0.55	1.485	transcription factor MYB122-like [Brassica napus]
MYB34	AT5G60890	BolC2t12163H	1.364	4.691	3.149	14.177	20.387	14.417	39.338	8.544	8.165	PREDICTED: transcription factor MYB34-like [Raphanus sativus]
		BolC7t44988H	6.336	8.5	7.447	19.26	20.115	11.829	28.984	19.791	15.734	MYB34 protein [Eruca vesicaria subsp. sativa]
		BolC8t51868H	0.606	1.07	0.813	20.172	20.617	26.039	63.186	56.305	29.113	PREDICTED: transcription factor MYB34-like isoform X1 [Brassica oleracea var. oleracea]
		BolC9t53709H	16.72	16.879	25.826	9.968	7.403	4.603	6.169	4.999	7.447	PREDICTED: transcription factor MYB34-like [Raphanus sativus]
MYB28	AT5G61420	BolC2t12216H	0	0	0.181	5.794	12.418	22.324	13.799	19.893	11.953	Myb transcription factor BoMyb28-1 [Brassica oleracea var. viridis]
		BolC9t53733H	0	0.047	0	11.858	14.694	4.505	9.744	25.232	22.288	MYB28 [Brassica oleracea var. alboglabra]
WRKY33	AT1G32640	BolC3t14916H	8.81	20.214	60.395	24.123	10.864	6.058	66.028	33.067	48.518	transcription factor WRKY33 [Brassica carinata]
MYC2	AT1G32640	BolC5t32569H	5.655	6.95	7.754	22.808	22.377	19.427	41.261	25.927	28.002	PREDICTED: transcription factor MYC2 [Raphanus sativus]
		BolC8t47950H	0.784	6.348	5.614	26.007	12.838	6.894	102.762	26.988	73.895	transcription factor MYC2 [Brassica napus]
		BolC7t43546H	18.653	12.046	14.877	19.297	17.101	15.875	25.265	21.742	21.211	transcription factor MYC3-like isoform X3 [Brassica napus]
		BolC7t46749H	50.722	64.103	43.264	64.567	85.019	96.806	36.285	41.024	37.761	PREDICTED: transcriptional regulator Myc-2 [Brassica rapa]
		BolC8t47950H	0.784	6.348	5.614	26.007	12.838	6.894	102.762	26.988	73.895	transcription factor MYC2 [Brassica napus]
		BolC9t55747H	14.846	13.588	11.402	15.345	16.94	13.947	9.725	13.609	13.724	transcription factor MYC3 isoform X2 [Brassica napus]
		BolC1t01134H	9.179	8.556	9.419	19.717	21.658	9.647	2.353	6.433	3.192	bHLH transcription factor MYC4-1 [Brassica napus]
		BolC3t14950H	5.734	6.693	2.895	19.298	15.751	14.737	19.837	27.084	27.455
SLIM1	AT1G73730	BolC6t39823H	16.13	15.715	19	13.206	11.352	9.166	16.242	14.097	13.757	PREDICTED: ETHYLENE INSENSITIVE 3-like 3 protein isoform X2 [Brassica oleracea var. oleracea]
CAMTA3	AT2G22300	BolC4t26730H	22.425	22.638	35.67	25.943	23.744	18.756	40.1	31.371	27.505	PREDICTED: calmodulin-binding transcription activator 3 isoform X2 [Brassica oleracea var. oleracea];CAMTA3

## Sheet: Biosynthesis genes
Gene Name	AGI ID	Geneid	1d_A	1d_B	1d_C	3d_A	3d_B	3d_C	5d_A	5d_B	5d_C	Function
BCAT-3	AT3G49680	BolC1t03003H	33.758	44.829	36.174	25.387	26.582	28.538	18.545	20.731	21.94	PREDICTED: branched-chain-amino-acid aminotransferase 3, chloroplastic isoform X1 [Brassica oleracea var. oleracea]
		BolC8t50083H	29.36	37.191	32.745	35.436	44.211	47.499	35.324	45.239	40.985	PREDICTED: branched-chain-amino-acid aminotransferase 3, chloroplastic [Brassica oleracea var. oleracea]
BCAT-6	AT1G50110	BolC4t23087H	3.261	4.279	2.091	2.687	3.1	3.538	6.792	4.944	6.788	PREDICTED: branched-chain-amino-acid aminotransferase 6 [Brassica oleracea var. oleracea]
		BolC6t35625H	52.035	61.534	57.642	20.364	22.291	24.735	55.257	58.168	63.487	PREDICTED: branched-chain-amino-acid aminotransferase 6 [Brassica oleracea var. oleracea]
MAM-1,-2	At5g23010/AT5G23020	BolC1t03369H	0	0.043	0	8.501	13.426	10.564	1.518	2.24	1.065	PREDICTED: methylthioalkylmalate synthase 1, chloroplastic isoform X2 [Brassica rapa]
SUR1	AT2G20610	BolC7t40482H	28.827	38.286	38.64	17.301	11.504	9.686	13.02	8.815	10.058	SUR1 [Brassica rapa subsp. rapa]
		BolC7t46097H	3.191	5.849	6.075	3.161	4.984	6.248	2.27	3.001	2.551	S-alkyl-thiohydroximate lyase SUR1-like isoform X1 [Brassica napus]
SOT16	AT1G74100	BolC2t09190H	105.376	155.295	202.557	89.774	73.872	63.105	119.374	52.827	50.405	PREDICTED: cytosolic sulfotransferase 16 [Brassica rapa]
		BolC6t39857H	23.905	29.629	41.502	27.06	15.599	13.141	54.161	15.456	17.921	PREDICTED: cytosolic sulfotransferase 16 [Brassica rapa]
SOT17	AT1G18590	BolC5t30386H	10.596	16.347	23.031	3.613	2.766	2.002	3.814	1.651	1.63	PREDICTED: cytosolic sulfotransferase 17 [Brassica oleracea var. oleracea]
SOT18	AT1G74090	BolC6t39856H	2.198	2.57	3.19	13.759	6.264	4.168	5.213	5.049	10.045	cytosolic sulfotransferase 18 [Brassica napus]
	AT1G74090	BolC9t55225H	3.924	8.677	9.806	13.243	12.533	5.971	24.731	17.012	21.92	PREDICTED: cytosolic sulfotransferase 18-like isoform X2 [Brassica oleracea var. oleracea]
FMO GS-OX5	AT1G12140	BolC8t49154H	7.226	6.761	5.578	3.229	3.106	2.48	0.2	0.606	0.807	flavin-containing monooxygenase FMO GS-OX5-like isoform X2 [Brassica napus]
FMO GS-OX2	AT1G62540	BolC8t52304H	25.842	11.704	21.761	2.346	1.936	1.514	1.672	1.604	3.358	PREDICTED: flavin-containing monooxygenase FMO GS-OX-like 2 [Raphanus sativus]
FMO		BolC8t52306H	164.994	215.463	206.123	53.123	44.95	32.669	24.405	27.662	31.111	flavin-containing monooxygenase [Brassica rapa var. rapa]
FMO GS-OX4	AT1G62570	BolC9t54464H	3.906	2.79	3.947	15.482	15.516	16.606	17.103	19.398	13.373	flavin-containing monooxygenase FMO GS-OX-like 4 isoform X1 [Eutrema salsugineum]
	AT1G62570	BolC9t54862H	36.003	30.878	33.573	24.918	22.667	18.682	38.589	41.525	31.518	PREDICTED: flavin-containing monooxygenase FMO GS-OX-like 4 [Brassica rapa]
FMO GS-OX2	AT1G62540	BolC9t54864H	0.149	0.181	0.169	2.587	2.143	2.061	4.858	7.035	2.826	PREDICTED: flavin-containing monooxygenase FMO GS-OX2 [Brassica oleracea var. oleracea]
FMO GS-OX9		BolC9t59647H	8.36	12.513	11.394	31.287	31.485	36.586	9.376	18.882	19.835	PREDICTED: flavin-containing monooxygenase FMO GS-OX-like 9 [Raphanus sativus]
AOP3	AT4G03050	BolC9t53179H	3.184	4.29	5.053	11.756	6.617	2.977	5.679	6.805	13.149	PREDICTED: probable 2-oxoglutarate-dependent dioxygenase AOP1 [Brassica rapa]
GSL-OH	AT2G25450	BolC3t13531H	12.472	19.827	14.888	22.346	16.758	10.451	12.031	8.202	9.86	PREDICTED: probable 2-oxoacid dependent dioxygenase [Brassica oleracea var. oleracea]
		BolC4t27497H	1567.94	1939.37	1631.41	160.306	70.759	53.593	9.041	7.129	38.627	PREDICTED: probable 2-oxoacid dependent dioxygenase [Brassica oleracea var. oleracea]
		BolC4t27500H	118.781	110.256	81.625	3.735	2.201	1.912	0.558	0.036	1.928	PREDICTED: probable 2-oxoacid dependent dioxygenase [Brassica oleracea var. oleracea]
		BolC4t27501H	26.693	19.55	29.392	13.113	9.95	8.996	30.846	23.046	25.594	PREDICTED: probable 2-oxoacid dependent dioxygenase [Brassica oleracea var. oleracea]
CYP83A1	AT4G13770	BolC4t25797H	0	0	0	7.192	8.197	6.586	7.42	17.884	7.005	cytochrome P450 CYP83A1-1 [Brassica oleracea var. italica]
CYP83B1	AT4G31500	BolC8t47784H	194.433	201.364	208.328	207.308	164.159	132.601	84.804	80.649	50.371	cytochrome P450 83B1 [Brassica napus]
CYP79B2	AT4G39950	BolC1t00094H	7.594	17.978	16.702	95.61	83.9	51.24	39.327	28.178	16.204	cytochrome P450 79b2 [Brassica rapa subsp. pekinensis]
CYP81F1	AT4G37430	BolC1t00164H	19.578	37.688	21.152	10.501	7.878	7.105	10.881	9.744	4.785	cytochrome P450 81F1-like [Brassica napus]
		BolC1t00165H	0.141	0.239	0.288	4.405	10.997	7.6	0.3	0	5.666	cytochrome P450 81F1-like [Brassica napus]
CYP81F2	AT5G57220	BolC9t57757H	97.035	37.768	230.203	22.054	8.657	5.344	8.378	20.427	34.804	cytochrome P450 81F2-like [Brassica napus]
		BolC2t07573H	18.281	6.697	13.175	5.314	2.327	1.056	1.305	0.992	1.937	PREDICTED: cytochrome P450 81F2-like [Raphanus sativus]
CYP81F3	AT4G37400	BolC1t00169H	5.534	6.037	4.562	9.372	4.077	2.171	2.938	5.199	3.364	PREDICTED: cytochrome P450 81F3 [Raphanus sativus]
CYP81F4	AT4G37410	BolC1t00168H	21.291	21.503	22.402	155.401	114.774	46.027	14.391	18.082	47.542	cytochrome P450 81F4 [Brassica napus]
		BolC3t20185H	0.364	0.34	0.381	6.051	7.481	2.612	0.657	0.298	0.375	cytochrome P450 81F4-like [Brassica napus]
GSTG9	AT2G30860	BolC4t27502H	138.82	249.877	192.38	900.541	971.888	688.557	401.352	405.317	274.549	PREDICTED: glutathione S-transferase F9 [Brassica rapa]
		BolC3t14411H	179.784	257.377	189.278	629.403	602.037	396.687	251.123	306.146	245.55	PREDICTED: glutathione S-transferase F9 [Brassica rapa]
GSTG10	AT2G30870	BolC3t14412H	13.394	3.79	10.265	153.623	126.808	75.056	28.034	40.639	36.316	GSTF10 [Arabidopsis thaliana]
GSTG11	AT3G03190	BolC5t35031H	5.059	6.385	4.687	12.515	14.674	18.039	27.135	21.027	14.225	PREDICTED: glutathione S-transferase F11 [Brassica oleracea var. oleracea]
GSTG20	AT1G78370	BolC6t38215H	114.032	149.959	123.515	707.718	809.624	833.562	314.616	300.778	275.622	GSTU20 [Arabidopsis thaliana]
GGP1	AT4G30530	BolC1t00820H	40.735	55.1	76.326	74.858	76.333	59.03	240.708	84.746	53.665	PREDICTED: gamma-glutamyl peptidase 1 [Raphanus sativus]
		BolC3t21172H	101.949	89.818	200.253	56.189	39.815	38.417	110.352	96.783	88.729	gamma-glutamyl peptidase 1 [Brassica napus]
		BolC7t46258H	78.728	82.073	120.114	127.398	134.407	109.354	204.581	145.419	103.633	PREDICTED: gamma-glutamyl peptidase 1-like [Raphanus sativus]
UGT74C1	AT2G31790	BolC4t27616H	0.145	0	0.164	4.249	5.689	7.703	0.773	1.824	0.448	PREDICTED: UDP-glycosyltransferase 74C1 [Brassica oleracea var. oleracea]
		BolC4t27617H	0.4	0.709	0.105	10.554	15.697	21.532	10.495	8.219	10.851	UDP-glucosyl transferase 74c1 [Brassica rapa subsp. pekinensis]
UGT74B1	AT1G24100	BolC5t31022H	9.624	12.16	16.157	20.427	16.641	13.101	18.487	8.917	6.862	UDP-glucosyl transferase 74b1 [Brassica rapa subsp. pekinensis]
IGMT1	AT1G21100	BolC2t09489H	3.934	18.125	18.624	150.117	169.848	103.443	27.073	45.032	32.643	PREDICTED: indole glucosinolate O-methyltransferase 1-like [Raphanus sativus]
		BolC7t42749H	0.803	0.406	0.608	64.688	25.838	14.702	0.571	1.879	2.209	indole glucosinolate O-methyltransferase 1-like [Brassica napus]
		BolC7t42750H	36.952	13.36	104.368	99.539	46.024	18.772	21.641	62.515	67.612	indole glucosinolate O-methyltransferase 1-like [Brassica napus]
		BolC7t43221H	0.184	0	0.167	18.54	13.362	8.894	3.767	3.456	8.996	PREDICTED: indole glucosinolate O-methyltransferase 1-like [Raphanus sativus]
		BolC7t43228H	0	0	0	6.553	8.747	8.193	7.847	18.561	12.791	PREDICTED: indole glucosinolate O-methyltransferase 1-like [Raphanus sativus]
IGMT2	AT1G21120	BolC6t38262H	1.507	2.857	2.673	12.786	12.118	7.344	1.766	3.064	1.215	PREDICTED: indole glucosinolate O-methyltransferase 2-like isoform X1 [Raphanus sativus]
IGMT4	AT1G21130	BolC5t30682H	26.197	10.885	55.058	30.094	13.806	8.598	23.705	46.169	30.918	indole glucosinolate O-methyltransferase 4 [Brassica napus]
IGMT5	AT1G76790	BolC6t38308H	2.801	5.516	2.064	12.096	8.8	5.738	3.717	2.054	1.993	indole glucosinolate methyltransferase 5 [Brassica napus]
		BolC6t40123H	107.663	120.476	125.076	197.56	214.174	89.563	67.791	95.669	93.406	indole glucosinolate methyltransferase 5 [Brassica napus]
