# Supplementary figures and images for: Unravelling Glucoraphanin and Glucoerucin Metabolism across Broccoli Sprout Development: Insights from Metabolite and Transcriptome Analysis
Source: MDPI journal article supplement (doi:10.3390/plants13060750), 2024-03-07

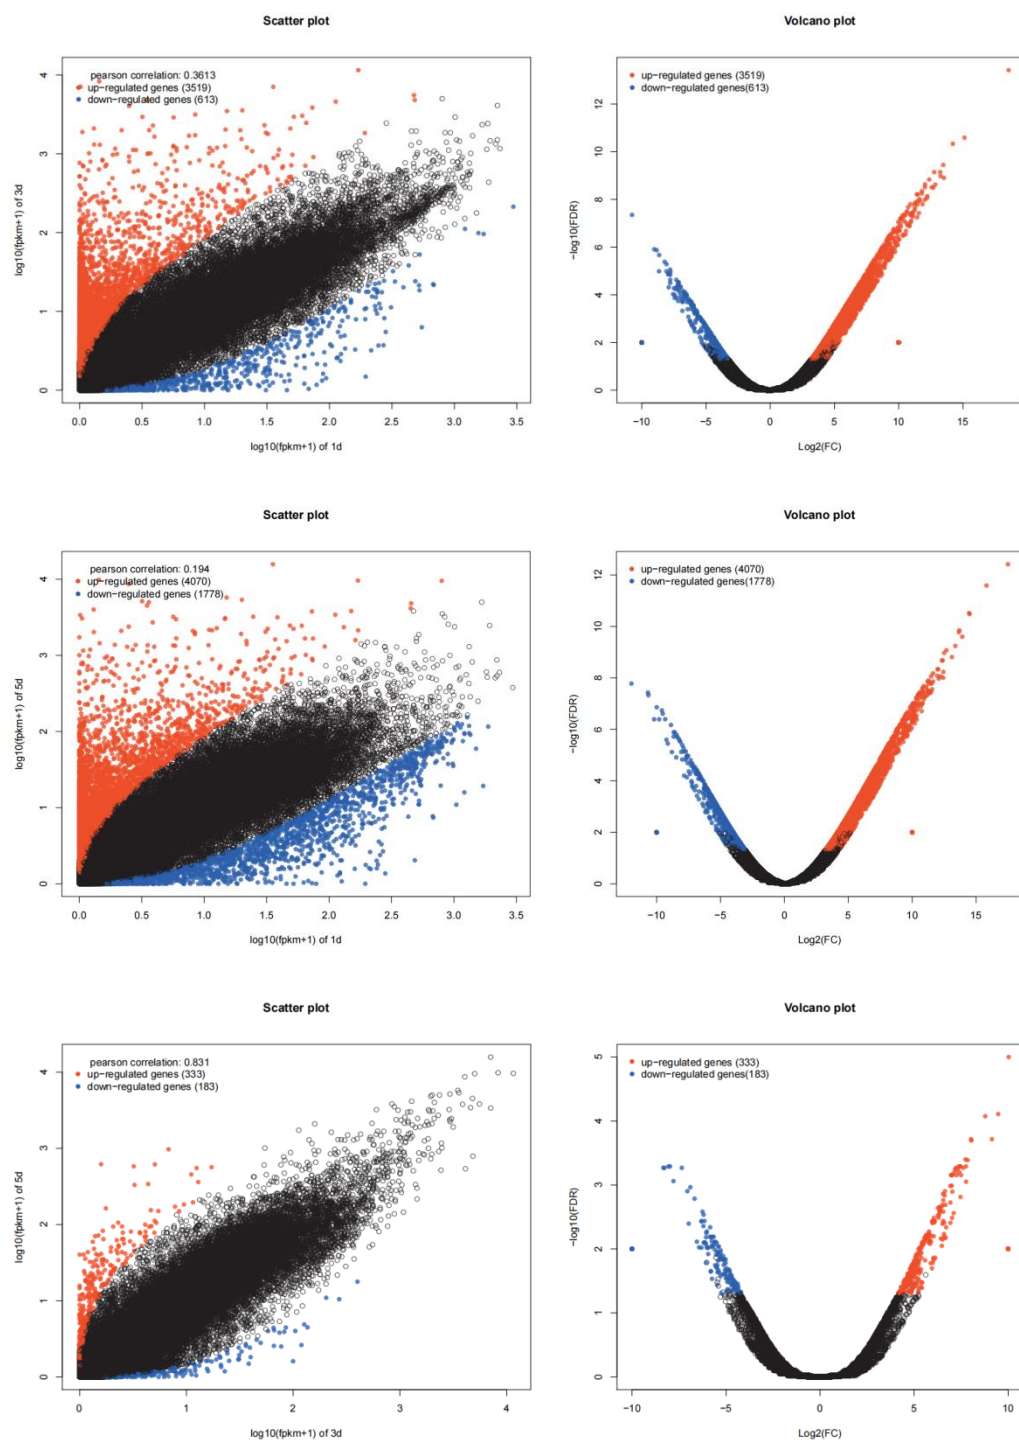

Figure S1. DEGs analysis for 3d vs 1d (up), 5d vs 1d (middle) and 5d vs 3d (down).

Supplement: s1 [file s1]
